# Supplementary material for: Comparative analysis of clonal evolution among patients with right- and left-sided colon and rectal cancer
Source: PubMed Central journal article supplement — iScience. 2021 Jun 11;24(7):102718. doi: 10.1016/j.isci.2021.102718 (PMC8254024; doi:10.1016/j.isci.2021.102718), 2021-06-11

# Supplemental Data 1

## Supplemental Data 1. Phylogenetic trees, Related to Figure 2.

Phylogenetic trees for 62 non-hypermutated CRC tumors. For each multi-panel figure, top-left panel showed cancer cell fractions (CCF) as a heatmap for all clustered mutations. CCF value for each mutation represents the mean of the mutation cluster CCF values, with darker color indicating higher CCF value. Regions were indicated below heatmap, “TR” represented primary tumor regions, “LN” represented lymph node metastasis regions and “LN\_ENTD” represented extranodal tumour deposits regions. Middle top panel showed the complete phylogenetic tree as constructed based on the mutation clusters. Cancer driver genes found in the tumor, with cytoband, type [mutation (SNV and InDel)/ copy number aberration (Amp and Del)] and mutation cluster were indicated on the right, with a colored bar representing individual clusters of driver genes. Below were phylogenetic trees drawn for each region. Grid of 100 representative cells were shown beneath the tree. The colors within each cell represented the mutational clusters. The color of each cell was determined by the color of the “latest cluster” in this cell. Each cell contains mutations in all the clusters along the path from the “ancestor cluster” to the cluster represented by the color of this cell.

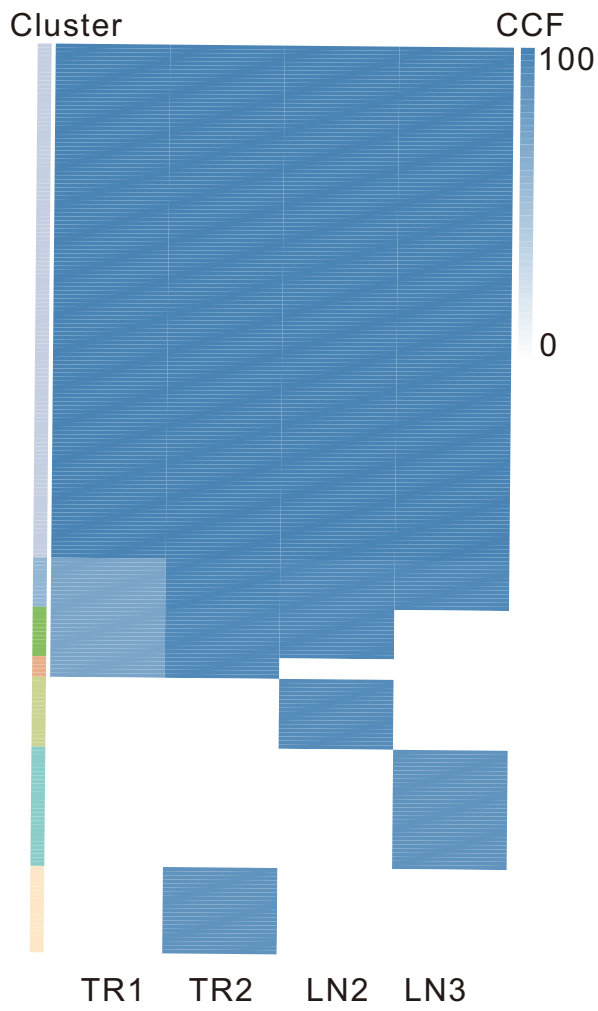

# CRC01

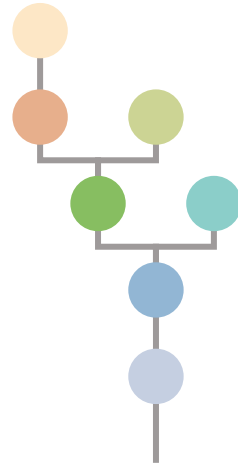

| Gene         | Cytoband | Type  | Cluster |
|--------------|----------|-------|---------|
| <i>TP53</i>  | 17p13.1  | SNV   | 1       |
| <i>MUC4</i>  | 3q29     | Amp   | 1       |
| <i>BCL9</i>  | 1q21.2   | Amp   | 4       |
| <i>TCF3</i>  | 19p13.3  | Del   | 4       |
| <i>B2M</i>   | 15q21.1  | InDel | 7       |
| <i>STK11</i> | 19p13.3  | Del   | NA      |

## TR1

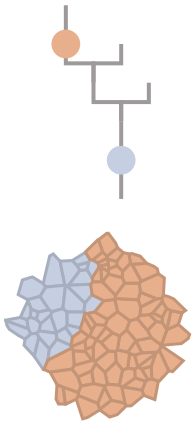

## TR2

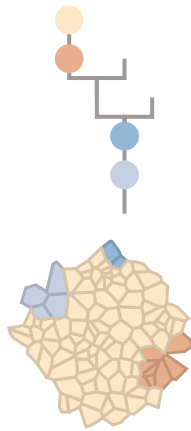

## LN2

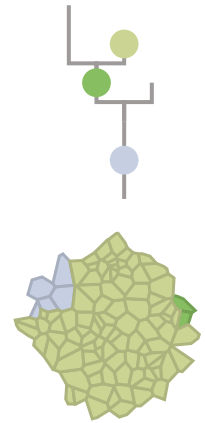

## LN3

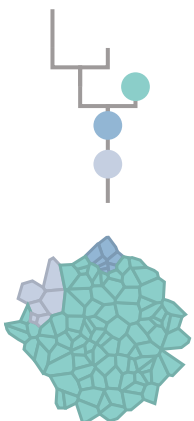

# CRC02

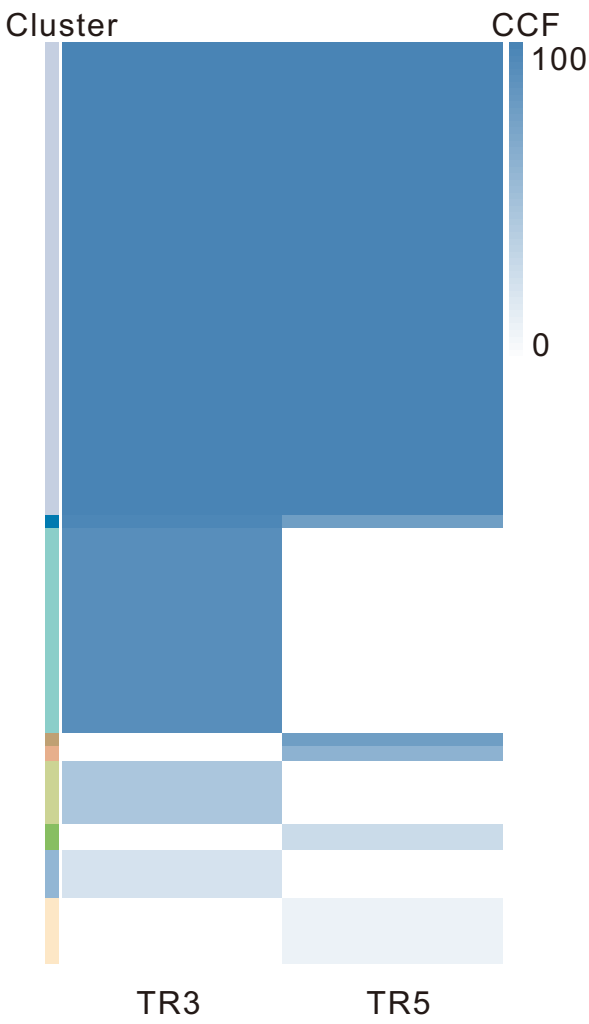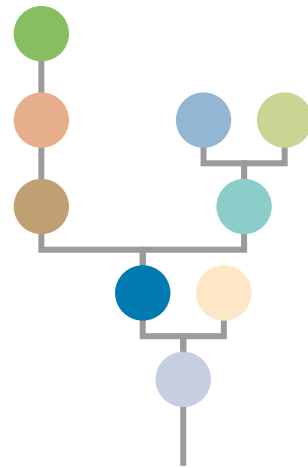

| Gene   | Cytoband | Type  | Cluster |
|--------|----------|-------|---------|
| * APC  | 5q22.2   | SNV   | 1       |
| CUX1   | 7q22.1   | SNV   | 1       |
| TP53   | 17p13.1  | SNV   | 1       |
| * APC  | 5q22.2   | InDel | 1       |
| FGFR1  | 8p11.23  | Amp   | 1       |
| CDKN2A | 9p21.3   | Del   | 1       |
| AMER1  | Xq11.2   | SNV   | NA      |
| ATRX   | Xq21.1   | SNV   | NA      |

## TR3

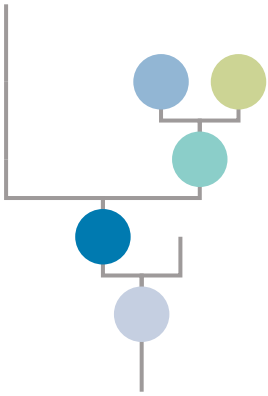

## TR5

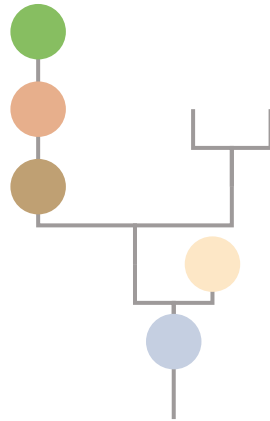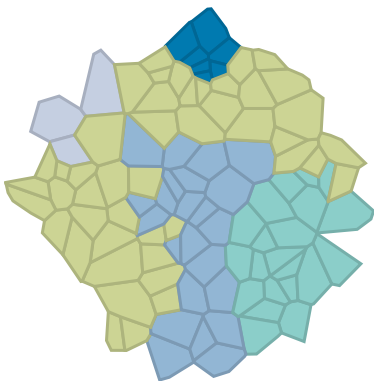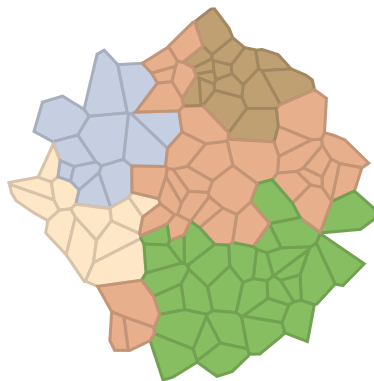

# CRC03

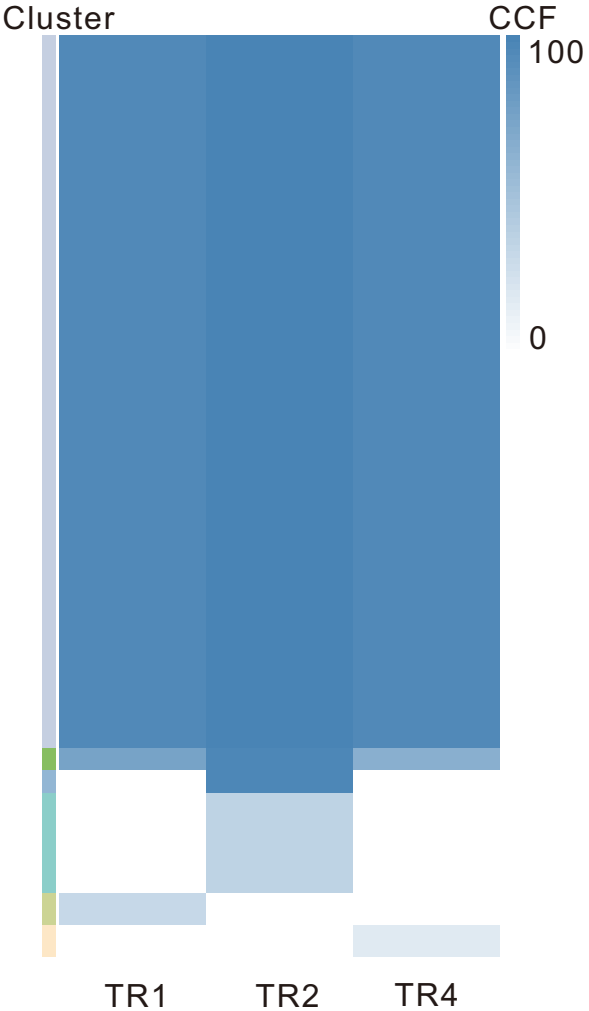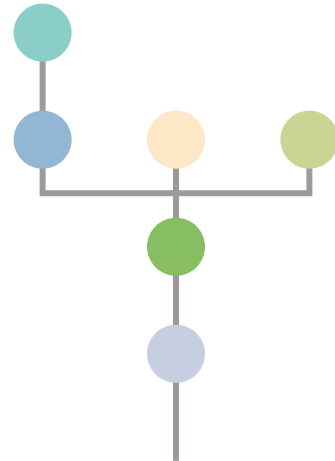

| Gene         | Cytoband | Type  | Cluster |
|--------------|----------|-------|---------|
| <i>APC</i>   | 5q22.2   | SNV   | 1       |
| <i>KRAS</i>  | 12p12.1  | SNV   | 1       |
| <i>ETV6</i>  | 12p13.2  | SNV   | 1       |
| <i>CSF3R</i> | 1p34.3   | InDel | 6       |
| <i>AMER1</i> | Xq11.2   | SNV   | NA      |
| <i>PTEN</i>  | 10q23.31 | Del   | NA      |

## TR1

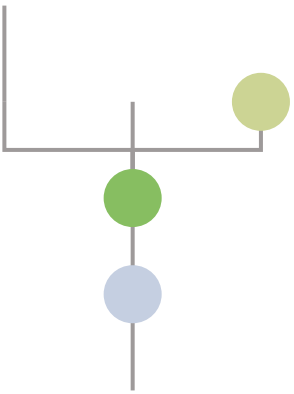

## TR2

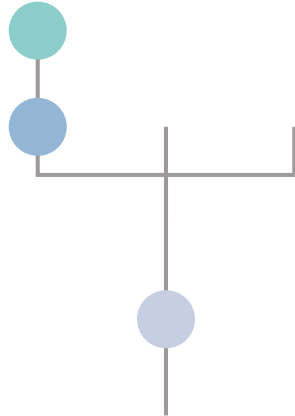

## TR4

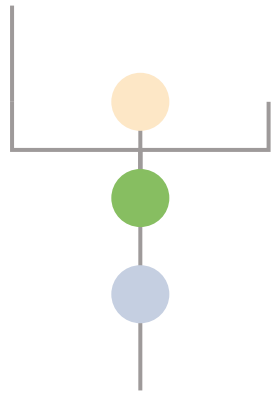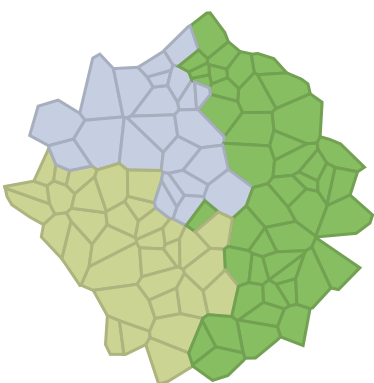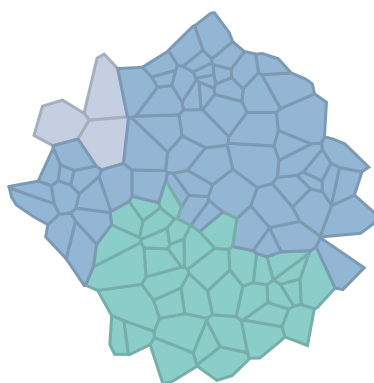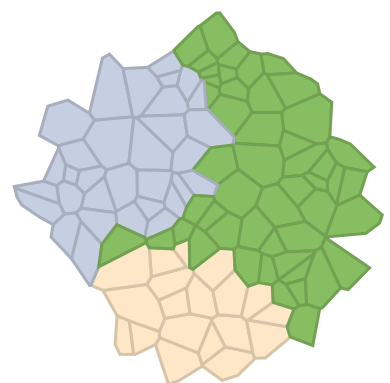

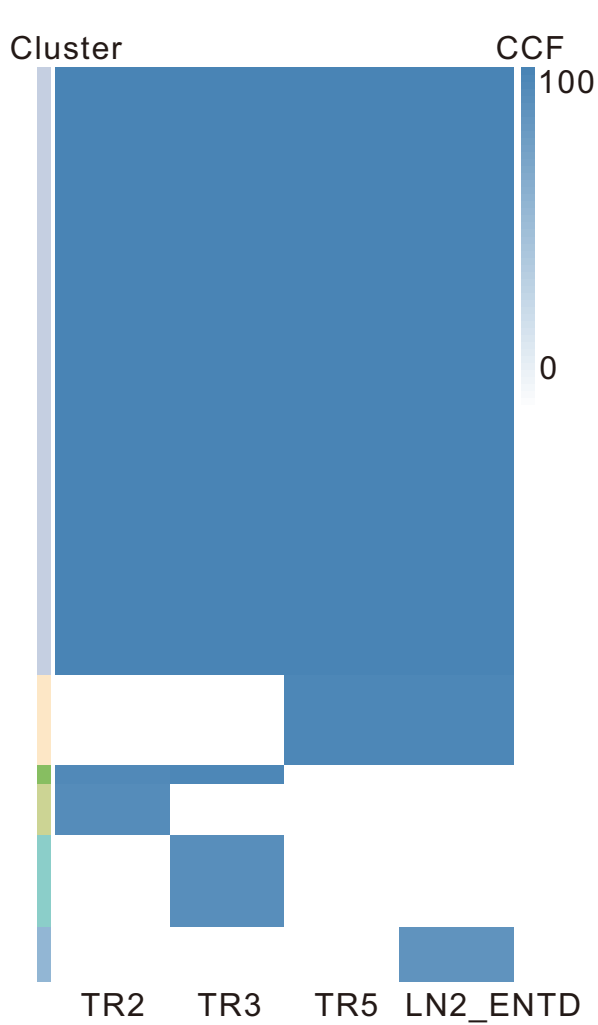

# CRC06

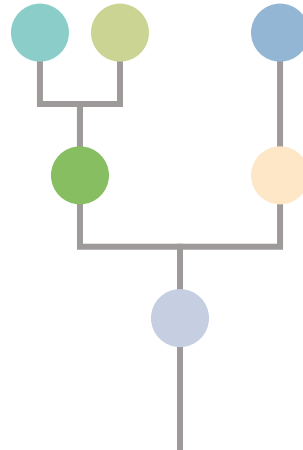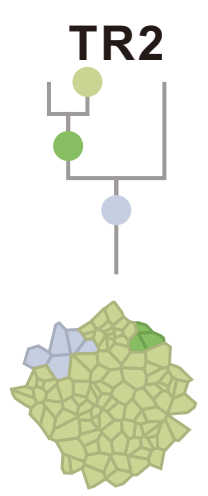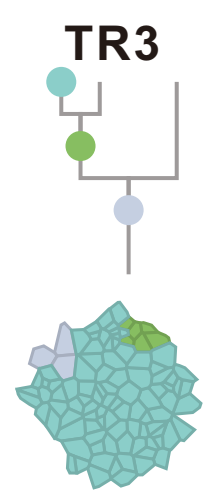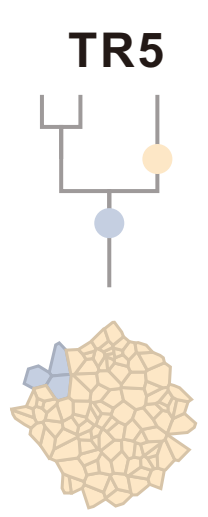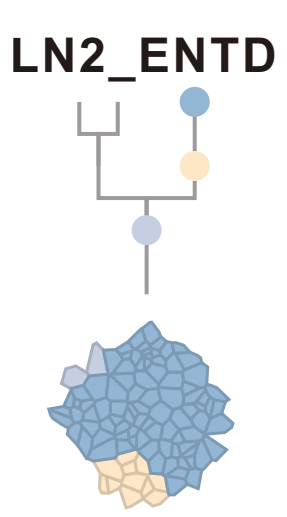

| Gene     | Cytoband | Type  | Cluster |
|----------|----------|-------|---------|
| *PIK3CA  | 3q26.32  | SNV   | 1       |
| *PIK3CA  | 3q26.32  | SNV   | 1       |
| KRAS     | 12p12.1  | SNV   | 1       |
| ERCC2    | 19q13.32 | SNV   | 1       |
| APC      | 5q22.2   | InDel | 1       |
| SSX2     | Xp11.22  | Amp   | 1       |
| ARAF     | Xp11.23  | Amp   | 1       |
| GATA1    | Xp11.23  | Amp   | 1       |
| SSX1     | Xp11.23  | Amp   | 1       |
| SSX4     | Xp11.23  | Amp   | 1       |
| TFE3     | Xp11.23  | Amp   | 1       |
| WAS      | Xp11.23  | Amp   | 1       |
| KDM6A    | Xp11.3   | Amp   | 1       |
| FOXO4    | Xq13.1   | Amp   | 1       |
| BTK      | Xq22.1   | Amp   | 1       |
| IRS4     | Xq22.3   | Amp   | 1       |
| BCORL1   | Xq26.1   | Amp   | 1       |
| ELF4     | Xq26.1   | Amp   | 1       |
| GPC3     | Xq26.2   | Amp   | 1       |
| CAMTA1   | 1p36.31  | Del   | 1       |
| RPL22    | 1p36.31  | Del   | 1       |
| TNFRSF14 | 1p36.32  | Del   | 1       |
| NOTCH1   | 9q34.3   | Del   | 1       |
| AXIN1    | 16p13.3  | Del   | 1       |
| CREBBP   | 16p13.3  | Del   | 1       |
| NTHL1    | 16p13.3  | Del   | 1       |
| TRAF7    | 16p13.3  | Del   | 1       |
| TSC2     | 16p13.3  | Del   | 1       |
| FLCN     | 17p11.2  | Del   | 1       |
| NCOR1    | 17p11.2  | Del   | 1       |
| MAP2K4   | 17p12    | Del   | 1       |
| PER1     | 17p13.1  | Del   | 1       |
| TP53     | 17p13.1  | Del   | 1       |
| YWHAE    | 17p13.3  | Del   | 1       |
| SMAD4    | 18q21.2  | InDel | 3       |
| CARS     | 11p15.4  | Del   | 3       |
| NOTCH2   | 1p12     | Amp   | 4       |
| ARNT     | 1q21.3   | Amp   | 4       |
| SETDB1   | 1q21.3   | Amp   | 4       |
| STK11    | 19p13.3  | Del   | 5       |
| TCF3     | 19p13.3  | Del   | 5       |
| SDHA     | 5p15.33  | Del   | 5       |
| TERT     | 5p15.33  | Del   | 5       |
| TP53     | 17p13.1  | SNV   | NA      |

# CRC07

| Gene     | Cytoband | Type  | Cluster |
|----------|----------|-------|---------|
| * APC    | 5q22.2   | SNV   | 1       |
| TBL1XR1  | 3q26.32  | SNV   | 2       |
| KRAS     | 12p12.1  | SNV   | 2       |
| TP53     | 17p13.1  | SNV   | 2       |
| * APC    | 5q22.2   | InDel | 2       |
| RUNX1    | 21q22.12 | Del   | 2       |
| CLTCL1   | 22q11.21 | Del   | 2       |
| LZTR1    | 22q11.21 | Del   | 2       |
| SMARCB1  | 22q11.23 | Del   | 2       |
| CHEK2    | 22q12.1  | Del   | 2       |
| ZNRF3    | 22q12.1  | Del   | 2       |
| NF2      | 22q12.2  | Del   | 2       |
| MYH9     | 22q12.3  | Del   | 2       |
| APOBEC3B | 22q13.1  | Del   | 2       |
| EP300    | 22q13.2  | Del   | 2       |
| MKL1     | 22q13.2  | Del   | 2       |
| FOXO4    | Xq13.1   | Del   | 2       |
| MED12    | Xq13.1   | Del   | 2       |
| ZMYM3    | Xq13.1   | Del   | 2       |
| ATRX     | Xq21.1   | Del   | 2       |
| BTK      | Xq22.1   | Del   | 2       |
| IRS4     | Xq22.3   | Del   | 2       |
| STAG2    | Xq25     | Del   | 2       |
| BCORL1   | Xq26.1   | Del   | 2       |
| ELF4     | Xq26.1   | Del   | 2       |
| GPC3     | Xq26.2   | Del   | 2       |
| PHF6     | Xq26.2   | Del   | 2       |
| ATP2B3   | Xq28     | Del   | 2       |
| RPL10    | Xq28     | Del   | 2       |
| ERBB4    | 2q34     | SNV   | 3       |
| RNF43    | 17q22    | SNV   | 4       |
| ATP1A1   | 1p13.1   | Amp   | 5       |
| MUC4     | 3q29     | Amp   | 5       |
| SIRPA    | 20p13    | Del   | 7       |
| ASXL1    | 20q11.21 | Del   | 7       |
| PTPRT    | 20q13.11 | Del   | 7       |
| PTK6     | 20q13.33 | Del   | 7       |

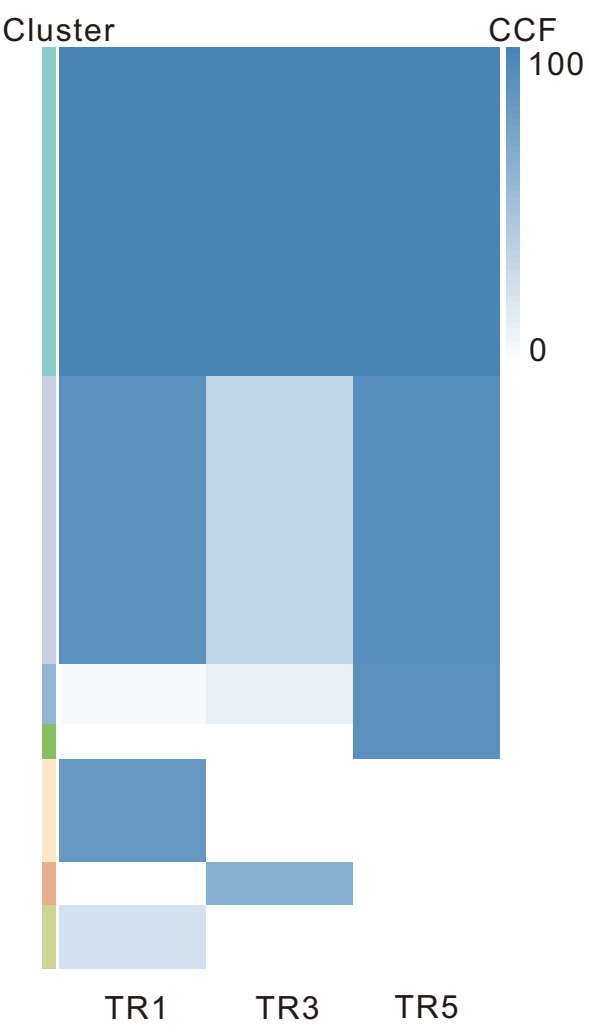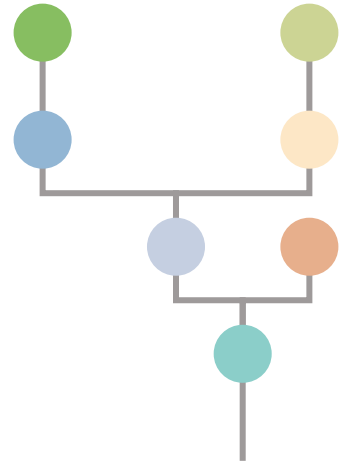

## TR1

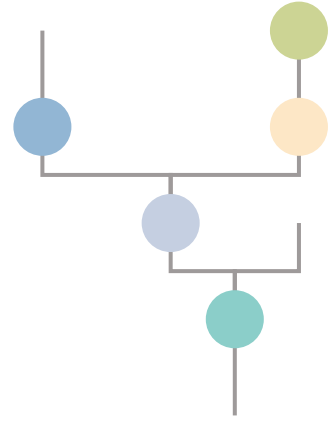

## TR3

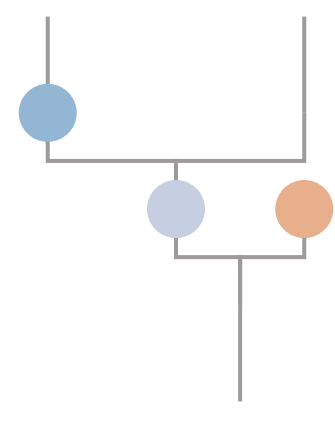

## TR5

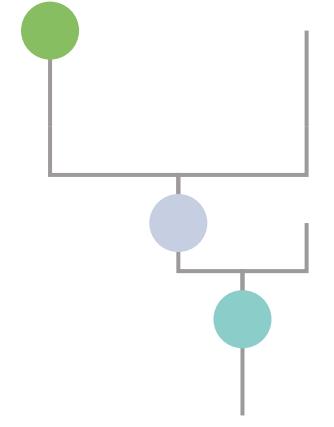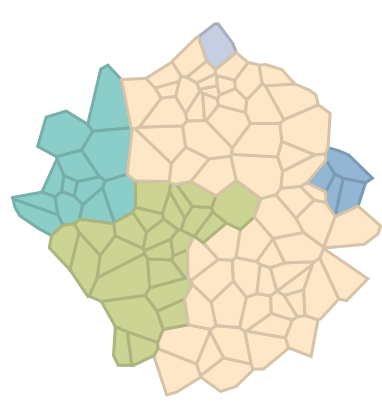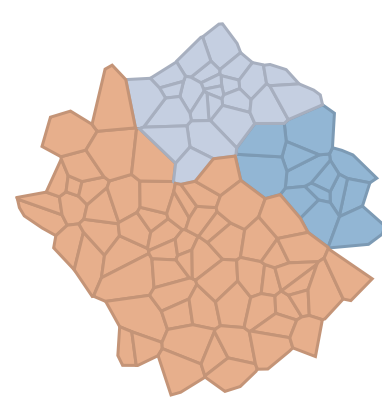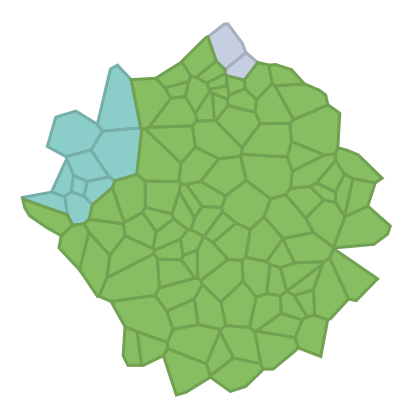

# CRC08

| Gene            | Cytoband | Type | Cluster |
|-----------------|----------|------|---------|
| <i>ESR1</i>     | 6q25.1   | SNV  | 1       |
| <i>ARHGEF10</i> | 8p23.3   | SNV  | 1       |
| <i>PREX2</i>    | 8q13.2   | SNV  | 1       |
| <i>CSMD3</i>    | 8q23.3   | SNV  | 1       |
| <i>BCL9</i>     | 1q21.2   | Amp  | 1       |
| <i>ARNT</i>     | 1q21.3   | Amp  | 1       |
| <i>SETDB1</i>   | 1q21.3   | Amp  | 1       |
| <i>POU5F1</i>   | 6p21.33  | Amp  | 1       |
| <i>TRIM27</i>   | 6p22.1   | Amp  | 1       |
| <i>HIST1H3B</i> | 6p22.2   | Amp  | 1       |
| <i>DEK</i>      | 6p22.3   | Amp  | 1       |
| <i>IRF4</i>     | 6p25.3   | Amp  | 1       |
| <i>CUX1</i>     | 7q22.1   | Amp  | 1       |
| <i>FLT3</i>     | 13q12.2  | Amp  | 1       |
| <i>FOXO1</i>    | 13q14.11 | Amp  | 1       |
| <i>CYSLTR2</i>  | 13q14.2  | Amp  | 1       |
| <i>SSX2</i>     | Xp11.22  | Amp  | 1       |
| <i>ARAF</i>     | Xp11.23  | Amp  | 1       |
| <i>GATA1</i>    | Xp11.23  | Amp  | 1       |
| <i>SSX1</i>     | Xp11.23  | Amp  | 1       |
| <i>SSX4</i>     | Xp11.23  | Amp  | 1       |
| <i>TFE3</i>     | Xp11.23  | Amp  | 1       |
| <i>WAS</i>      | Xp11.23  | Amp  | 1       |
| <i>KDM6A</i>    | Xp11.3   | Amp  | 1       |
| <i>BTK</i>      | Xq22.1   | Amp  | 1       |
| <i>IRS4</i>     | Xq22.3   | Amp  | 1       |
| <i>BCORL1</i>   | Xq26.1   | Amp  | 1       |
| <i>ELF4</i>     | Xq26.1   | Amp  | 1       |
| <i>GPC3</i>     | Xq26.2   | Amp  | 1       |
| <i>CASP9</i>    | 1p36.21  | Del  | 1       |
| <i>PRDM2</i>    | 1p36.21  | Del  | 1       |
| <i>SPEN</i>     | 1p36.21  | Del  | 1       |
| <i>CAMTA1</i>   | 1p36.31  | Del  | 1       |
| <i>RPL22</i>    | 1p36.31  | Del  | 1       |
| <i>TNFRSF14</i> | 1p36.32  | Del  | 1       |
| <i>DAXX</i>     | 6p21.32  | Del  | 1       |
| <i>NDRG1</i>    | 8q24.22  | Del  | 1       |
| <i>RECQL4</i>   | 8q24.3   | Del  | 1       |
| <i>FEN1</i>     | 11q12.2  | Del  | 1       |
| <i>SDHAF2</i>   | 11q12.2  | Del  | 1       |
| <i>MEN1</i>     | 11q13.1  | Del  | 1       |
| <i>FLCN</i>     | 17p11.2  | Del  | 1       |
| <i>NCOR1</i>    | 17p11.2  | Del  | 1       |
| <i>MAP2K4</i>   | 17p12    | Del  | 1       |
| <i>PER1</i>     | 17p13.1  | Del  | 1       |
| <i>TP53</i>     | 17p13.1  | Del  | 1       |
| <i>YWHAE</i>    | 17p13.3  | Del  | 1       |
| <i>ELL</i>      | 19p13.11 | Del  | 1       |
| <i>DNM2</i>     | 19p13.2  | Del  | 1       |
| <i>KEAP1</i>    | 19p13.2  | Del  | 1       |
| <i>SMARCA4</i>  | 19p13.2  | Del  | 1       |
| <i>STK11</i>    | 19p13.3  | Del  | 1       |
| <i>TCF3</i>     | 19p13.3  | Del  | 1       |
| <i>CLTCL1</i>   | 22q11.21 | Del  | 1       |
| <i>LZTR1</i>    | 22q11.21 | Del  | 1       |
| <i>SMARCB1</i>  | 22q11.23 | Del  | 1       |
| <i>CHEK2</i>    | 22q12.1  | Del  | 1       |
| <i>ZNRF3</i>    | 22q12.1  | Del  | 1       |
| <i>NF2</i>      | 22q12.2  | Del  | 1       |
| <i>MYH9</i>     | 22q12.3  | Del  | 1       |
| <i>APOBEC3B</i> | 22q13.1  | Del  | 1       |
| <i>EP300</i>    | 22q13.2  | Del  | 1       |
| <i>MKL1</i>     | 22q13.2  | Del  | 1       |
| <i>MUC4</i>     | 3q29     | Amp  | 2       |
| <i>NOTCH1</i>   | 9q34.3   | Del  | 2       |
| <i>TBX3</i>     | 12q24.21 | Del  | 2       |
| <i>HNF1A</i>    | 12q24.31 | Del  | 2       |
| <i>NCOR2</i>    | 12q24.31 | Del  | 2       |
| <i>SETD1B</i>   | 12q24.31 | Del  | 2       |
| <i>POLE</i>     | 12q24.33 | Del  | 2       |
| <i>TP53</i>     | 17p13.1  | SNV  | NA      |

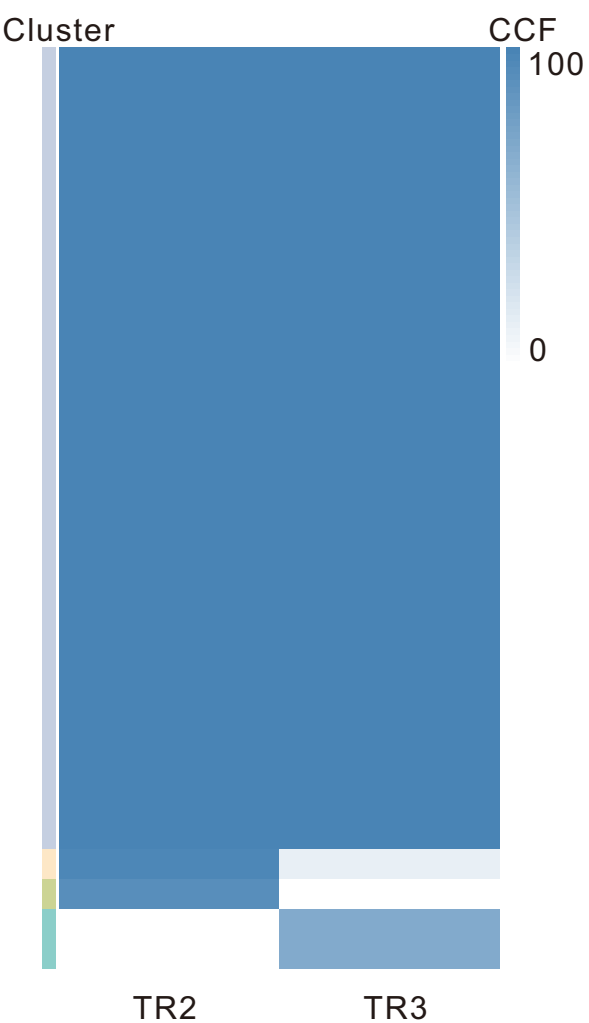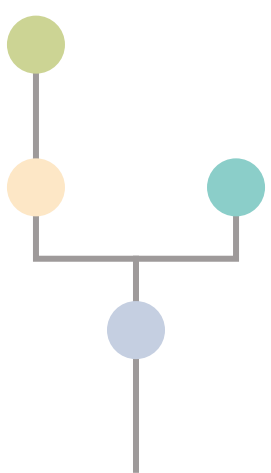

## TR2

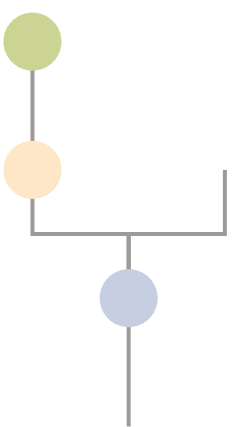

## TR3

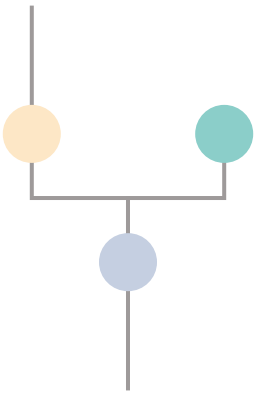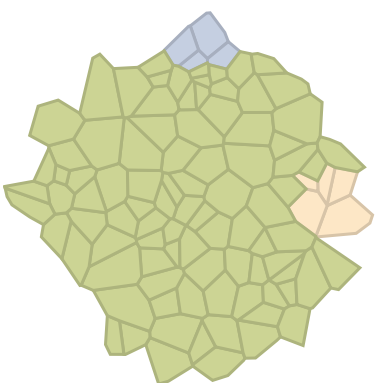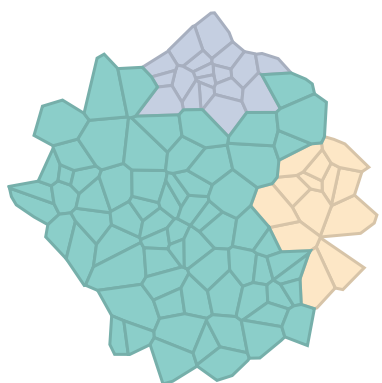

# CRC10

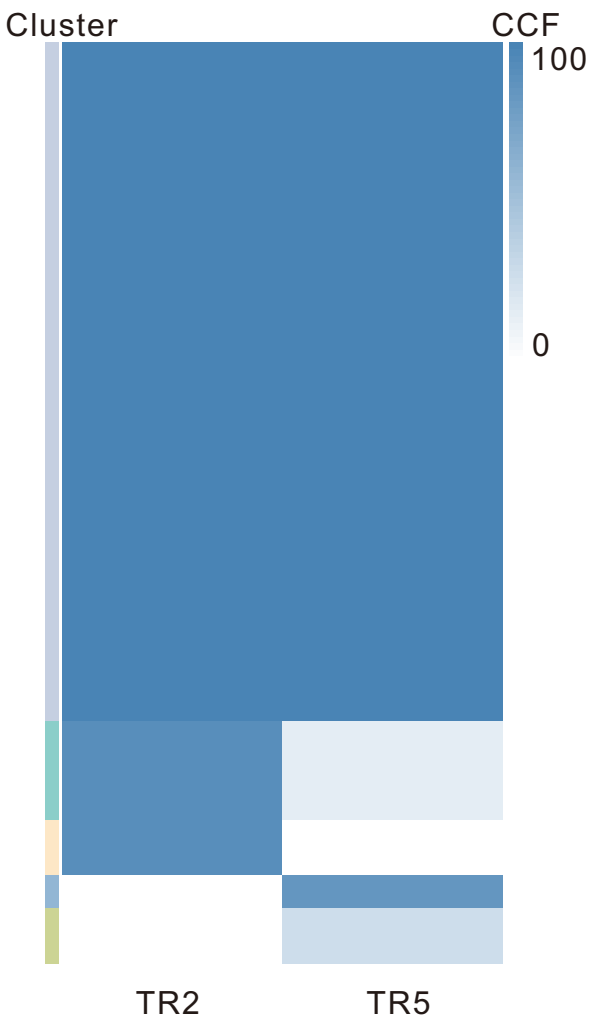

| Gene            | Cytoband | Type  | Cluster |
|-----------------|----------|-------|---------|
| <i>KRAS</i>     | 12p12.1  | SNV   | 1       |
| <i>APC</i>      | 5q22.2   | InDel | 1       |
| <i>FLT3</i>     | 13q12.2  | Amp   | 1       |
| <i>FOXO1</i>    | 13q14.11 | Amp   | 1       |
| <i>CYSLTR2</i>  | 13q14.2  | Amp   | 1       |
| <i>CAMTA1</i>   | 1p36.31  | Del   | 1       |
| <i>RPL22</i>    | 1p36.31  | Del   | 1       |
| <i>TNFRSF14</i> | 1p36.32  | Del   | 1       |
| <i>FLCN</i>     | 17p11.2  | Del   | 1       |
| <i>NCOR1</i>    | 17p11.2  | Del   | 1       |
| <i>MAP2K4</i>   | 17p12    | Del   | 1       |
| <i>PER1</i>     | 17p13.1  | Del   | 1       |
| <i>TP53</i>     | 17p13.1  | Del   | 1       |
| <i>YWHAE</i>    | 17p13.3  | Del   | 1       |
| <i>TSC1</i>     | 9q34.13  | Del   | 2       |
| <i>NOTCH1</i>   | 9q34.3   | Del   | 2       |
| <i>AXIN1</i>    | 16p13.3  | Del   | 2       |
| <i>STK11</i>    | 19p13.3  | Del   | 2       |
| <i>TCF3</i>     | 19p13.3  | Del   | 2       |

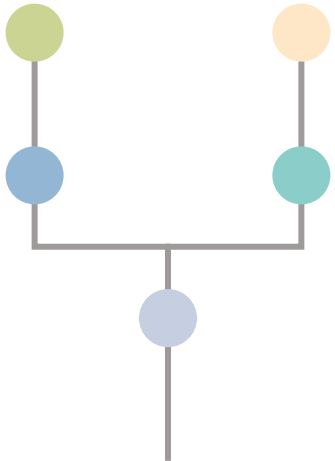

## TR2

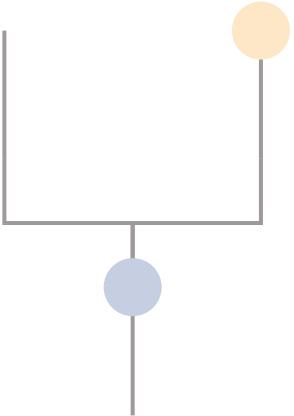

## TR5

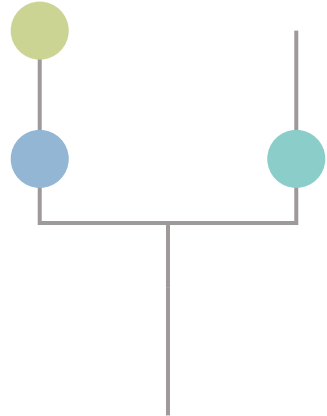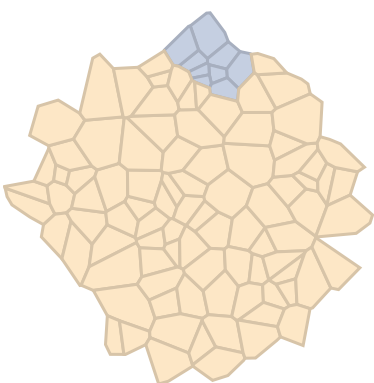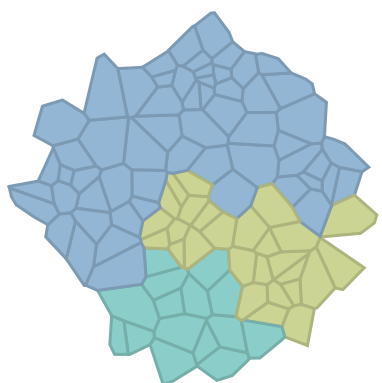



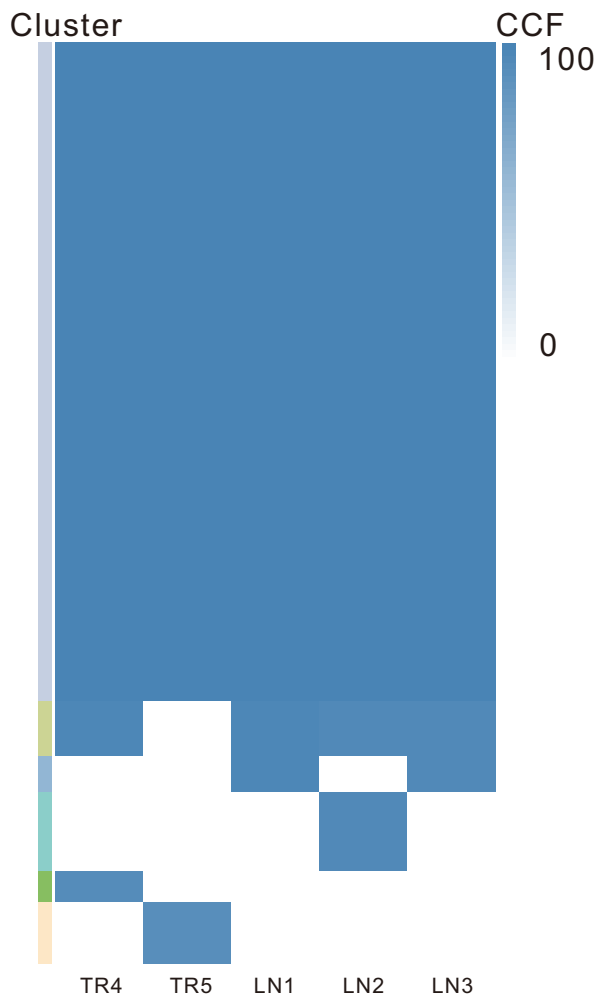

# CRC11

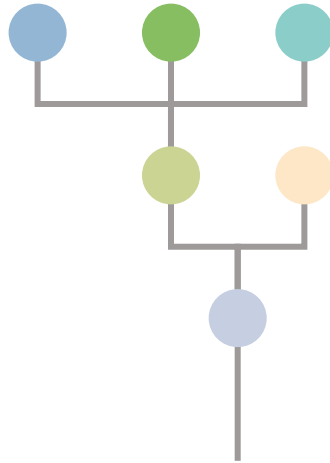

| Gene     | Cytoband | Type  | Cluster |
|----------|----------|-------|---------|
| * APC    | 5q22.2   | SNV   | 1       |
| BRAF     | 7q34     | SNV   | 1       |
| ZFHX3    | 16q22.2  | SNV   | 1       |
| * SMAD4  | 18q21.2  | SNV   | 1       |
| * SMAD4  | 18q21.2  | SNV   | 1       |
| * APC    | 5q22.2   | InDel | 1       |
| PAX5     | 9p13.2   | Amp   | 1       |
| PSIP1    | 9p22.3   | Amp   | 1       |
| JAK2     | 9p24.1   | Amp   | 1       |
| PDCD1LG2 | 9p24.1   | Amp   | 1       |
| GNAQ     | 9q21.2   | Amp   | 1       |
| SYK      | 9q22.2   | Amp   | 1       |
| NR4A3    | 9q31.1   | Amp   | 1       |
| KLF4     | 9q31.2   | Amp   | 1       |
| TAL2     | 9q31.2   | Amp   | 1       |
| TNC      | 9q33.1   | Amp   | 1       |
| SET      | 9q34.11  | Amp   | 1       |
| ABL1     | 9q34.12  | Amp   | 1       |
| BRD3     | 9q34.2   | Amp   | 1       |
| NOTCH1   | 9q34.3   | Amp   | 1       |
| FLT3     | 13q12.2  | Amp   | 2       |
| FOXO1    | 13q14.11 | Amp   | 2       |
| CYSLTR2  | 13q14.2  | Amp   | 2       |
| SDHA     | 5p15.33  | Del   | 3       |
| MUC4     | 3q29     | Amp   | NA      |
| PLAG1    | 8q12.1   | Amp   | NA      |
| PREX2    | 8q13.2   | Amp   | NA      |
| NCOA2    | 8q13.3   | Amp   | NA      |
| HEY1     | 8q21.13  | Amp   | NA      |
| RUNX1T1  | 8q21.3   | Amp   | NA      |
| CDH17    | 8q22.1   | Amp   | NA      |
| PABPC1   | 8q22.3   | Amp   | NA      |
| UBR5     | 8q22.3   | Amp   | NA      |
| RAD21    | 8q24.11  | Amp   | NA      |
| AXIN1    | 16p13.3  | Del   | NA      |

## TR4

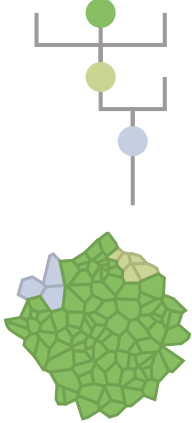

## TR5

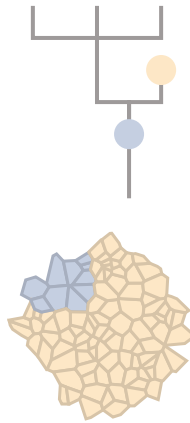

## LN1

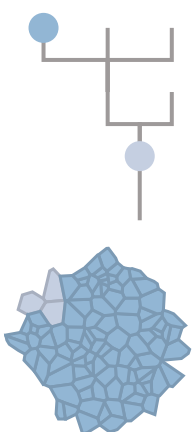

## LN2

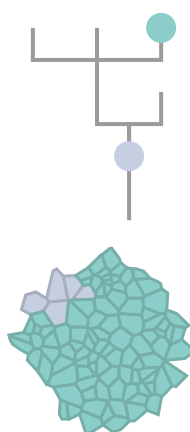

## LN3

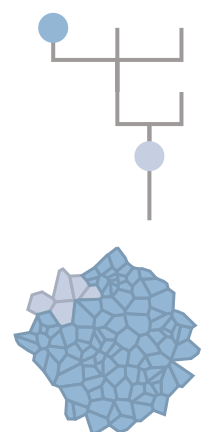

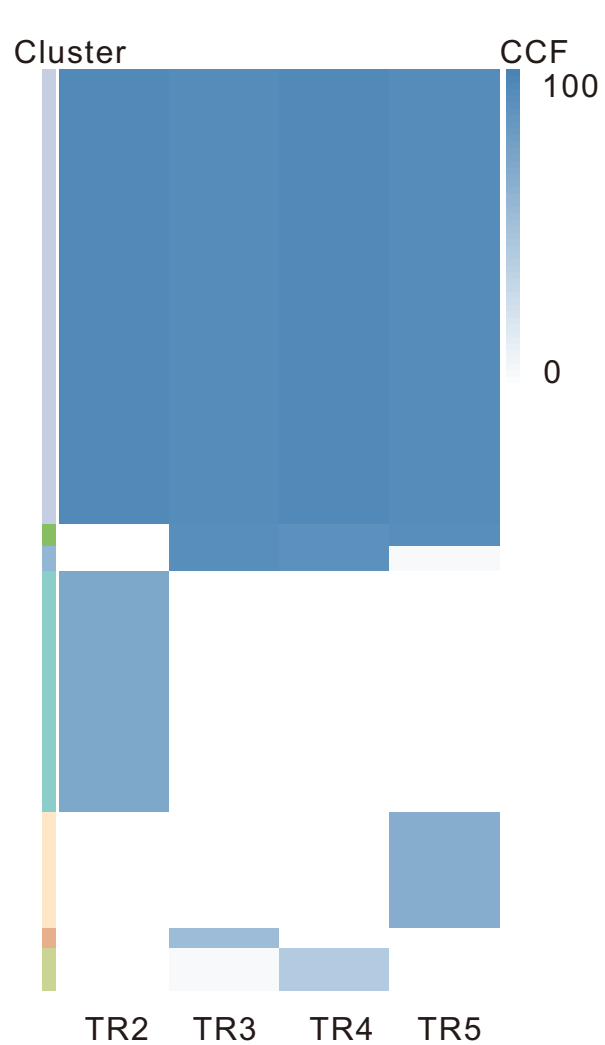

# CRC12

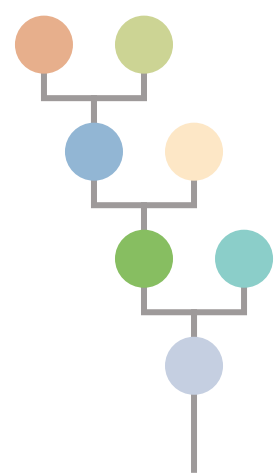

| Gene    | Cytoband | Type  | Cluster |
|---------|----------|-------|---------|
| IDH1    | 2q34     | SNV   | 1       |
| BRAF    | 7q34     | SNV   | 1       |
| ARID2   | 12q12    | SNV   | 1       |
| RNF43   | 17q22    | SNV   | 1       |
| SMAD4   | 18q21.2  | SNV   | 1       |
| TP53    | 17p13.1  | InDel | 1       |
| CREB3L2 | 7q33     | Amp   | 1       |
| TRIM24  | 7q33     | Amp   | 1       |
| BRAF    | 7q34     | Amp   | 1       |
| EZH2    | 7q36.1   | Amp   | 1       |
| RUNX1T1 | 8q21.3   | Amp   | 1       |
| CDH17   | 8q22.1   | Amp   | 1       |
| PABPC1  | 8q22.3   | Amp   | 1       |
| UBR5    | 8q22.3   | Amp   | 1       |
| RAD21   | 8q24.11  | Amp   | 1       |
| MYC     | 8q24.21  | Amp   | 1       |
| RECQL4  | 8q24.3   | Amp   | 1       |
| FLT3    | 13q12.2  | Amp   | 1       |
| FOXO1   | 13q14.11 | Amp   | 1       |
| CYSLTR2 | 13q14.2  | Amp   | 1       |
| ELK4    | 1q32.1   | Amp   | 2       |
| MDM4    | 1q32.1   | Amp   | 2       |
| ROBO2   | 3p12.3   | SNV   | 3       |
| FAT4    | 4q28.1   | SNV   | 4       |
| PRDM16  | 1p36.32  | Amp   | NA      |
| ARNT    | 1q21.3   | Amp   | NA      |
| SETDB1  | 1q21.3   | Amp   | NA      |
| FCRL4   | 1q23.1   | Amp   | NA      |
| NTRK1   | 1q23.1   | Amp   | NA      |
| DDR2    | 1q23.3   | Amp   | NA      |
| FCGR2B  | 1q23.3   | Amp   | NA      |
| PBX1    | 1q23.3   | Amp   | NA      |

## TR2

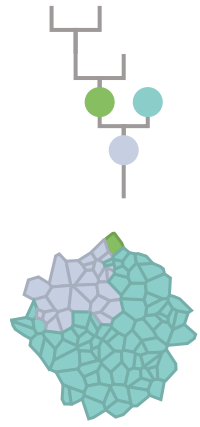

## TR3

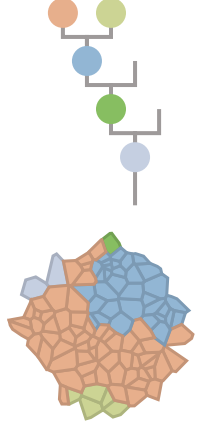

## TR4

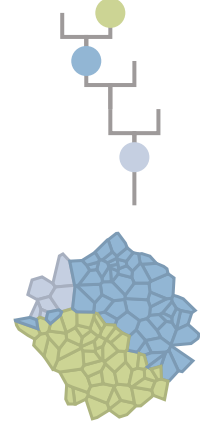

## TR5

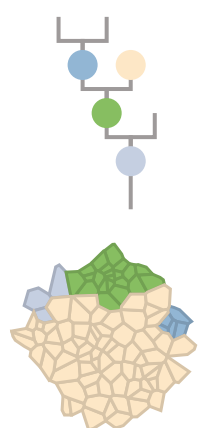

# CRC14

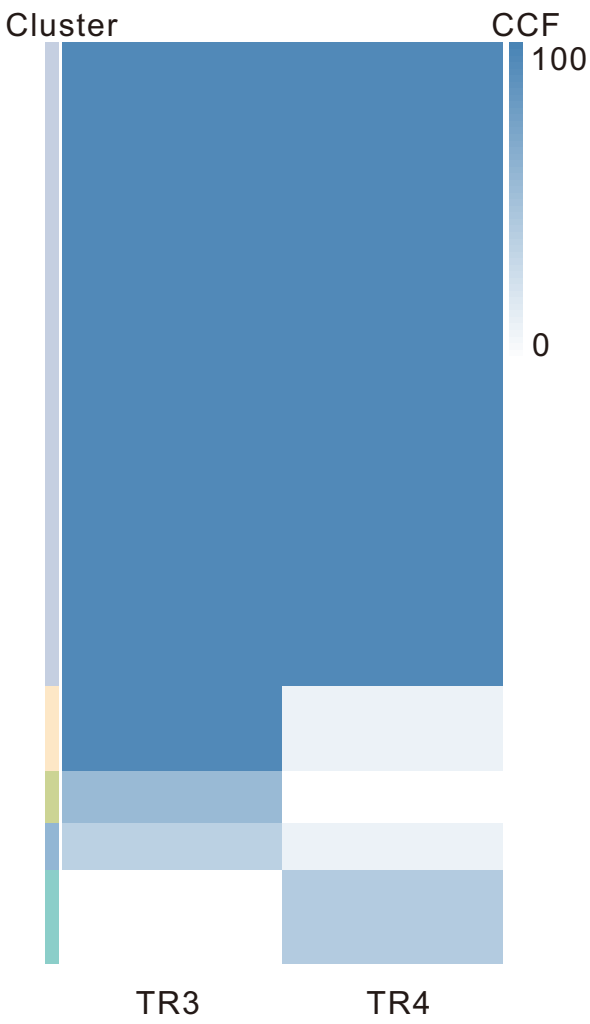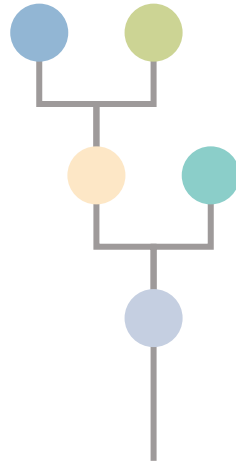

| Gene          | Cytoband | Type | Cluster |
|---------------|----------|------|---------|
| <i>SDHB</i>   | 1p36.13  | SNV  | 1       |
| <i>TP63</i>   | 3q28     | SNV  | 1       |
| <i>APC</i>    | 5q22.2   | SNV  | 1       |
| <i>ESR1</i>   | 6q25.1   | SNV  | 1       |
| <i>DICER1</i> | 14q32.13 | SNV  | 1       |
| <i>TP53</i>   | 17p13.1  | SNV  | 1       |
| <i>IKKB</i>   | 8p11.21  | Amp  | 1       |
| <i>KAT6A</i>  | 8p11.21  | Amp  | 1       |
| <i>FGFR1</i>  | 8p11.23  | Amp  | 1       |
| <i>SRC</i>    | 20q11.23 | Amp  | 1       |
| <i>MAFB</i>   | 20q12    | Amp  | 1       |
| <i>PLCG1</i>  | 20q12    | Amp  | 1       |
| <i>NFATC2</i> | 20q13.2  | Amp  | 1       |
| <i>SALL4</i>  | 20q13.2  | Amp  | 1       |
| <i>GNAS</i>   | 20q13.32 | Amp  | 1       |
| <i>PTK6</i>   | 20q13.33 | Amp  | 1       |

## TR3

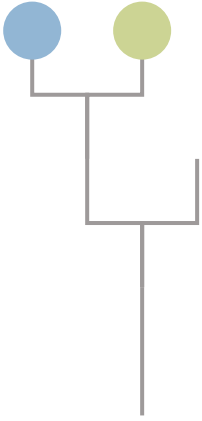

## TR4

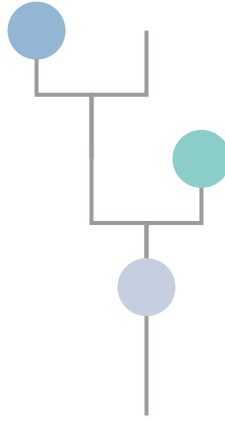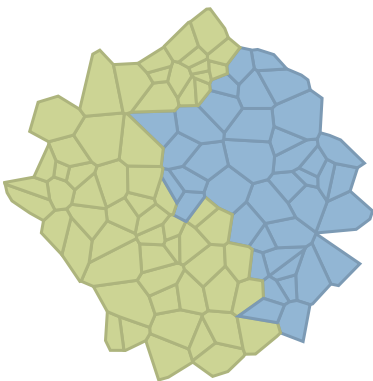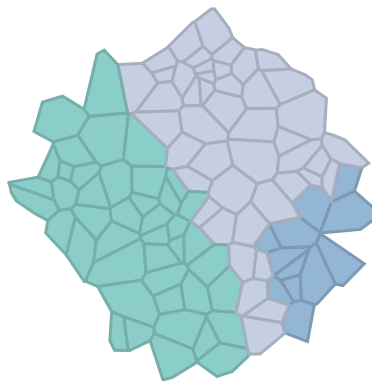

# CRC16

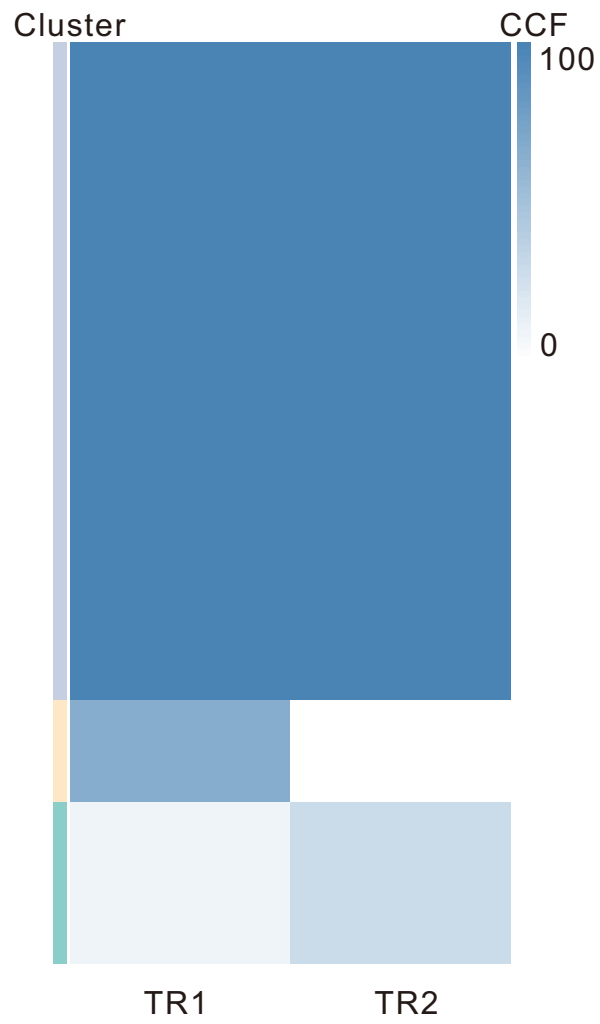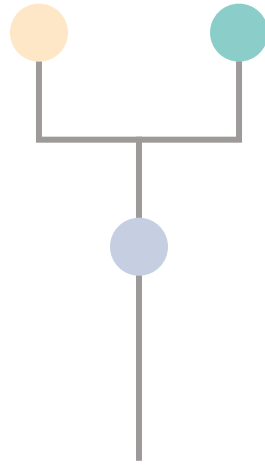

| Gene          | Cytoband | Type | Cluster |
|---------------|----------|------|---------|
| <i>MITF</i>   | 3p13     | SNV  | 1       |
| <i>CTNNB1</i> | 3p22.1   | SNV  | 1       |
| <i>PIK3CA</i> | 3q26.32  | SNV  | 1       |
| <i>APC</i>    | 5q22.2   | SNV  | 1       |
| <i>KRAS</i>   | 12p12.1  | SNV  | 1       |
| <i>RSPO2</i>  | 8q23.1   | SNV  | 2       |

## TR1

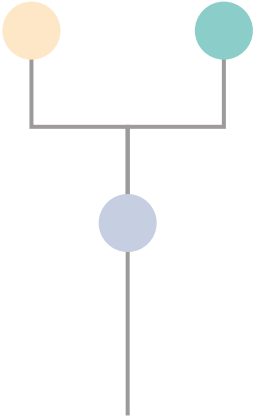

## TR2

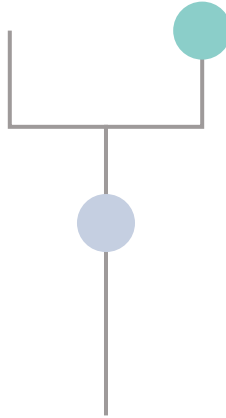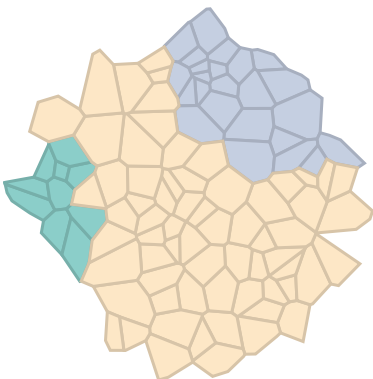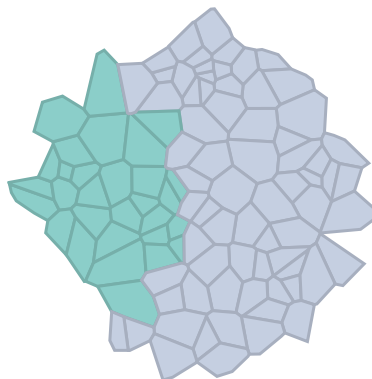

# CRC18

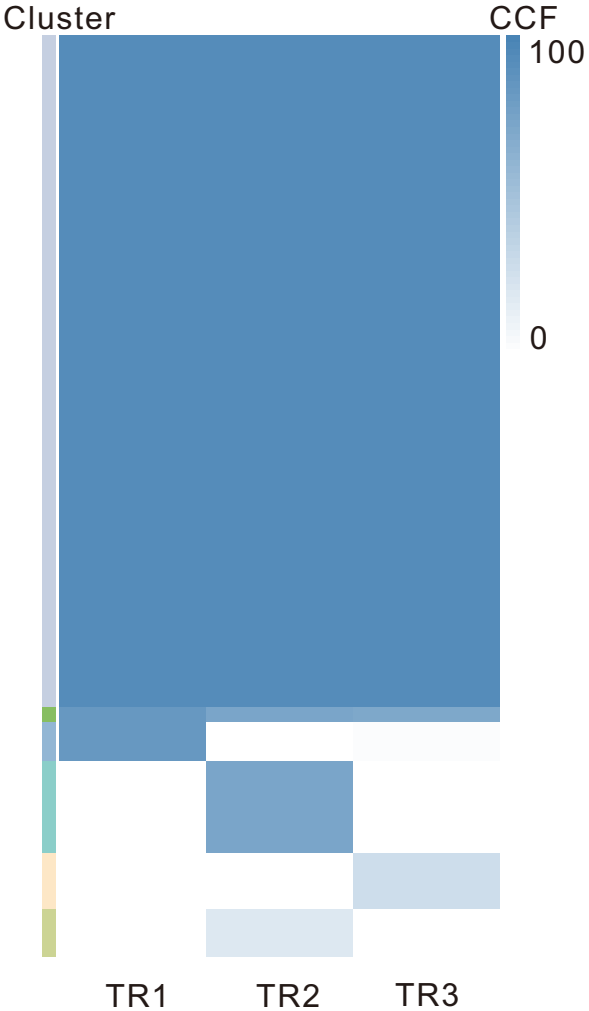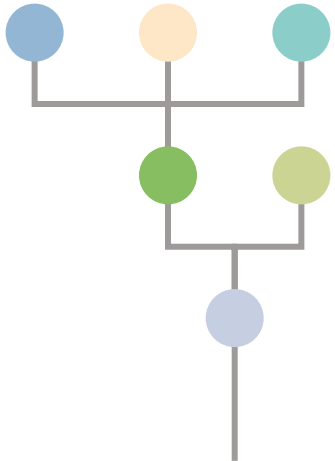

| Gene          | Cytoband | Type  | Cluster |
|---------------|----------|-------|---------|
| <i>CBLB</i>   | 3q13.11  | SNV   | 1       |
| <i>KRAS</i>   | 12p12.1  | SNV   | 1       |
| <i>AKT1</i>   | 14q32.33 | SNV   | 1       |
| <i>TP53</i>   | 17p13.1  | SNV   | 1       |
| <i>APC</i>    | 5q22.2   | InDel | 1       |
| <i>TCF7L2</i> | 10q25.3  | InDel | 1       |
| <i>LRP1B</i>  | 2q22.1   | SNV   | 3       |

## TR1

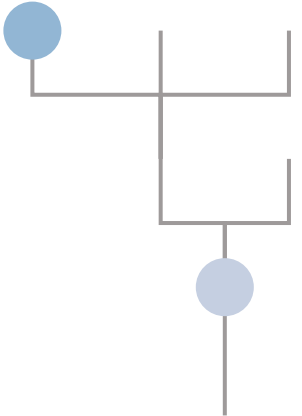

## TR2

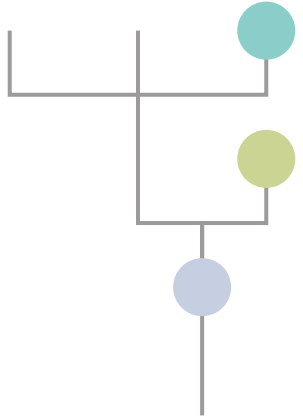

## TR3

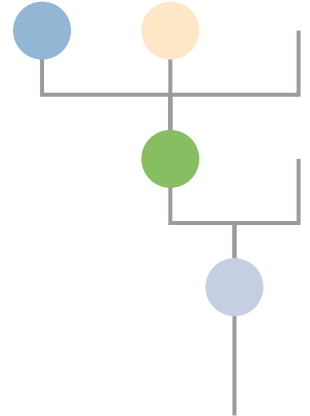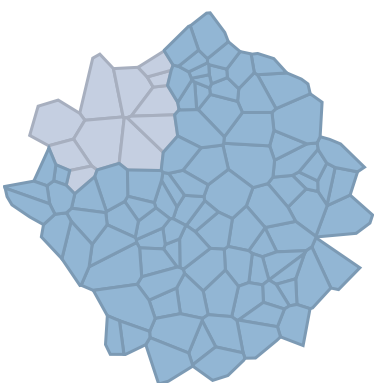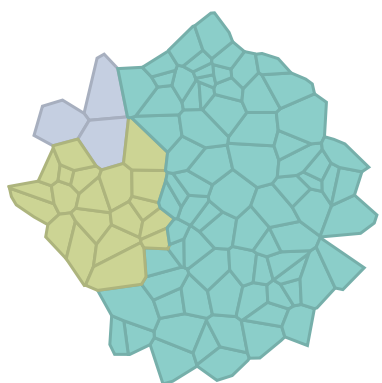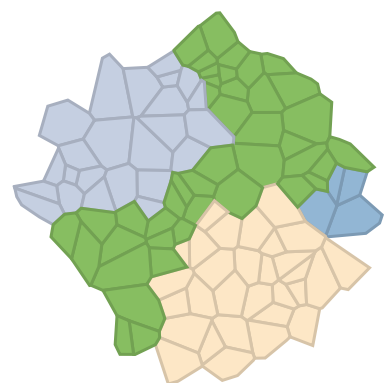

# CRC19

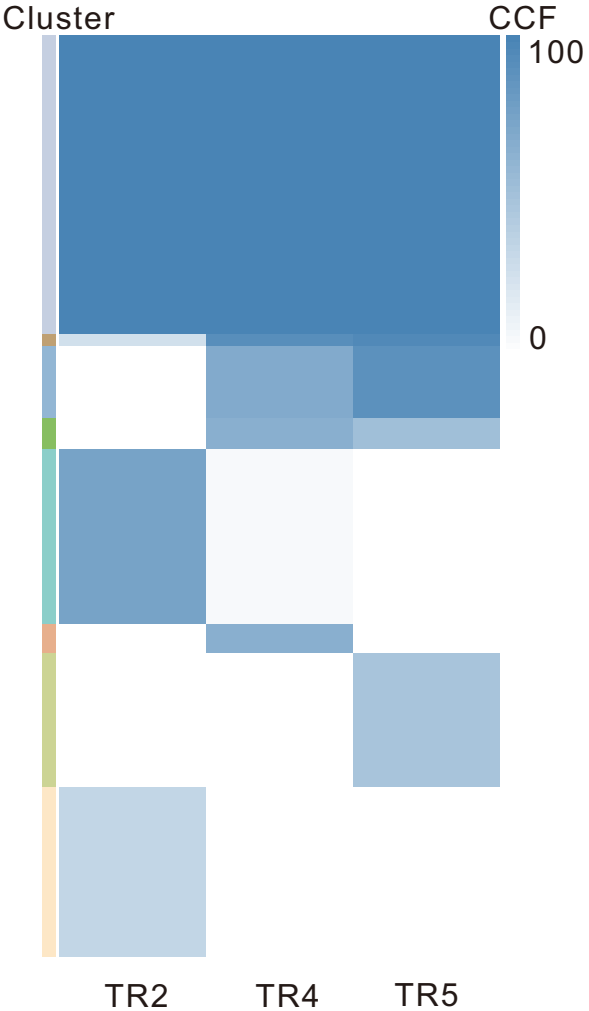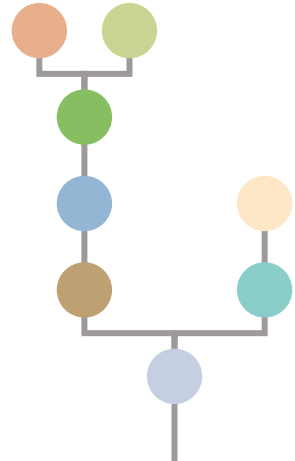

| Gene          | Cytoband | Type | Cluster |
|---------------|----------|------|---------|
| <i>APC</i>    | 5q22.2   | SNV  | 1       |
| <i>KRAS</i>   | 12p12.1  | SNV  | 1       |
| <i>ARID2</i>  | 12q12    | SNV  | 1       |
| <i>FLCN</i>   | 17p11.2  | SNV  | 1       |
| <i>TP53</i>   | 17p13.1  | SNV  | 1       |
| <i>SRC</i>    | 20q11.23 | Amp  | 1       |
| <i>MAFB</i>   | 20q12    | Amp  | 1       |
| <i>PLCG1</i>  | 20q12    | Amp  | 1       |
| <i>NFATC2</i> | 20q13.2  | Amp  | 1       |
| <i>SALL4</i>  | 20q13.2  | Amp  | 1       |
| <i>GNAS</i>   | 20q13.32 | Amp  | 1       |
| <i>PTK6</i>   | 20q13.33 | Amp  | 1       |
| <i>PER1</i>   | 17p13.1  | SNV  | 3       |
| <i>AMER1</i>  | Xq11.2   | SNV  | NA      |

## TR2

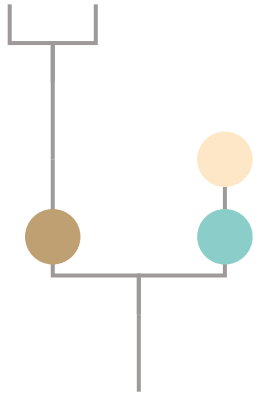

## TR4

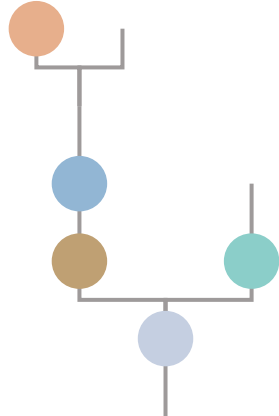

## TR5

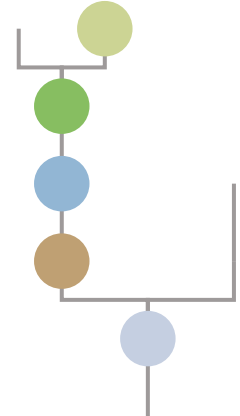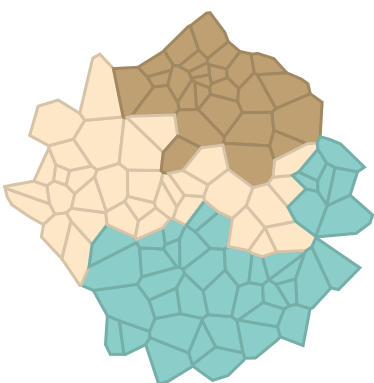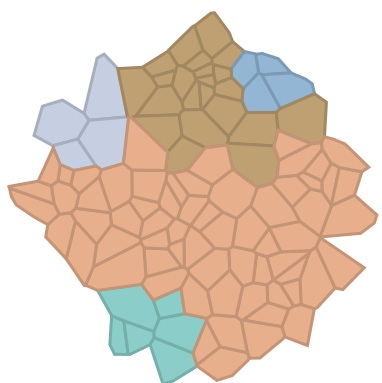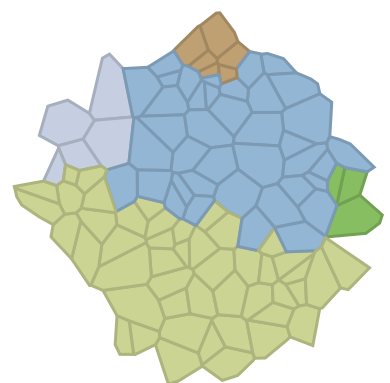

# CRC20

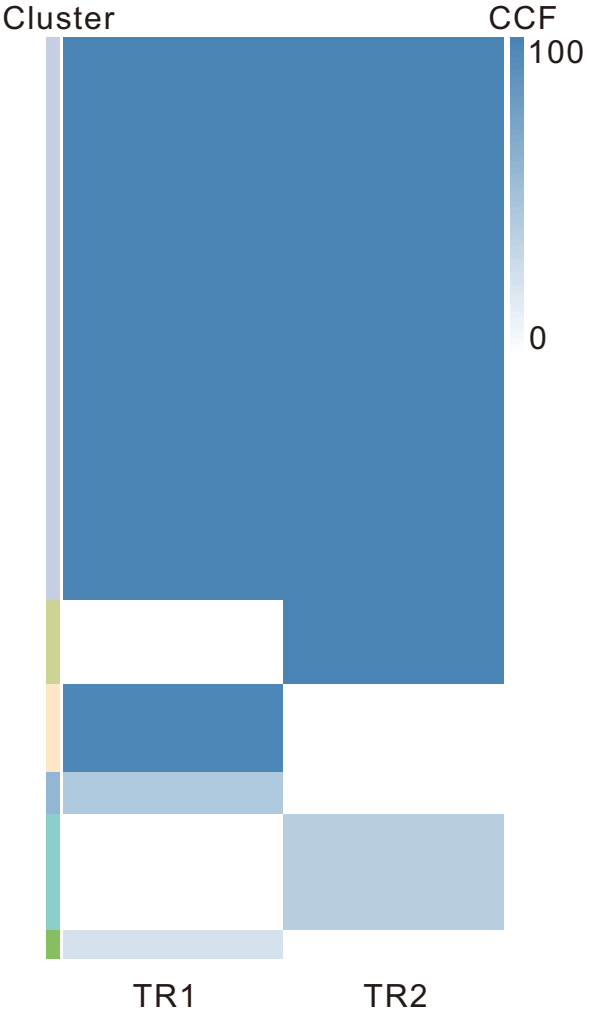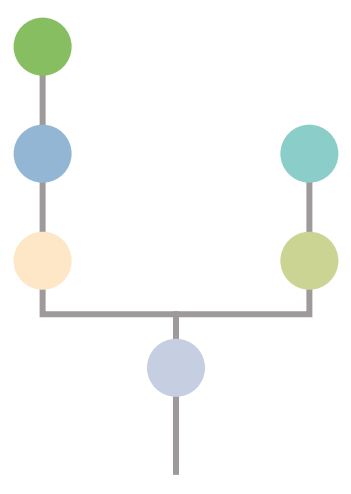

| Gene          | Cytoband | Type | Cluster |
|---------------|----------|------|---------|
| <i>FBXW7</i>  | 4q31.3   | SNV  | 1       |
| <i>APC</i>    | 5q22.2   | SNV  | 1       |
| <i>TP53</i>   | 17p13.1  | SNV  | 1       |
| <i>SRC</i>    | 20q11.23 | Amp  | 1       |
| <i>MAFB</i>   | 20q12    | Amp  | 1       |
| <i>PLCG1</i>  | 20q12    | Amp  | 1       |
| <i>NFATC2</i> | 20q13.2  | Amp  | 1       |
| <i>SALL4</i>  | 20q13.2  | Amp  | 1       |
| <i>GNAS</i>   | 20q13.32 | Amp  | 1       |
| <i>PTK6</i>   | 20q13.33 | Amp  | 1       |

## TR1

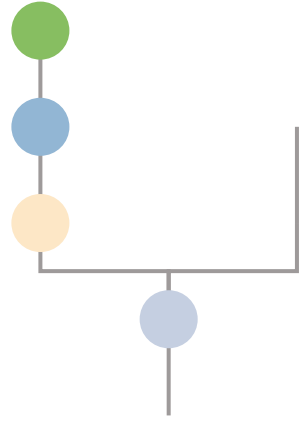

## TR2

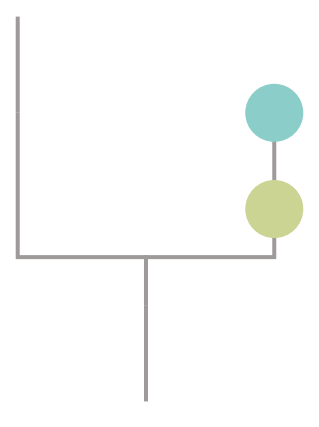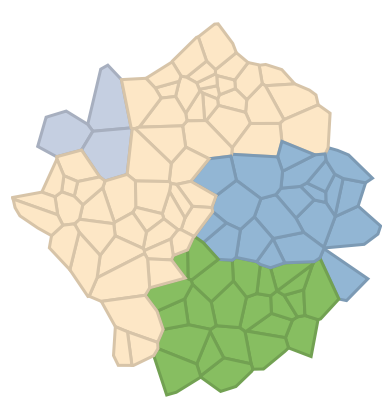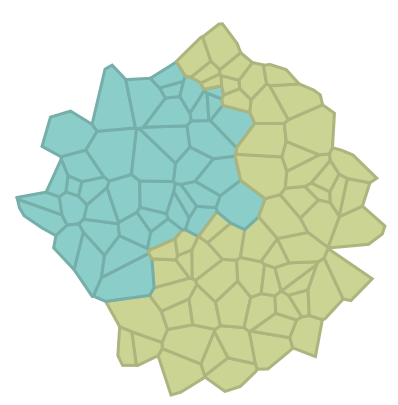

# CRC21

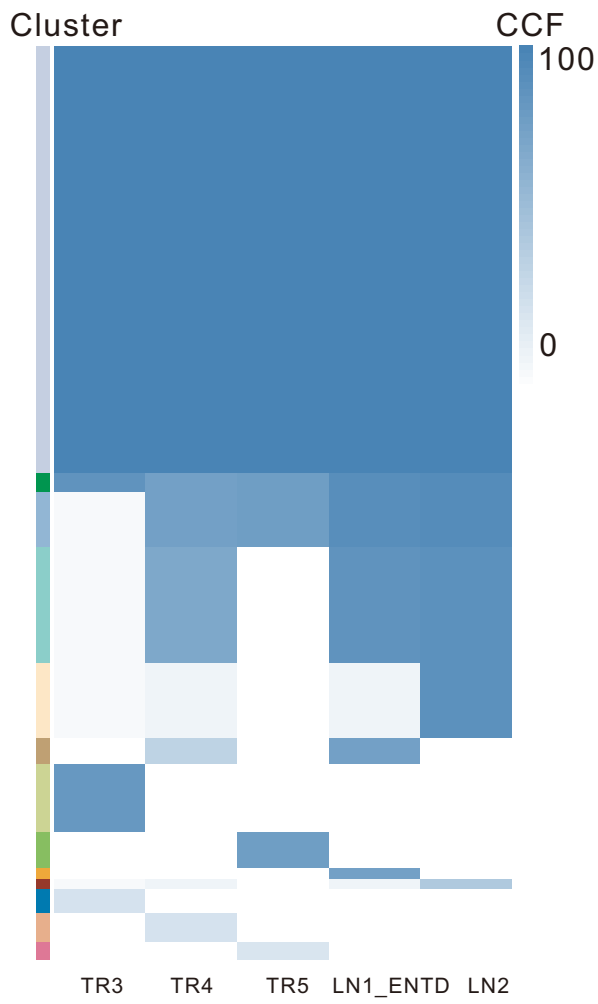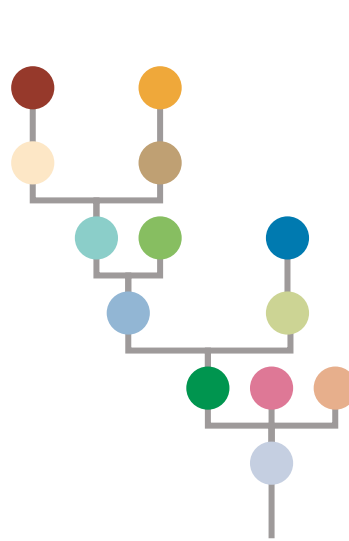

| Gene    | Cytoband | Type  | Cluster |
|---------|----------|-------|---------|
| *ASXL2  | 2p23.3   | SNV   | 1       |
| BRAF    | 7q34     | SNV   | 1       |
| *ASXL2  | 2p23.3   | InDel | 1       |
| TP53    | 17p13.1  | InDel | 1       |
| RNF43   | 17q22    | InDel | 1       |
| NCOA2   | 8q13.3   | Amp   | 1       |
| HEY1    | 8q21.13  | Amp   | 1       |
| RUNX1T1 | 8q21.3   | Amp   | 1       |
| CDH17   | 8q22.1   | Amp   | 1       |
| PABPC1  | 8q22.3   | Amp   | 1       |
| UBR5    | 8q22.3   | Amp   | 1       |
| RAD21   | 8q24.11  | Amp   | 1       |
| MYC     | 8q24.21  | Amp   | 1       |
| RECQL4  | 8q24.3   | Amp   | 1       |
| CCND2   | 12p13.32 | Amp   | 2       |
| KDM5A   | 12p13.33 | Amp   | 2       |
| ERBB4   | 2q34     | SNV   | 3       |
| TSC1    | 9q34.13  | SNV   | 3       |

## TR3

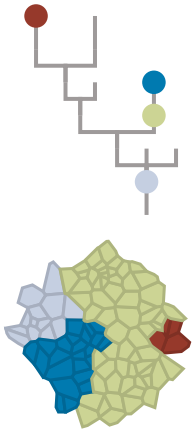

## TR4

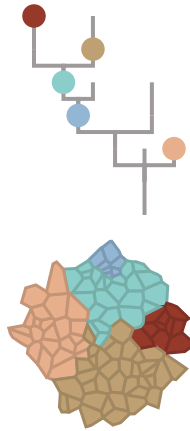

## TR5

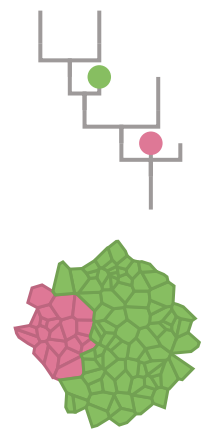

## LN1\_ENTD

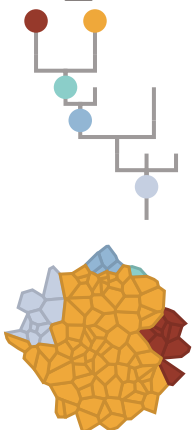

## LN2

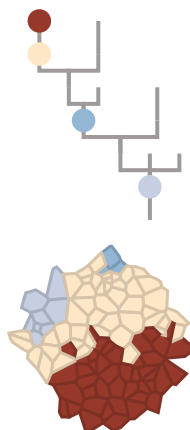



# CRC22

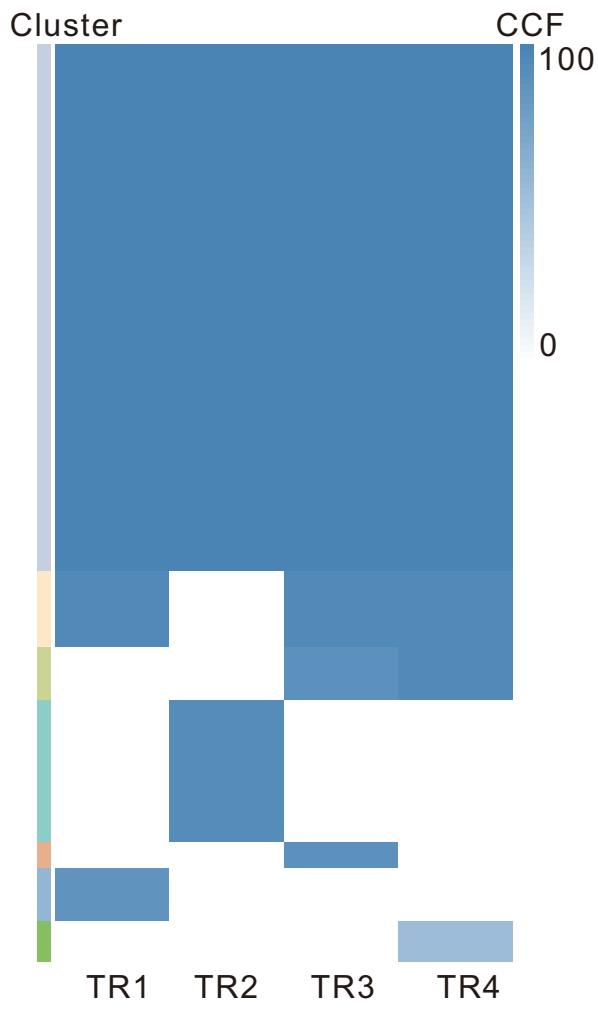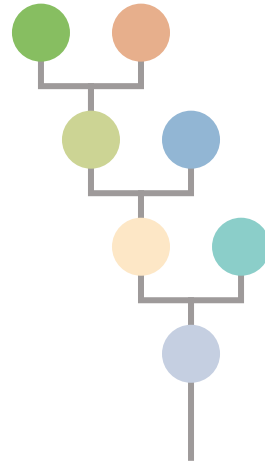

| Gene           | Cytoband | Type | Cluster |
|----------------|----------|------|---------|
| <i>APC</i>     | 5q22.2   | SNV  | 1       |
| <i>KRAS</i>    | 12p12.1  | SNV  | 1       |
| <i>TP53</i>    | 17p13.1  | SNV  | 1       |
| <i>FLT3</i>    | 13q12.2  | Amp  | 1       |
| <i>FOXO1</i>   | 13q14.11 | Amp  | 1       |
| <i>CYSLTR2</i> | 13q14.2  | Amp  | 1       |
| <i>SRC</i>     | 20q11.23 | Amp  | 1       |
| <i>MAFB</i>    | 20q12    | Amp  | 1       |
| <i>PLCG1</i>   | 20q12    | Amp  | 1       |
| <i>NFATC2</i>  | 20q13.2  | Amp  | 1       |
| <i>SALL4</i>   | 20q13.2  | Amp  | 1       |
| <i>GNAS</i>    | 20q13.32 | Amp  | 1       |
| <i>PTK6</i>    | 20q13.33 | Amp  | 1       |
| <i>KMT2D</i>   | 12q13.12 | SNV  | 2       |
| <i>AR</i>      | Xq12     | SNV  | NA      |

## TR1

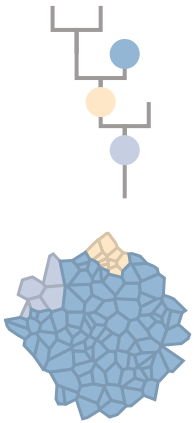

## TR2

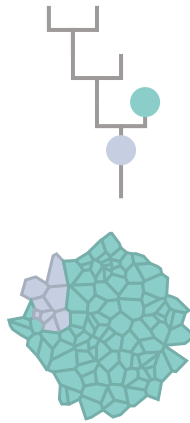

## TR3

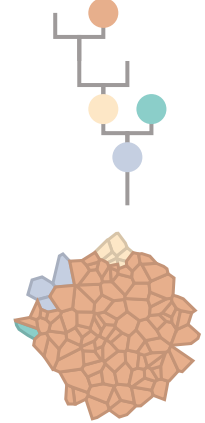

## TR4

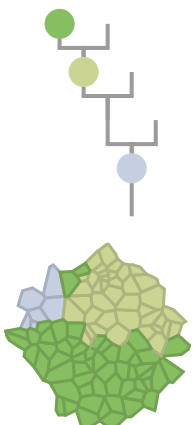

# CRC23

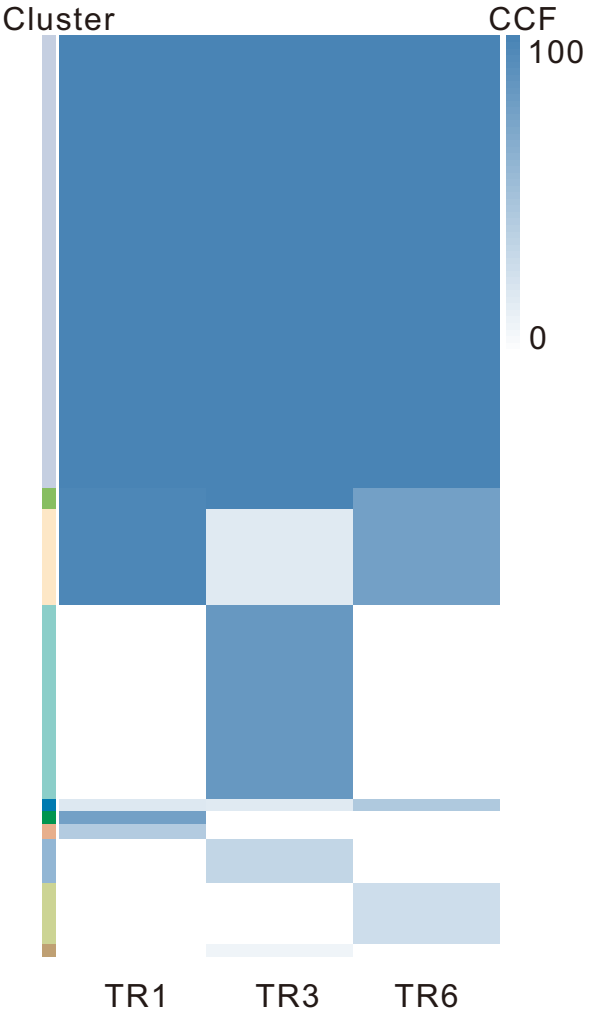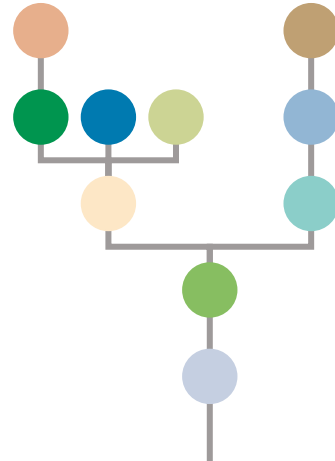

| Gene          | Cytoband | Type  | Cluster |
|---------------|----------|-------|---------|
| <i>ROBO2</i>  | 3p12.3   | SNV   | 1       |
| <i>FAT4</i>   | 4q28.1   | SNV   | 1       |
| <i>APC</i>    | 5q22.2   | SNV   | 1       |
| <i>STAT5B</i> | 17q21.2  | SNV   | 1       |
| <i>BCL9L</i>  | 11q23.3  | InDel | 1       |
| <i>LRP1B</i>  | 2q22.1   | SNV   | 2       |
| <i>MSH6</i>   | 2p16.3   | SNV   | 4       |
| <i>BCORL1</i> | Xq26.1   | SNV   | NA      |

## TR1

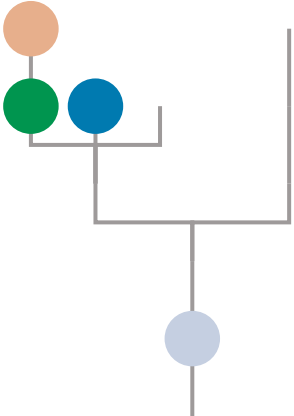

## TR3

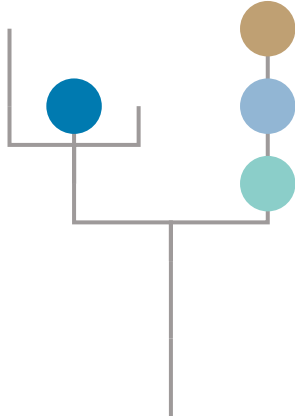

## TR6

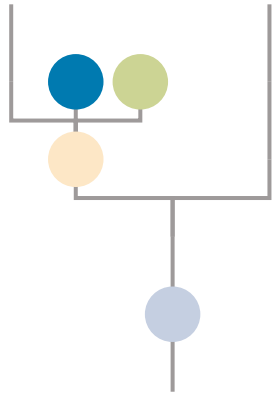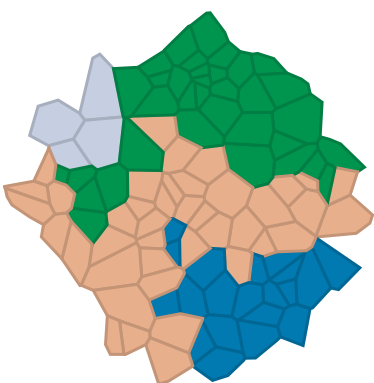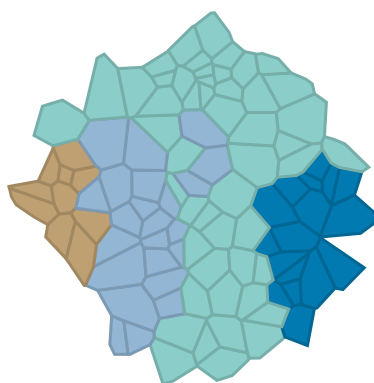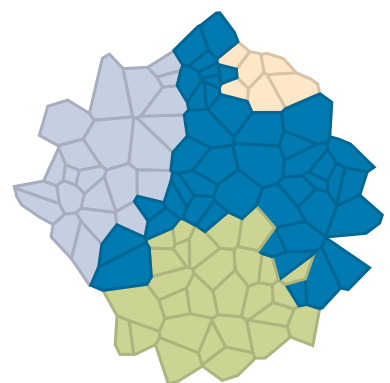

# CRC24

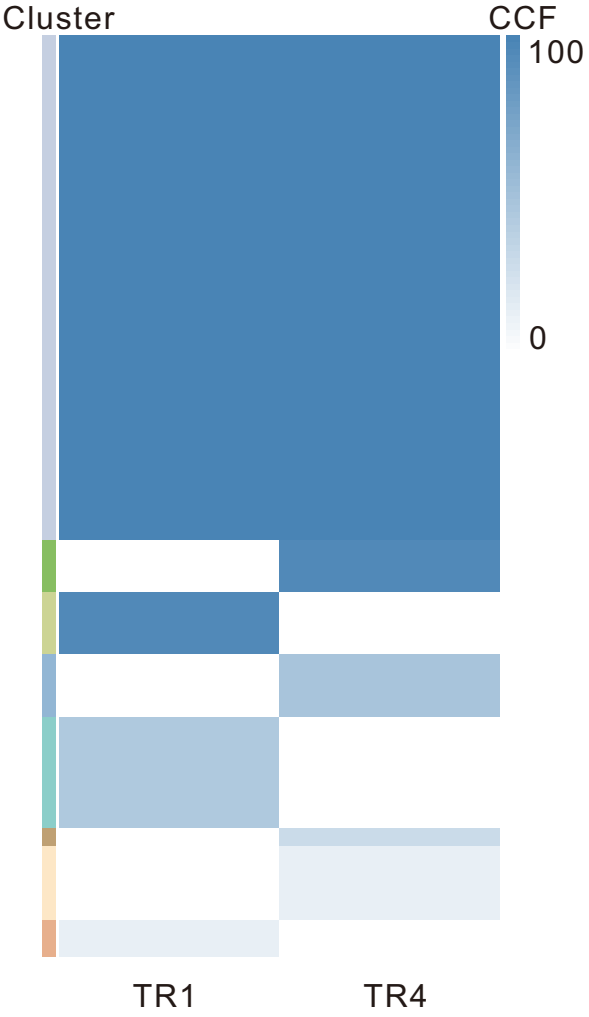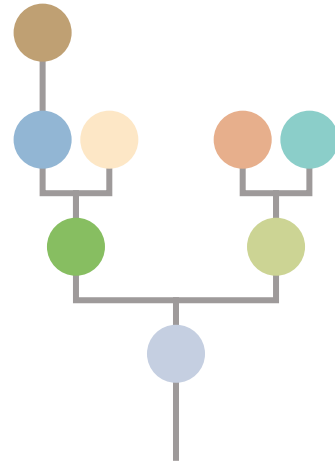

| Gene          | Cytoband | Type | Cluster |
|---------------|----------|------|---------|
| <i>BMPR1A</i> | 10q23.2  | SNV  | 1       |
| <i>KRAS</i>   | 12p12.1  | SNV  | 1       |
| <i>TP53</i>   | 17p13.1  | SNV  | 1       |
| <i>GRIN2A</i> | 16p13.2  | SNV  | 3       |

## TR1

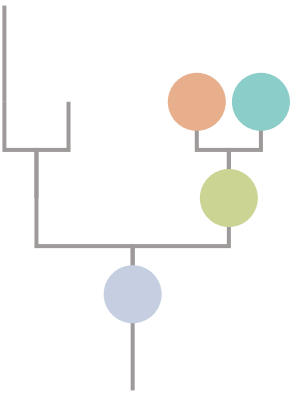

## TR4

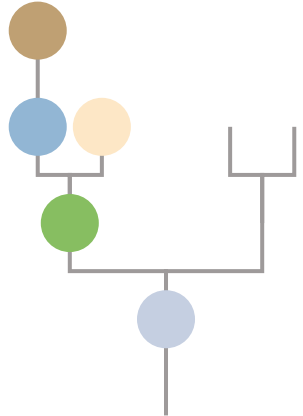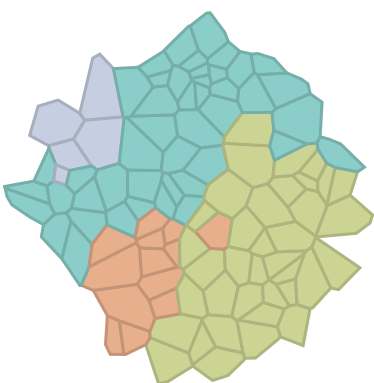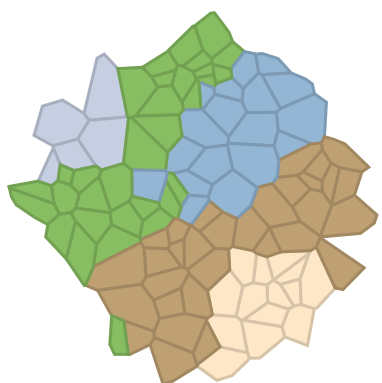

# CRC25

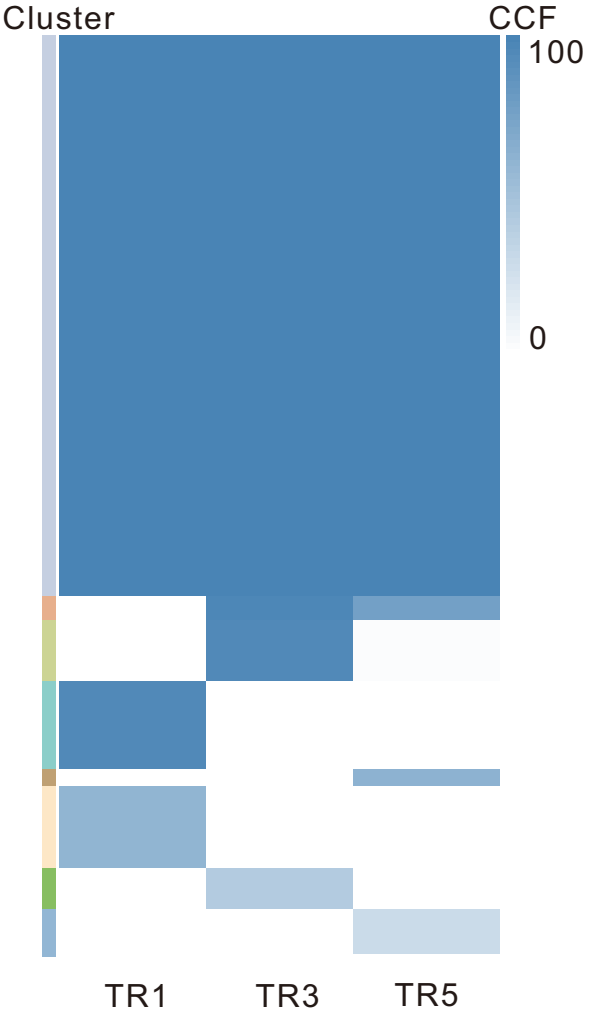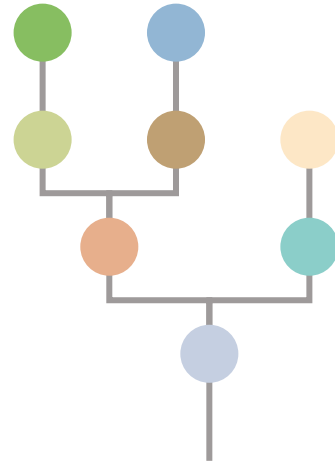

| Gene           | Cytoband | Type  | Cluster |
|----------------|----------|-------|---------|
| <i>ERBB4</i>   | 2q34     | SNV   | 1       |
| <i>KRAS</i>    | 12p12.1  | SNV   | 1       |
| <i>APC</i>     | 5q22.2   | InDel | 1       |
| <i>FLT3</i>    | 13q12.2  | Amp   | 1       |
| <i>FOXO1</i>   | 13q14.11 | Amp   | 1       |
| <i>CYSLTR2</i> | 13q14.2  | Amp   | 1       |
| <i>LRP1B</i>   | 2q22.1   | SNV   | 8       |

## TR1

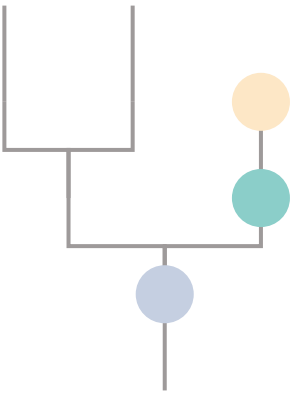

## TR3

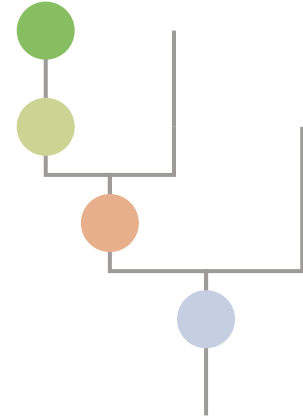

## TR5

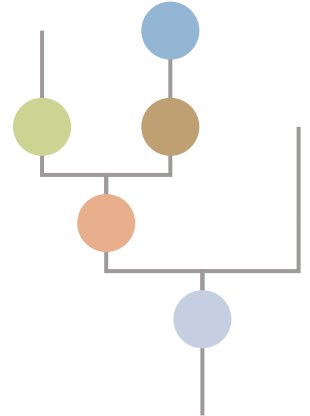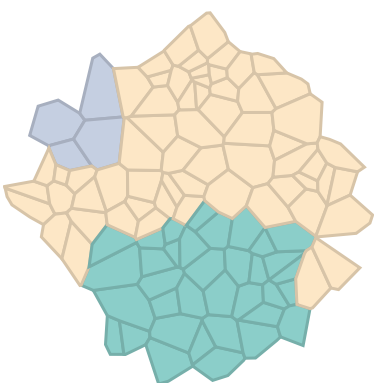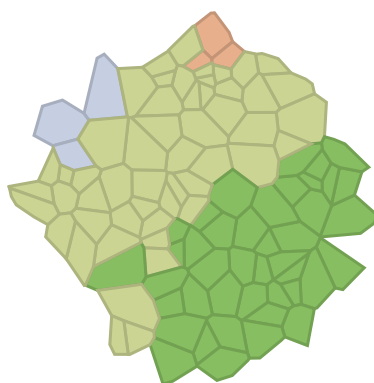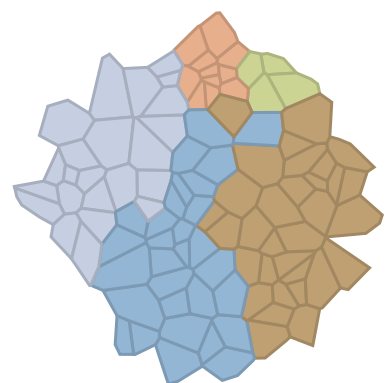

# CRC26

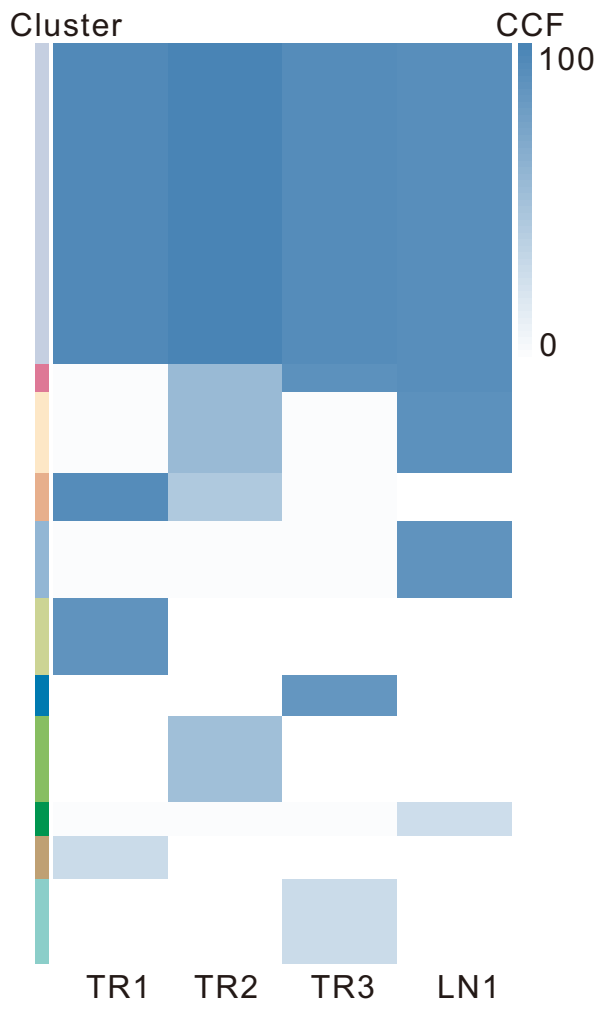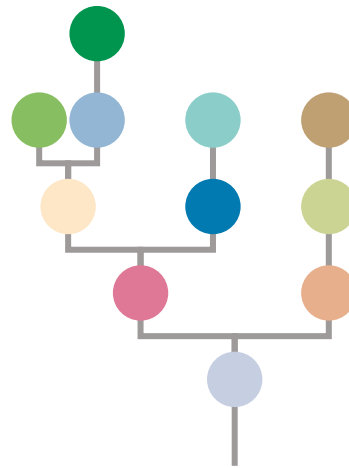

| Gene    | Cytoband | Type  | Cluster |
|---------|----------|-------|---------|
| LEF1    | 4q25     | SNV   | 1       |
| FBXW7   | 4q31.3   | SNV   | 1       |
| *APC    | 5q22.2   | SNV   | 1       |
| KRAS    | 12p12.1  | SNV   | 1       |
| *APC    | 5q22.2   | InDel | 1       |
| TP53    | 17p13.1  | InDel | 1       |
| FLT3    | 13q12.2  | Amp   | 1       |
| CYSLTR2 | 13q14.2  | Amp   | 1       |
| FOXO1   | 13q14.11 | Amp   | 1       |
| CSMD3   | 8q23.3   | SNV   | 3       |
| EIF3E   | 8q23.1   | SNV   | 5       |
| SMAD3   | 15q22.33 | InDel | 6       |
| MUC4    | 3q29     | Amp   | 6       |
| CREB3L2 | 7q33     | Amp   | 6       |
| TRIM24  | 7q33     | Amp   | 6       |
| BRAF    | 7q34     | Amp   | 6       |
| EZH2    | 7q36.1   | Amp   | 6       |
| SRC     | 20q11.23 | Amp   | 6       |
| MAFB    | 20q12    | Amp   | 6       |
| PLCG1   | 20q12    | Amp   | 6       |
| NFATC2  | 20q13.2  | Amp   | 6       |
| SALL4   | 20q13.2  | Amp   | 6       |
| GNAS    | 20q13.32 | Amp   | 6       |
| PTK6    | 20q13.33 | Amp   | 6       |
| AXIN1   | 16p13.3  | Del   | 7       |
| FGFR1   | 8p11.23  | Amp   | NA      |

## TR1

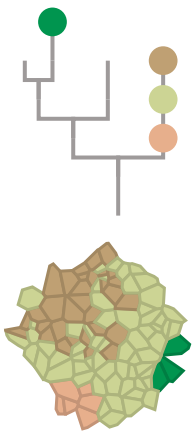

## TR2

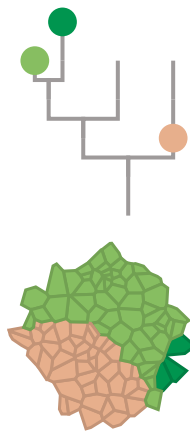

## TR3

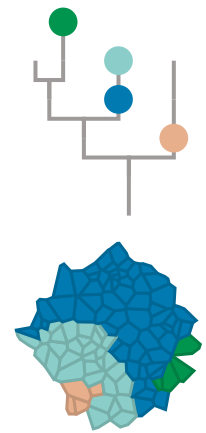

## LN1

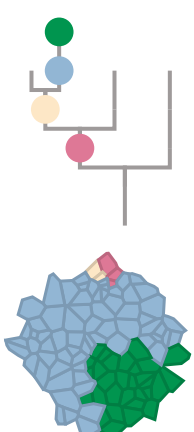

# CRC27

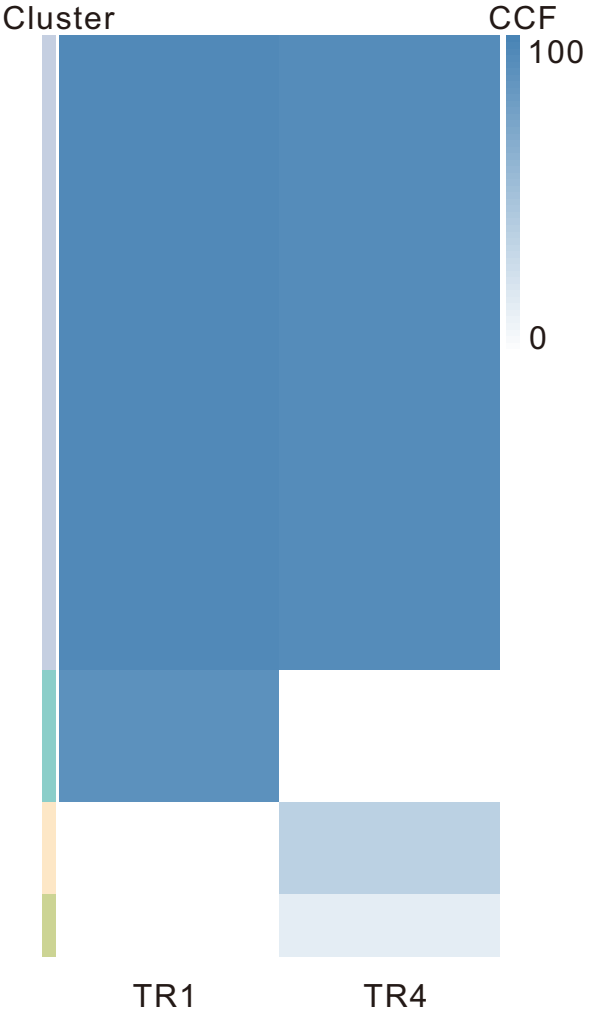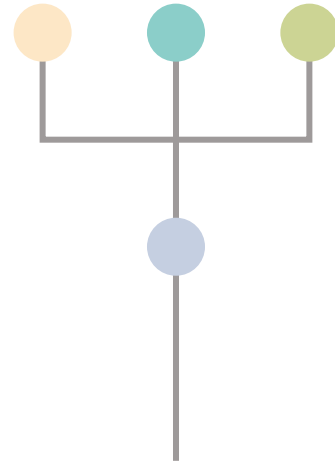

| Gene   | Cytoband | Type  | Cluster |
|--------|----------|-------|---------|
| * APC  | 5q22.2   | SNV   | 1       |
| * TP53 | 17p13.1  | SNV   | 1       |
| * TP53 | 17p13.1  | SNV   | 1       |
| * APC  | 5q22.2   | InDel | 1       |
| LZTR1  | 22q11.21 | InDel | 1       |
| MUC4   | 3q29     | Amp   | 1       |
| SRC    | 20q11.23 | Amp   | 1       |
| MAFB   | 20q12    | Amp   | 1       |
| PLCG1  | 20q12    | Amp   | 1       |
| NFATC2 | 20q13.2  | Amp   | 1       |
| SALL4  | 20q13.2  | Amp   | 1       |
| SSX2   | Xp11.22  | Amp   | 1       |
| ARAF   | Xp11.23  | Amp   | 1       |
| GATA1  | Xp11.23  | Amp   | 1       |
| SSX1   | Xp11.23  | Amp   | 1       |
| SSX4   | Xp11.23  | Amp   | 1       |
| TFE3   | Xp11.23  | Amp   | 1       |
| WAS    | Xp11.23  | Amp   | 1       |
| KDM6A  | Xp11.3   | Amp   | 1       |
| IRS4   | Xq22.3   | Del   | 1       |
| STAG2  | Xq25     | Del   | 1       |
| BCORL1 | Xq26.1   | Del   | 1       |
| ELF4   | Xq26.1   | Del   | 1       |
| GPC3   | Xq26.2   | Del   | 1       |
| PHF6   | Xq26.2   | Del   | 1       |
| ATP2B3 | Xq28     | Del   | 1       |
| RPL10  | Xq28     | Del   | 1       |
| NOTCH2 | 1p12     | Amp   | NA      |
| BCL9   | 1q21.2   | Amp   | NA      |

## TR1

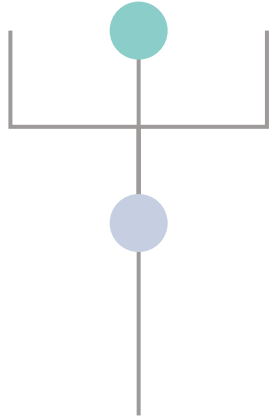

## TR4

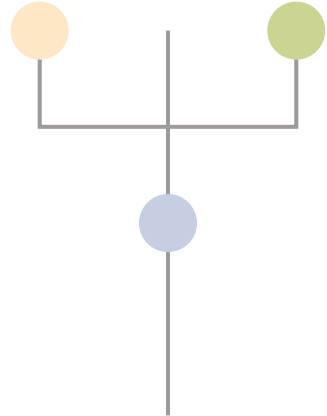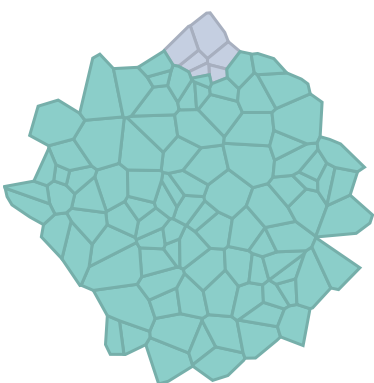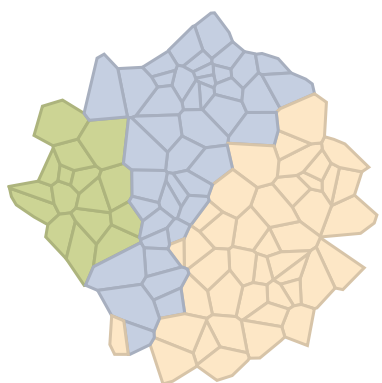

# CRC28

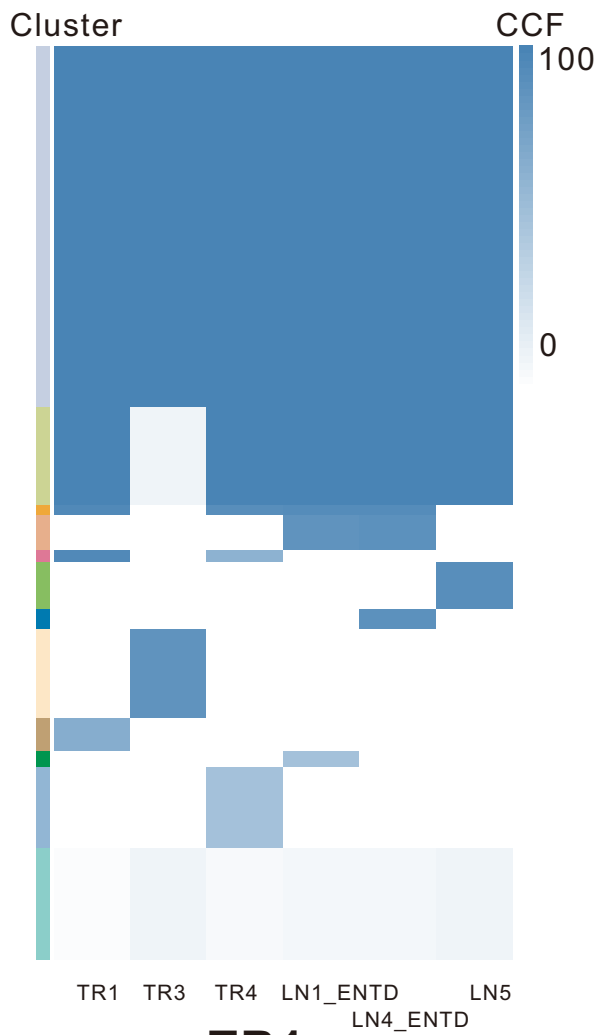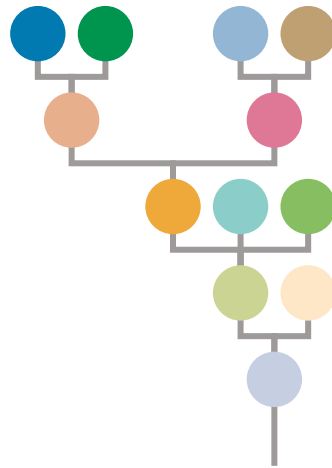

| Gene      | Cytoband | Type | Cluster |
|-----------|----------|------|---------|
| * APC     | 5q22.2   | SNV  | 1       |
| * APC     | 5q22.2   | SNV  | 1       |
| KRAS      | 12p12.1  | SNV  | 1       |
| CLTCL1    | 22q11.21 | SNV  | 1       |
| KRAS      | 12p12.1  | Amp  | 1       |
| CHD4      | 12p13.31 | Amp  | 1       |
| CCND2     | 12p13.32 | Amp  | 1       |
| KDM5A     | 12p13.33 | Amp  | 1       |
| IRS4      | Xq22.3   | Amp  | 1       |
| BCORL1    | Xq26.1   | Amp  | 1       |
| ELF4      | Xq26.1   | Amp  | 1       |
| GPC3      | Xq26.2   | Amp  | 1       |
| FAT4      | 4q28.1   | SNV  | 2       |
| ARID1A    | 1p36.11  | SNV  | 3       |
| ID3       | 1p36.12  | Del  | 4       |
| ARHGEF10L | 1p36.13  | Del  | 4       |
| SDHB      | 1p36.13  | Del  | 4       |
| CAMTA1    | 1p36.31  | Del  | 4       |
| RPL22     | 1p36.31  | Del  | 4       |
| TNFRSF14  | 1p36.32  | Del  | 4       |
| CASP8     | 2q33.1   | SNV  | 6       |
| JAK2      | 9p24.1   | Amp  | 6       |
| PDCD1LG2  | 9p24.1   | Amp  | 6       |
| KDM5C     | Xp11.22  | SNV  | NA      |

## TR1

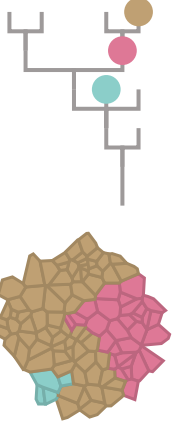

## TR3

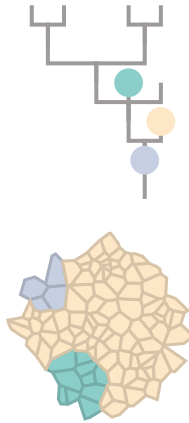

## TR4

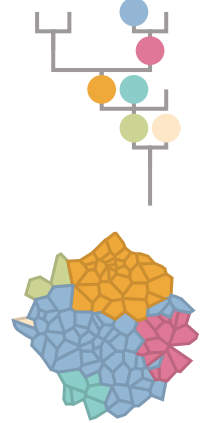

## LN1\_ENTD

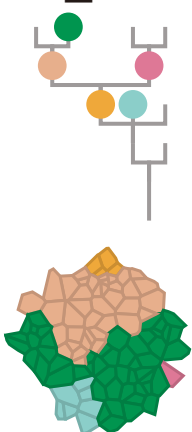

## LN4\_ENTD

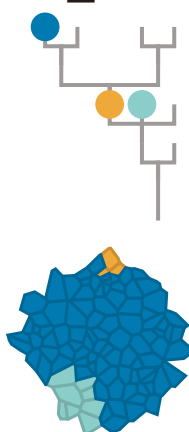

## LN5

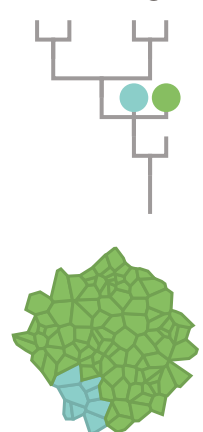

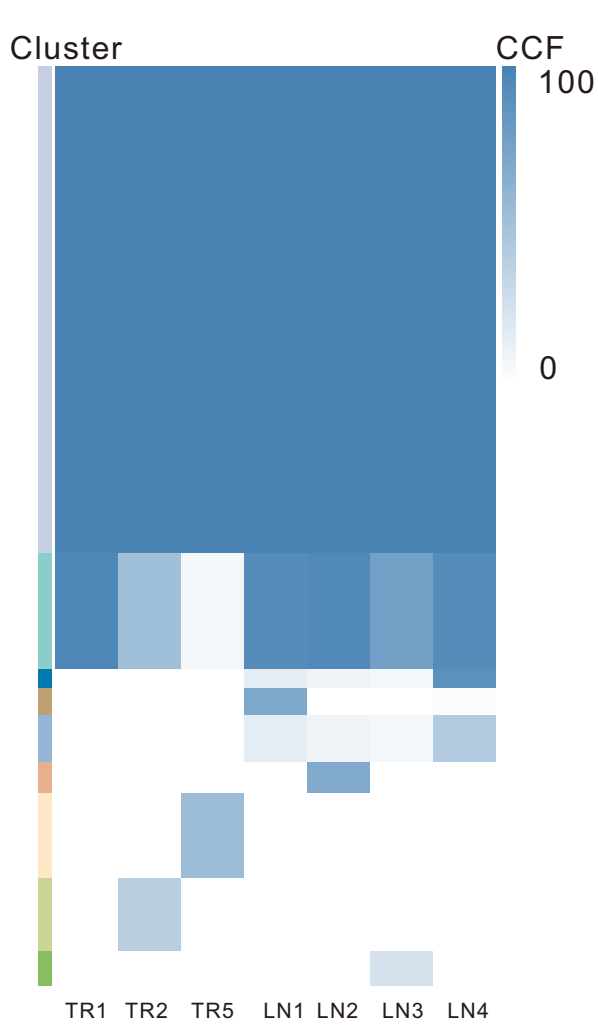

# CRC29

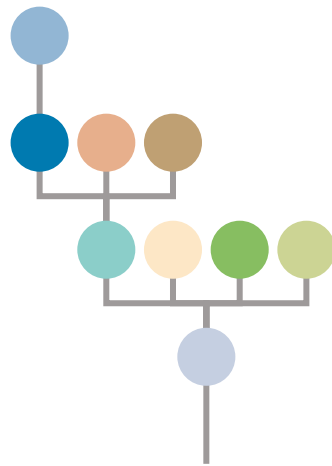

| Gene    | Cytoband | Type  | Cluster |
|---------|----------|-------|---------|
| APC     | 5q22.2   | SNV   | 1       |
| BCL9L   | 11q23.3  | SNV   | 1       |
| NCOR2   | 12q24.31 | SNV   | 1       |
| TP53    | 17p13.1  | SNV   | 1       |
| FLT3    | 13q12.2  | Amp   | 1       |
| SRC     | 20q11.23 | Amp   | 1       |
| MAFB    | 20q12    | Amp   | 1       |
| PLCG1   | 20q12    | Amp   | 1       |
| NFATC2  | 20q13.2  | Amp   | 1       |
| SALL4   | 20q13.2  | Amp   | 1       |
| GNAS    | 20q13.32 | Amp   | 1       |
| PTK6    | 20q13.33 | Amp   | 1       |
| DDX5    | 17q23.3  | Amp   | 2       |
| SMAD3   | 15q22.33 | SNV   | 4       |
| LZTR1   | 22q11.21 | InDel | NA      |
| MUC4    | 3q29     | Amp   | NA      |
| EGFR    | 7p11.2   | Amp   | NA      |
| PLAG1   | 8q12.1   | Amp   | NA      |
| PREX2   | 8q13.2   | Amp   | NA      |
| NCOA2   | 8q13.3   | Amp   | NA      |
| HEY1    | 8q21.13  | Amp   | NA      |
| RUNX1T1 | 8q21.3   | Amp   | NA      |
| CDH17   | 8q22.1   | Amp   | NA      |
| PABPC1  | 8q22.3   | Amp   | NA      |
| UBR5    | 8q22.3   | Amp   | NA      |
| RAD21   | 8q24.11  | Amp   | NA      |
| MYC     | 8q24.21  | Amp   | NA      |
| RECQL4  | 8q24.3   | Amp   | NA      |
| PPM1D   | 17q23.2  | Amp   | NA      |
| CD79B   | 17q23.3  | Amp   | NA      |
| AXIN1   | 16p13.3  | Del   | NA      |
| PRKAR1A | 17q24.2  | Del   | NA      |

**TR1**

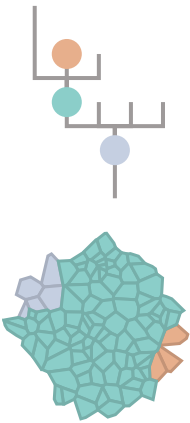

**TR2**

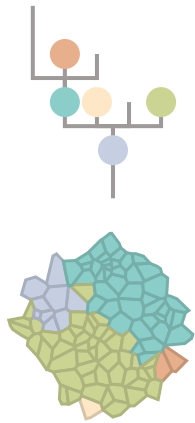

**TR5**

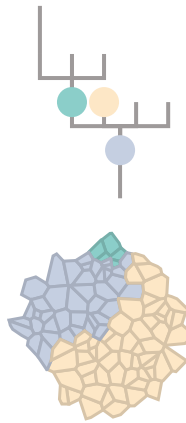

**LN1**

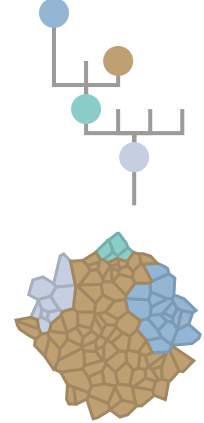

**LN2**

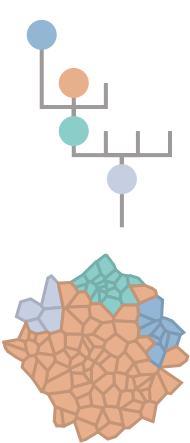

**LN3**

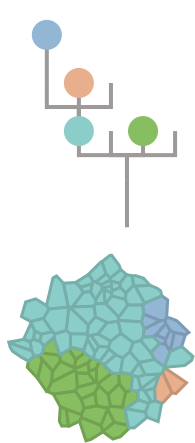

**LN4**

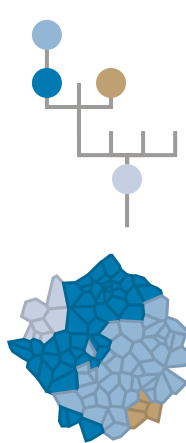



# CRC30

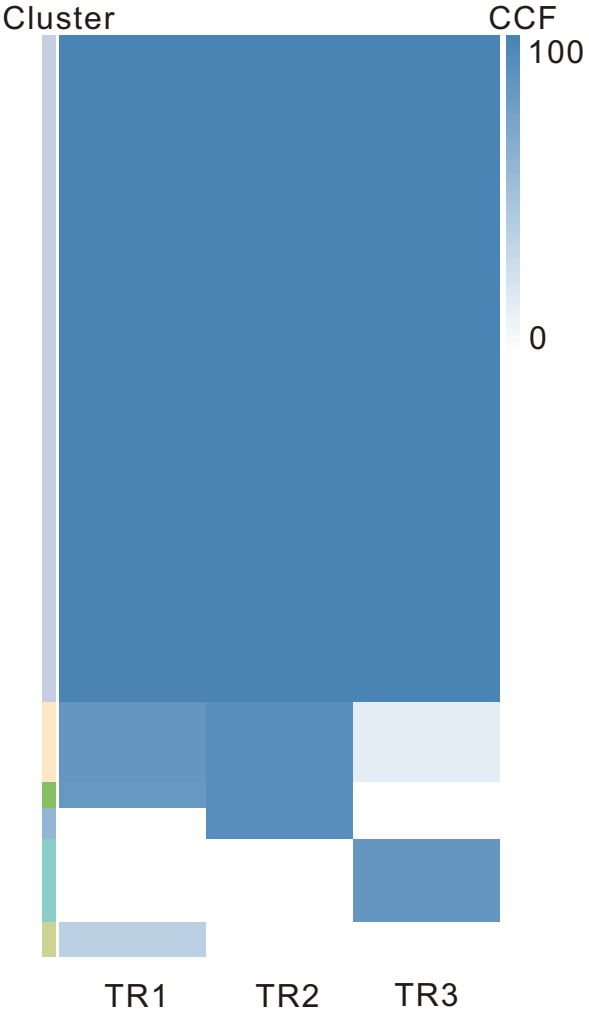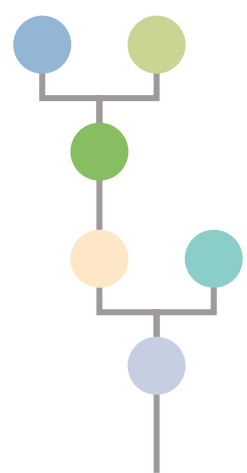

| Gene    | Cytoband | Type | Cluster |
|---------|----------|------|---------|
| APC     | 5q22.2   | SNV  | 1       |
| PTPRB   | 12q15    | SNV  | 1       |
| TP53    | 17p13.1  | SNV  | 1       |
| IL7R    | 5p13.2   | Amp  | 1       |
| IKBKB   | 8p11.21  | Amp  | 1       |
| KAT6A   | 8p11.21  | Amp  | 1       |
| PLAG1   | 8q12.1   | Amp  | 1       |
| PREX2   | 8q13.2   | Amp  | 1       |
| NCOA2   | 8q13.3   | Amp  | 1       |
| HEY1    | 8q21.13  | Amp  | 1       |
| RUNX1T1 | 8q21.3   | Amp  | 1       |
| CDH17   | 8q22.1   | Amp  | 1       |
| PABPC1  | 8q22.3   | Amp  | 1       |
| UBR5    | 8q22.3   | Amp  | 1       |
| RAD21   | 8q24.11  | Amp  | 1       |
| MYC     | 8q24.21  | Amp  | 1       |
| RECQL4  | 8q24.3   | Amp  | 1       |

## TR1

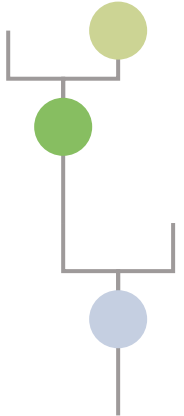

## TR2

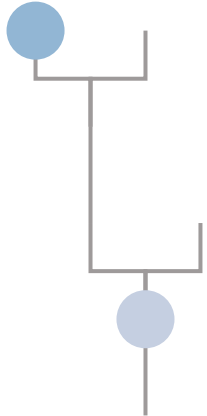

## TR3

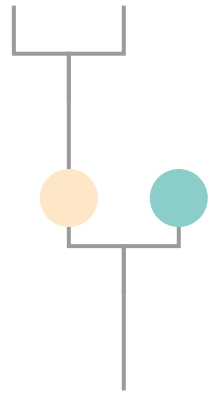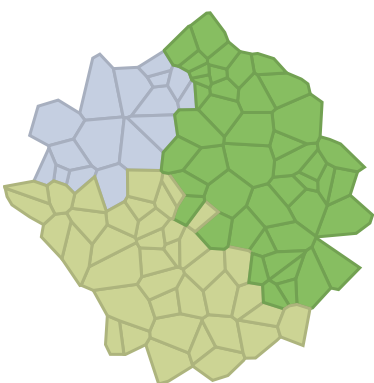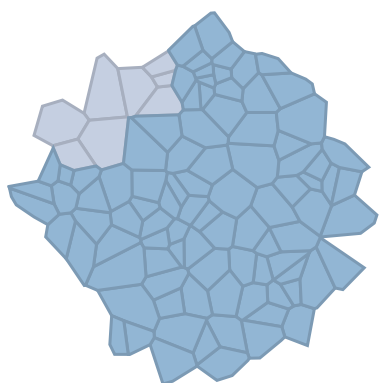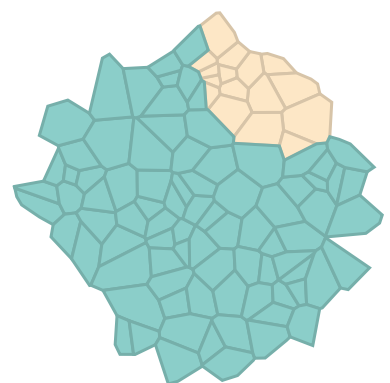

# CRC31

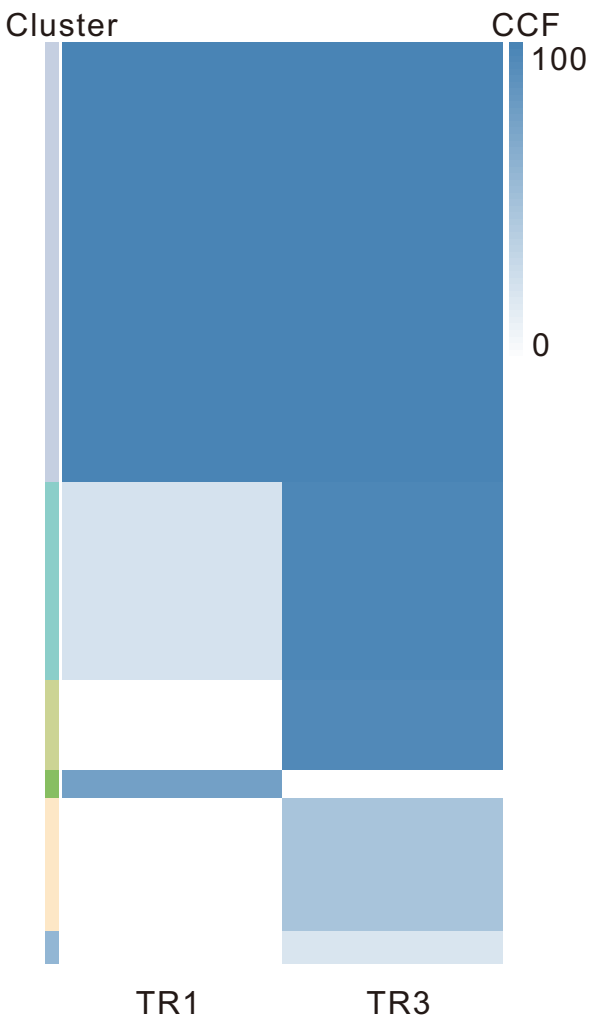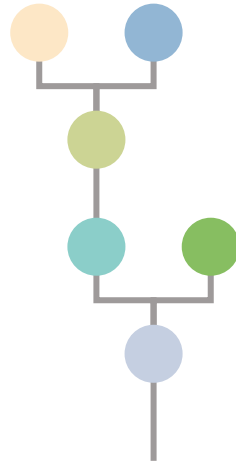

| Gene          | Cytoband | Type | Cluster |
|---------------|----------|------|---------|
| <i>APC</i>    | 5q22.2   | SNV  | 1       |
| <i>KRAS</i>   | 12p12.1  | SNV  | 1       |
| <i>TP53</i>   | 17p13.1  | SNV  | 1       |
| <i>ARID1A</i> | 1p36.11  | SNV  | 2       |
| <i>CLTCL1</i> | 22q11.21 | SNV  | 3       |

## TR1

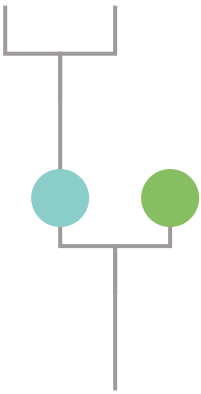

## TR3

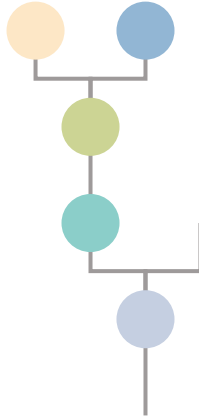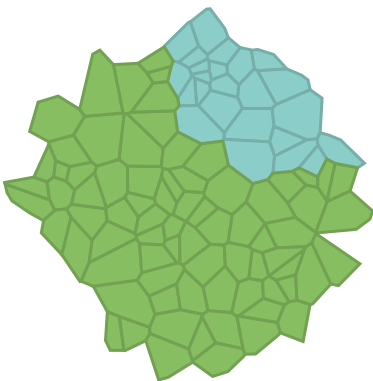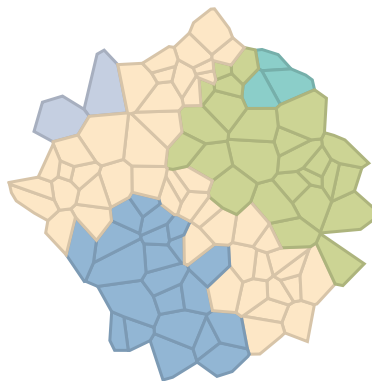

# CRC32

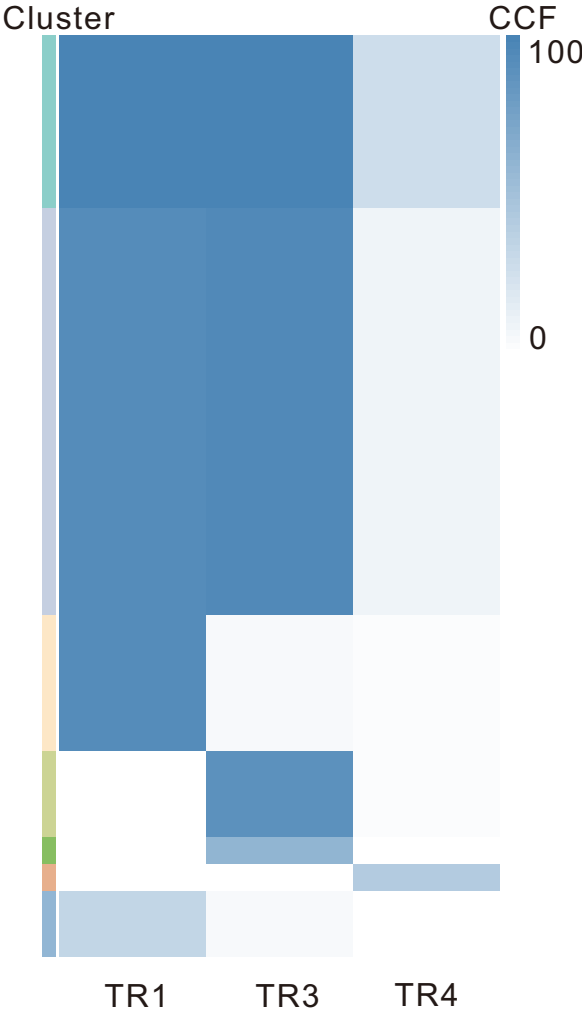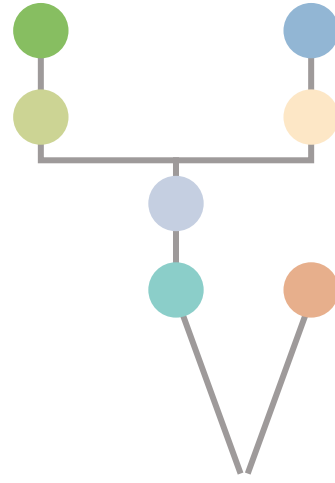

| Gene         | Cytoband | Type  | Cluster |
|--------------|----------|-------|---------|
| <i>APC</i>   | 5q22.2   | InDel | 1       |
| <i>TP53</i>  | 17p13.1  | SNV   | 2       |
| <i>ATM</i>   | 11q22.3  | InDel | 2       |
| <i>CSMD3</i> | 8q23.3   | SNV   | 3       |
| <i>IRS4</i>  | Xq22.3   | SNV   | NA      |
| <i>KMT2D</i> | 12q13.12 | InDel | NA      |

**TR1**

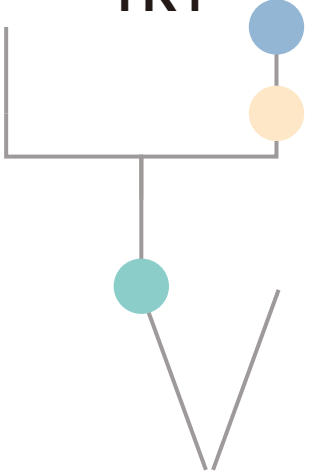

**TR3**

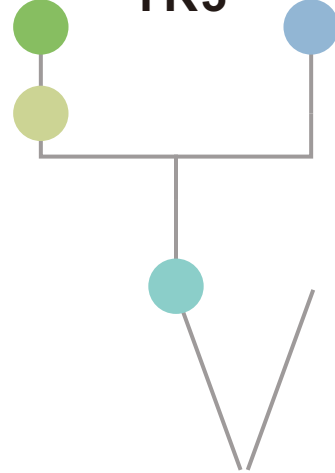

**TR4**

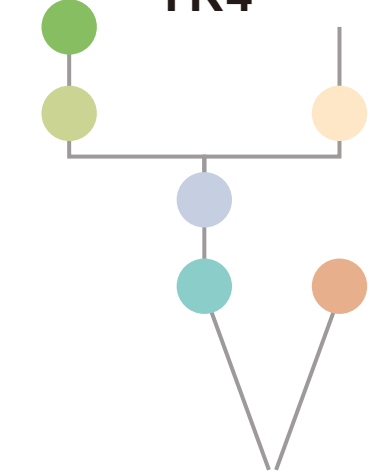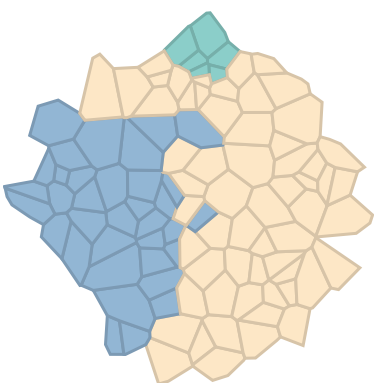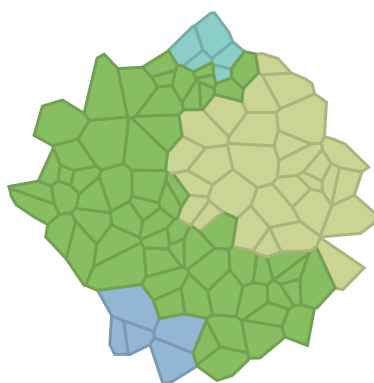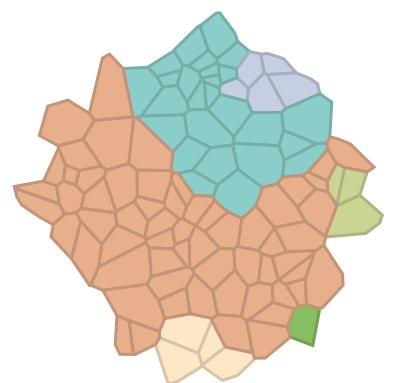

# CRC33

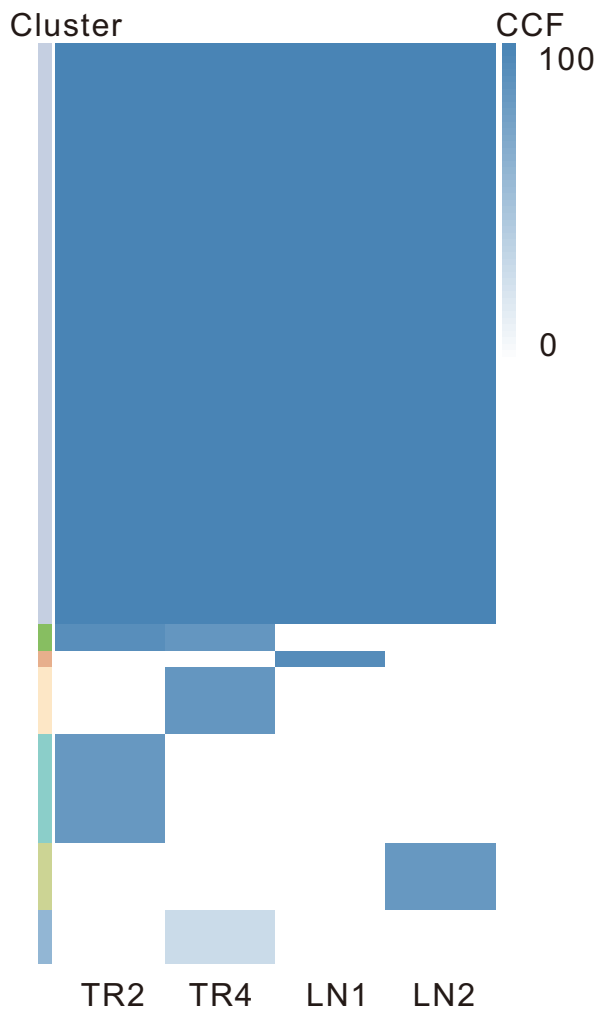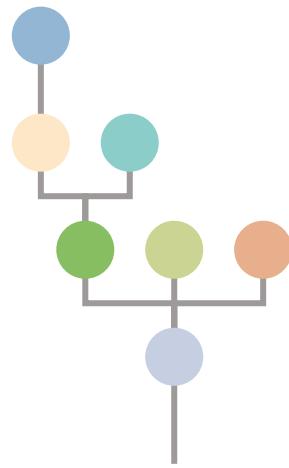

| Gene           | Cytoband | Type  | Cluster |
|----------------|----------|-------|---------|
| <i>TP53</i>    | 17p13.1  | SNV   | 1       |
| <i>JAK3</i>    | 19p13.11 | SNV   | 1       |
| <i>APC</i>     | 5q22.2   | InDel | 1       |
| <i>FLT3</i>    | 13q12.2  | Amp   | 1       |
| <i>FOXO1</i>   | 13q14.11 | Amp   | 1       |
| <i>CYSLTR2</i> | 13q14.2  | Amp   | 1       |
| <i>SRC</i>     | 20q11.23 | Amp   | 1       |
| <i>MAFB</i>    | 20q12    | Amp   | 1       |
| <i>PLCG1</i>   | 20q12    | Amp   | 1       |
| <i>NFATC2</i>  | 20q13.2  | Amp   | 1       |
| <i>SALL4</i>   | 20q13.2  | Amp   | 1       |
| <i>GNAS</i>    | 20q13.32 | Amp   | 1       |
| <i>PTK6</i>    | 20q13.33 | Amp   | 1       |
| <i>NRG1</i>    | 8p12     | SNV   | 4       |
| <i>EGFR</i>    | 7p11.2   | Amp   | 4       |
| <i>IRS4</i>    | Xq22.3   | InDel | NA      |

## TR2

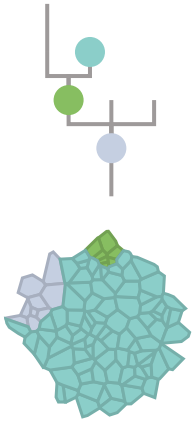

## TR4

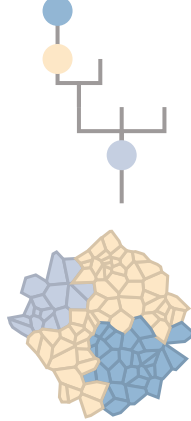

## LN1

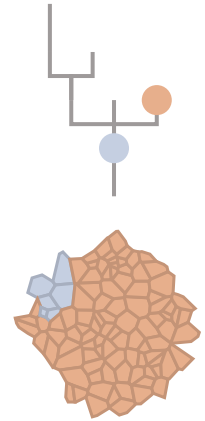

## LN2

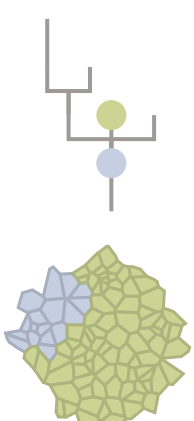

# CRC34

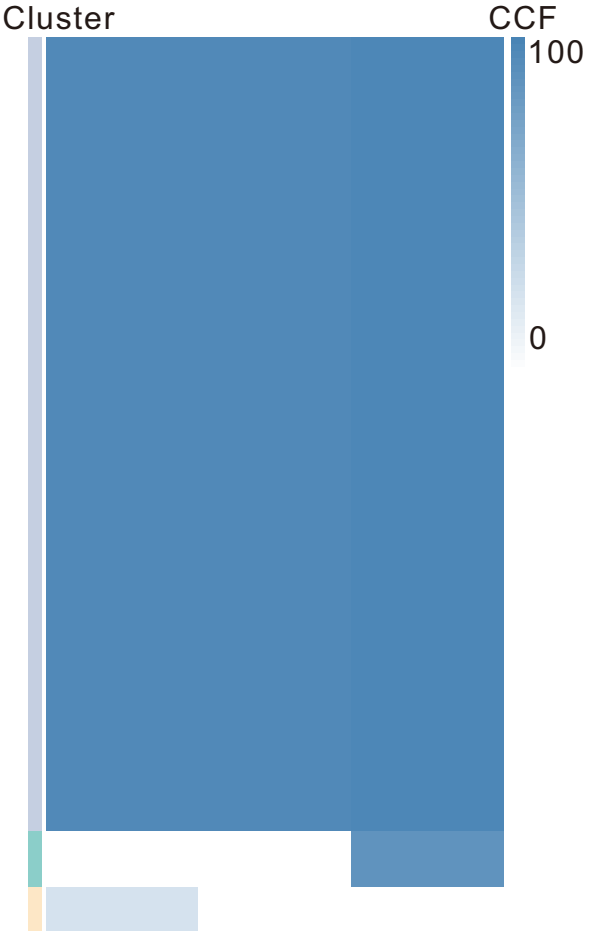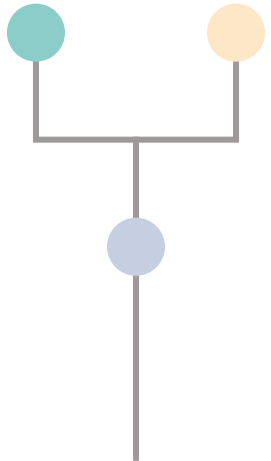

| Gene  | Cytoband | Type  | Cluster |
|-------|----------|-------|---------|
| * APC | 5q22.2   | SNV   | 1       |
| * APC | 5q22.2   | SNV   | 1       |
| KRAS  | 12p12.1  | SNV   | 1       |
| TP53  | 17p13.1  | SNV   | 1       |
| CSMD3 | 8q23.3   | InDel | 1       |
| AR    | Xq12     | SNV   | NA      |

TR1 TR4 L1\_ENTD

## TR1

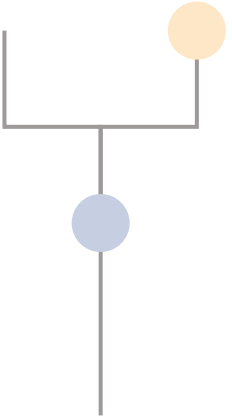

## TR4

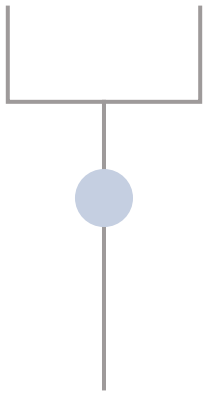

## LN1\_ENTD

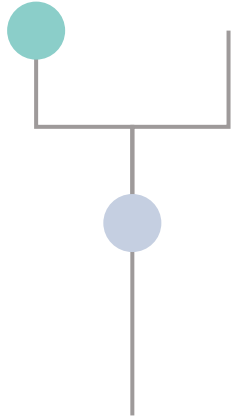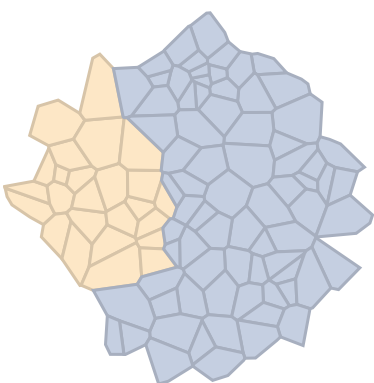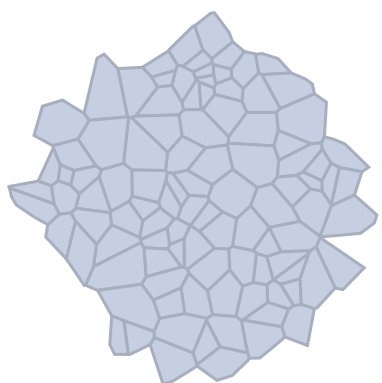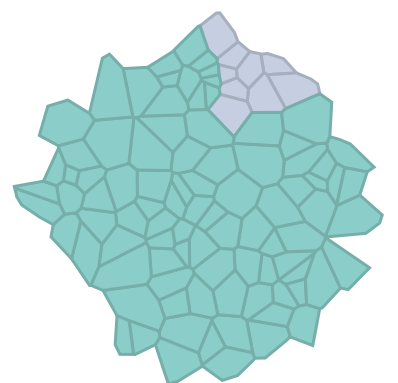

# CRC35

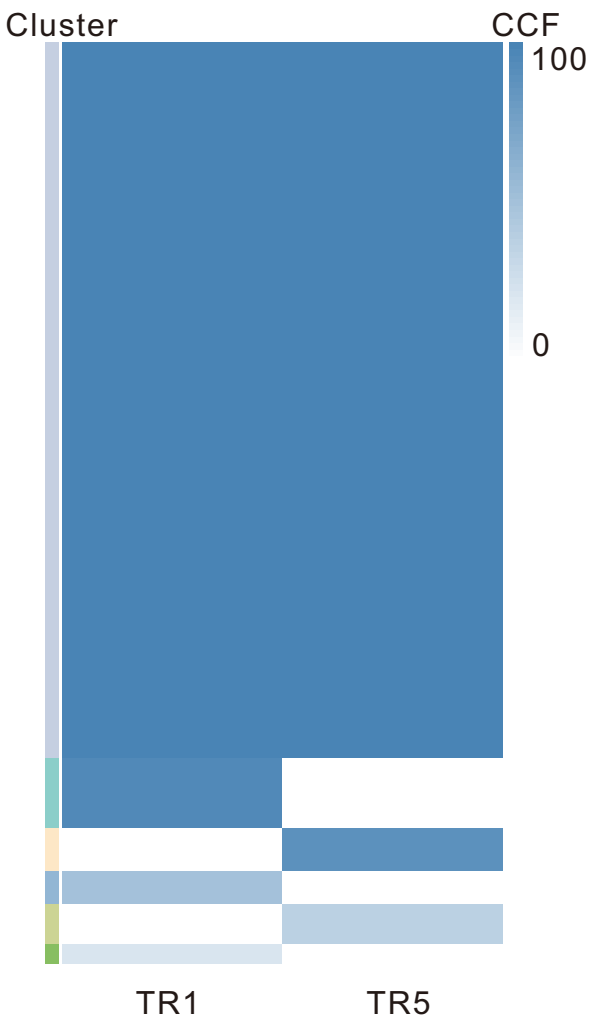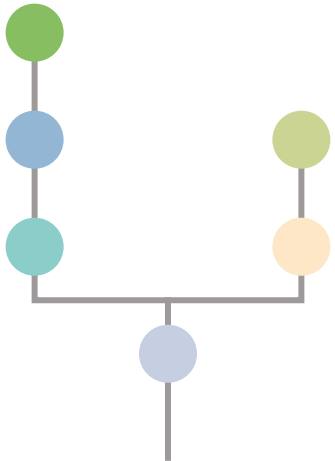

| Gene   | Cytoband | Type | Cluster |
|--------|----------|------|---------|
| APC    | 5q22.2   | SNV  | 1       |
| ATM    | 11q22.3  | SNV  | 1       |
| KRAS   | 12p12.1  | SNV  | 1       |
| POLG   | 15q26.1  | SNV  | 1       |
| TP53   | 17p13.1  | SNV  | 1       |
| IL7R   | 5p13.2   | Amp  | 1       |
| CTNND2 | 5p15.2   | Amp  | 1       |
| TERT   | 5p15.33  | Amp  | 1       |
| SSX2   | Xp11.22  | Amp  | 1       |
| ARAF   | Xp11.23  | Amp  | 1       |
| GATA1  | Xp11.23  | Amp  | 1       |
| SSX1   | Xp11.23  | Amp  | 1       |
| SSX4   | Xp11.23  | Amp  | 1       |
| TFE3   | Xp11.23  | Amp  | 1       |
| WAS    | Xp11.23  | Amp  | 1       |
| KDM6A  | Xp11.3   | Amp  | 1       |

## TR1

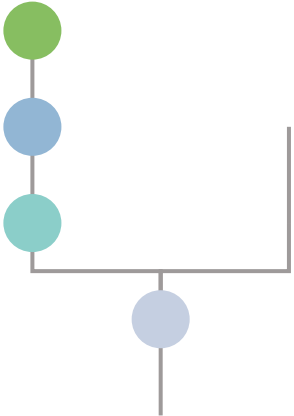

## TR5

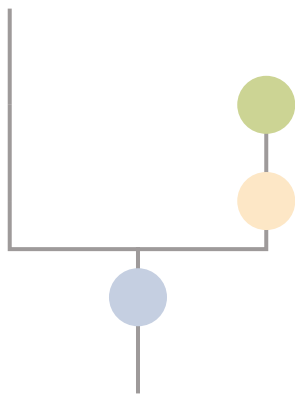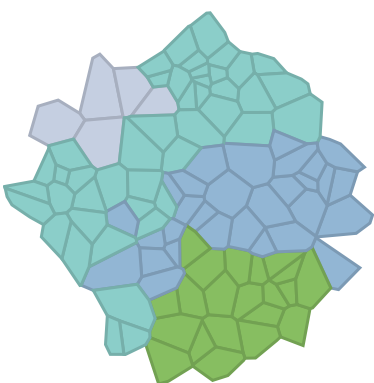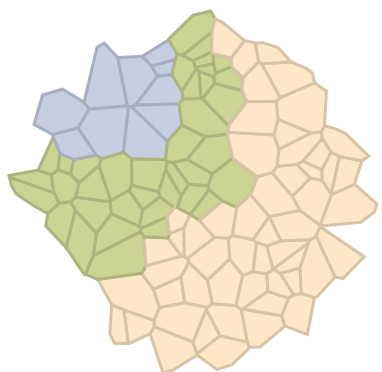

# CRC36

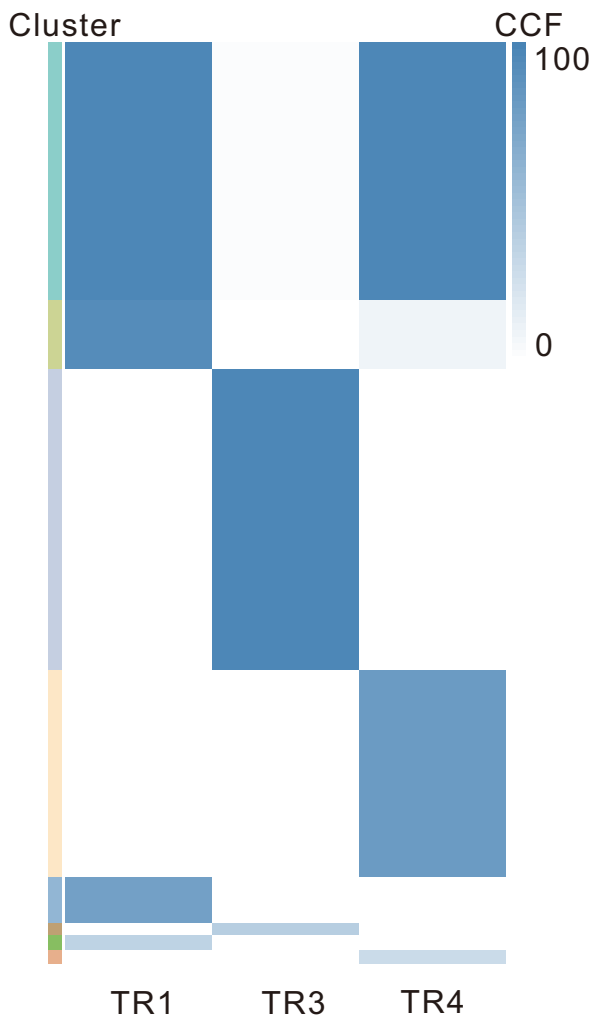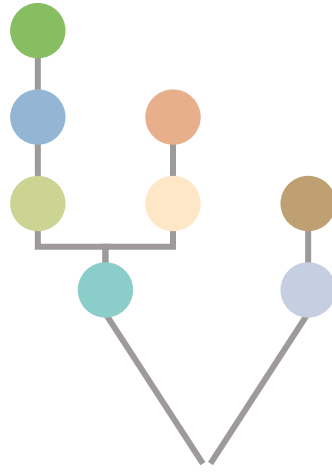

| Gene            | Cytoband | Type  | Cluster |
|-----------------|----------|-------|---------|
| <i>FBXO11</i>   | 2p16.3   | SNV   | 1       |
| <i>FBXW7</i>    | 4q31.3   | SNV   | 1       |
| * <i>APC</i>    | 5q22.2   | SNV   | 1       |
| <i>WRN</i>      | 8p12     | SNV   | 1       |
| <i>ATM</i>      | 11q22.3  | SNV   | 1       |
| <i>KRAS</i>     | 12p12.1  | SNV   | 1       |
| * <i>TP53</i>   | 17p13.1  | SNV   | 1       |
| * <i>TP53</i>   | 17p13.1  | SNV   | 1       |
| <i>PTPRT</i>    | 20q12    | SNV   | 1       |
| <i>ERBB4</i>    | 2q34     | SNV   | 2       |
| * <i>APC</i>    | 5q22.2   | SNV   | 2       |
| <i>ABI1</i>     | 10p12.1  | SNV   | 2       |
| * <i>CREBBP</i> | 16p13.3  | SNV   | 2       |
| * <i>CREBBP</i> | 16p13.3  | SNV   | 2       |
| * <i>TP53</i>   | 17p13.1  | SNV   | 2       |
| <i>LZTR1</i>    | 22q11.21 | InDel | 2       |
| <i>NFATC2</i>   | 20q13.2  | Amp   | 2       |
| <i>SALL4</i>    | 20q13.2  | Amp   | 2       |
| <i>GNAS</i>     | 20q13.32 | Amp   | 2       |
| <i>RAC1</i>     | 7p22.1   | Amp   | 3       |
| <i>CARD11</i>   | 7p22.2   | Amp   | 3       |
| <i>SRC</i>      | 20q11.23 | Amp   | 3       |
| <i>MAFB</i>     | 20q12    | Amp   | 3       |
| <i>PLCG1</i>    | 20q12    | Amp   | 3       |
| <i>KMT2C</i>    | 7q36.1   | SNV   | 4       |
| <i>PTK6</i>     | 20q13.33 | Amp   | 4       |
| <i>ZFH3</i>     | 16q22.3  | SNV   | 5       |
| <i>LRIG3</i>    | 12q14.1  | SNV   | 7       |
| <i>LARP4B</i>   | 10p15.3  | InDel | 8       |
| <i>BCOR</i>     | Xp11.4   | SNV   | NA      |

TR1

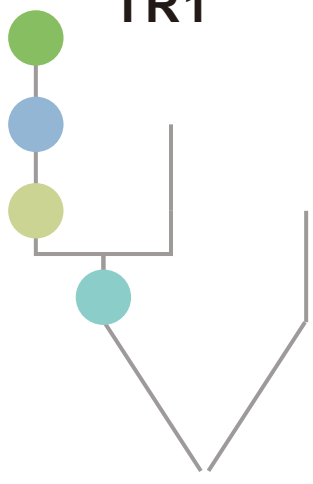

TR3

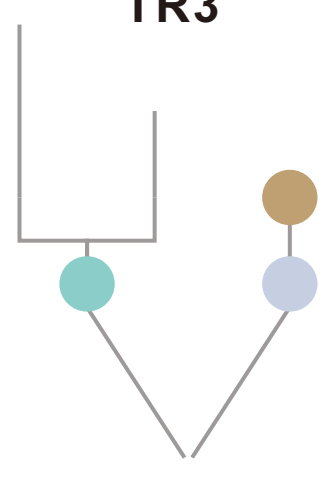

TR4

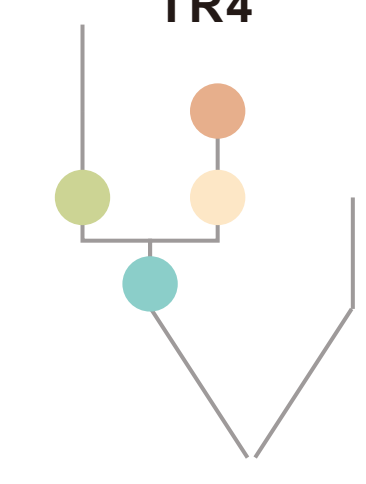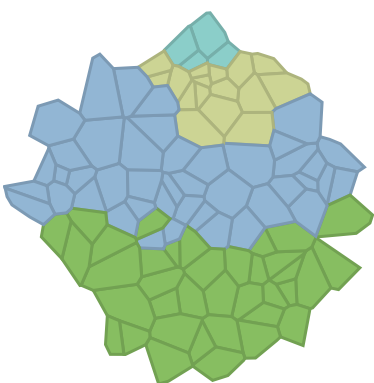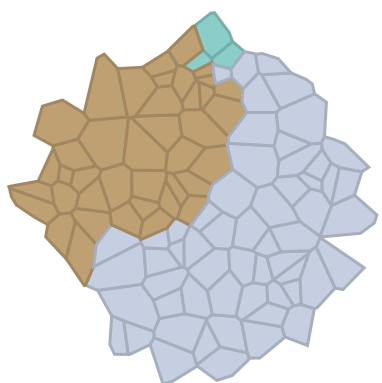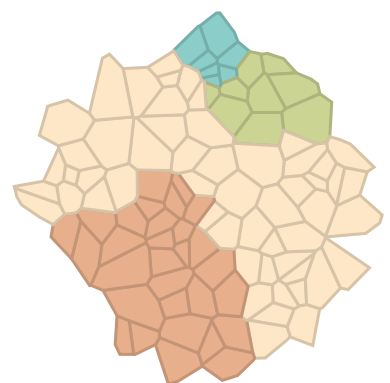

# CRC37

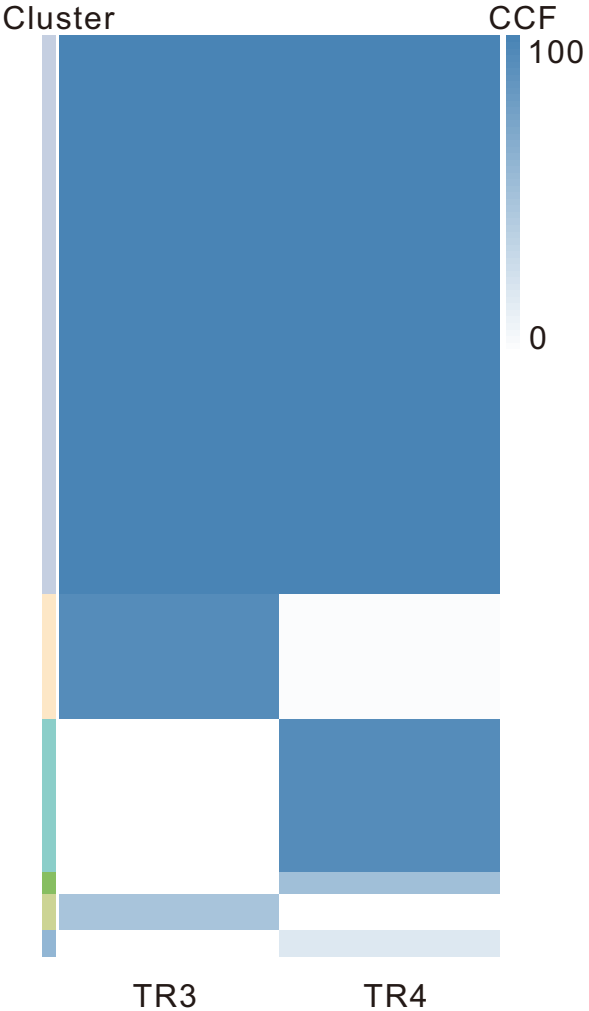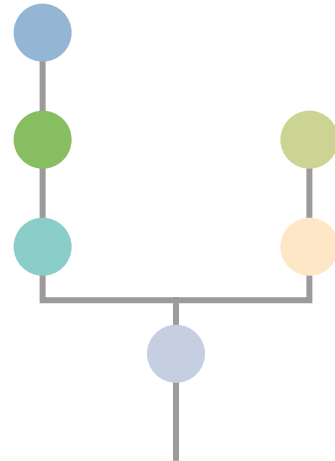

| Gene   | Cytoband | Type  | Cluster |
|--------|----------|-------|---------|
| * TP53 | 17p13.1  | SNV   | 1       |
| * TP53 | 17p13.1  | SNV   | 1       |
| * APC  | 5q22.2   | InDel | 1       |
| FLT3   | 13q12.2  | Amp   | 1       |
| SRC    | 20q11.23 | Amp   | 1       |
| MAFB   | 20q12    | Amp   | 1       |
| PLCG1  | 20q12    | Amp   | 1       |
| NFATC2 | 20q13.2  | Amp   | 1       |
| SALL4  | 20q13.2  | Amp   | 1       |
| GNAS   | 20q13.32 | Amp   | 1       |
| PTK6   | 20q13.33 | Amp   | 1       |
| * APC  | 5q22.2   | InDel | NA      |

## TR3

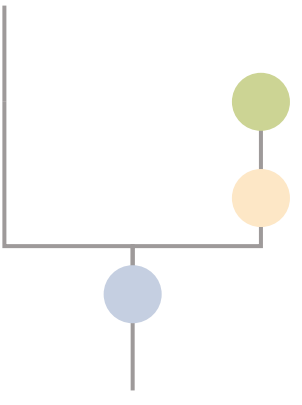

## TR4

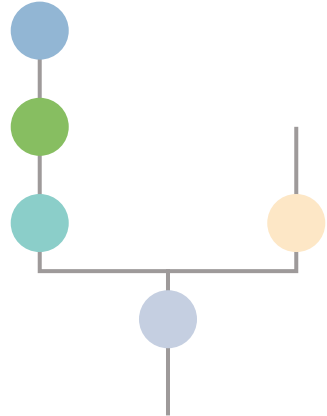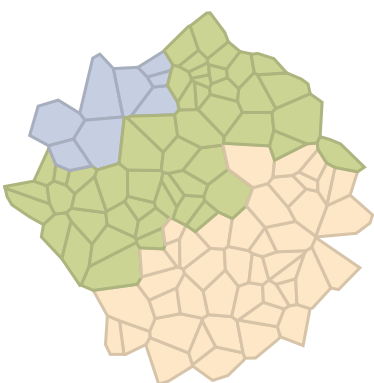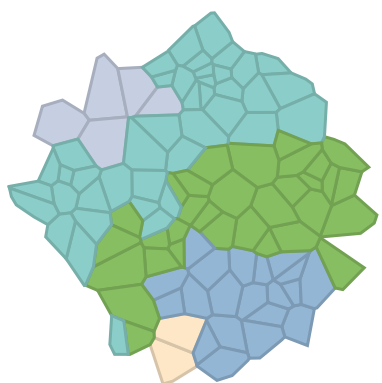



# CRC38

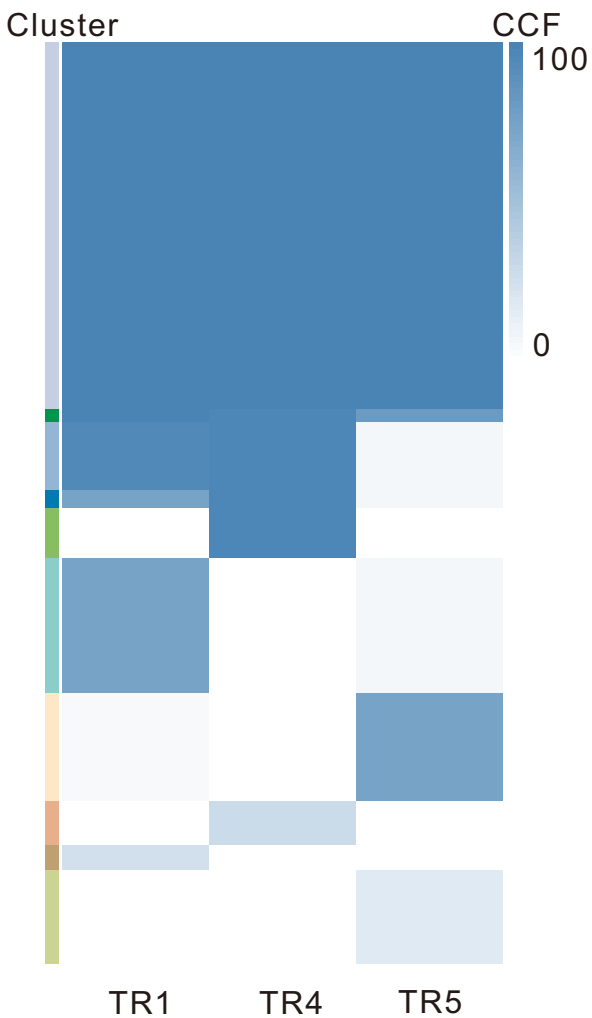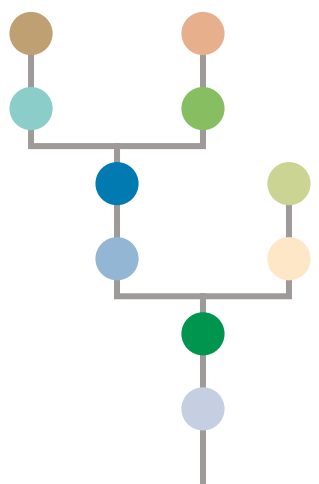

| Gene   | Cytoband | Type | Cluster |
|--------|----------|------|---------|
| ATM    | 11q22.3  | SNV  | 1       |
| ZFHX3  | 16q22.3  | SNV  | 1       |
| TP53   | 17p13.1  | SNV  | 1       |
| SMAD4  | 18q21.2  | SNV  | 1       |
| CCND3  | 6p21.1   | Amp  | 1       |
| TFEB   | 6p21.1   | Amp  | 1       |
| IKBKB  | 8p11.21  | Amp  | 1       |
| KAT6A  | 8p11.21  | Amp  | 1       |
| RAD51B | 14q24.1  | SNV  | 2       |
| NCOR1  | 17p11.2  | SNV  | 4       |
| KRAS   | 12p12.1  | SNV  | 10      |

## TR1

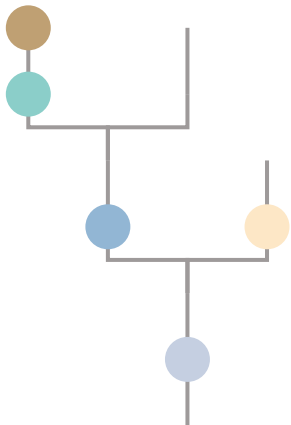

## TR4

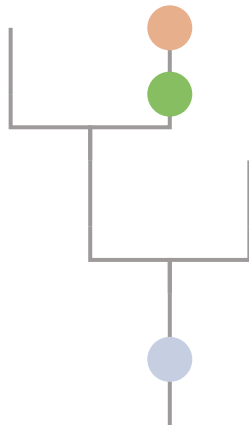

## TR5

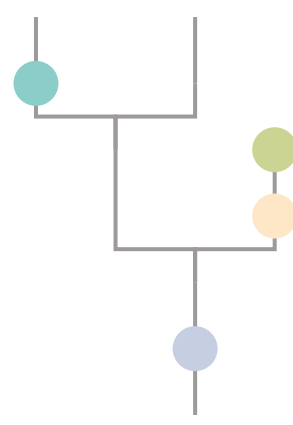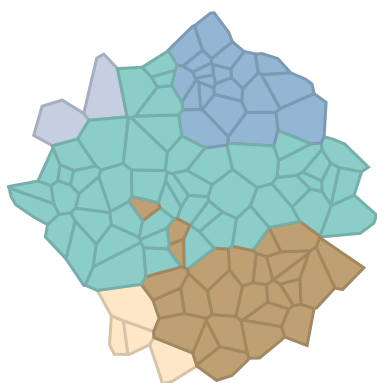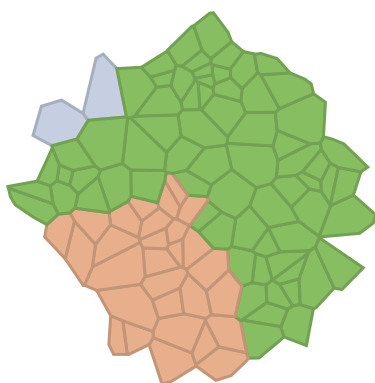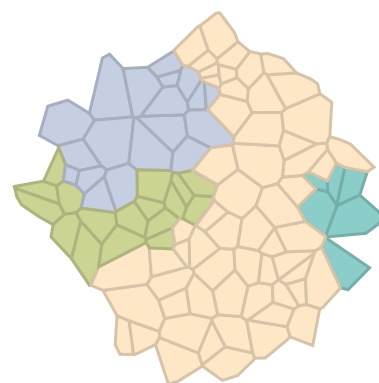

# CRC39

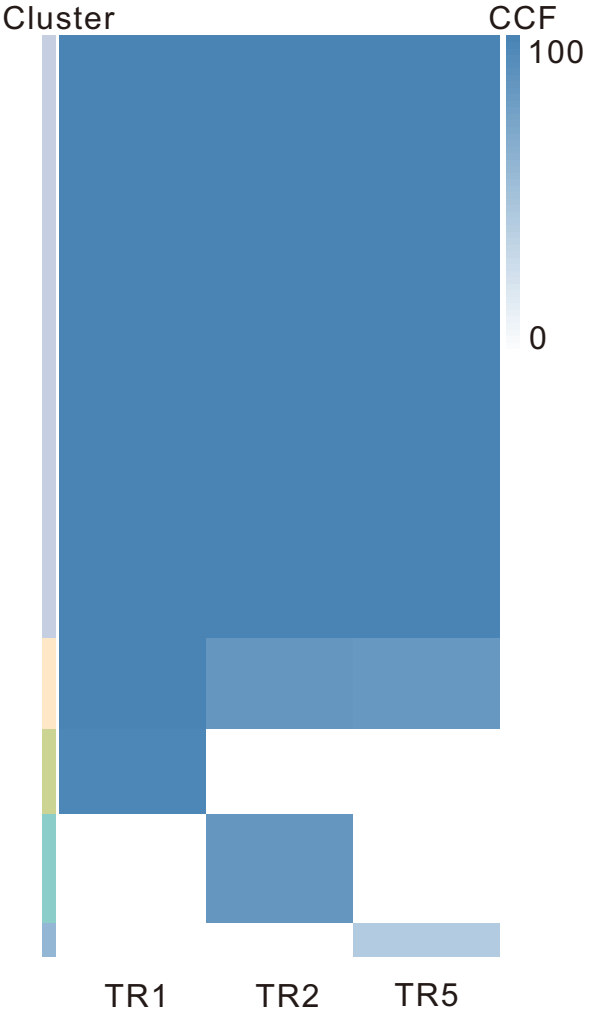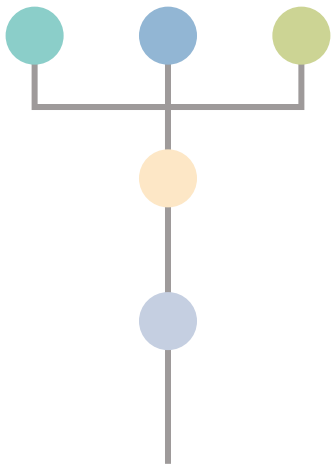

| Gene           | Cytoband | Type  | Cluster |
|----------------|----------|-------|---------|
| <i>TP53</i>    | 17p13.1  | SNV   | 1       |
| <i>MAP3K1</i>  | 5q11.2   | InDel | 1       |
| <i>ATM</i>     | 11q22.3  | InDel | 1       |
| <i>FLT3</i>    | 13q12.2  | Amp   | 1       |
| <i>FOXO1</i>   | 13q14.11 | Amp   | 1       |
| <i>CYSLTR2</i> | 13q14.2  | Amp   | 1       |
| <i>KRAS</i>    | 12p12.1  | SNV   | 3       |
| <i>FBXW7</i>   | 4q31.3   | SNV   | NA      |
| <i>IRS4</i>    | Xq22.3   | Amp   | NA      |
| <i>BCORL1</i>  | Xq26.1   | Amp   | NA      |
| <i>ELF4</i>    | Xq26.1   | Amp   | NA      |
| <i>GPC3</i>    | Xq26.2   | Amp   | NA      |

## TR1

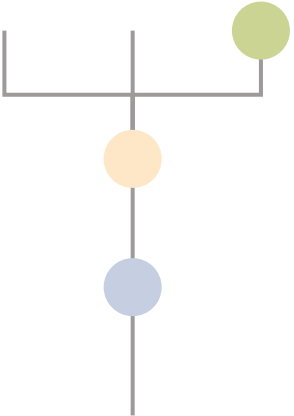

## TR2

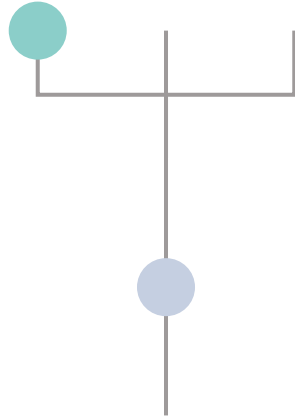

## TR5

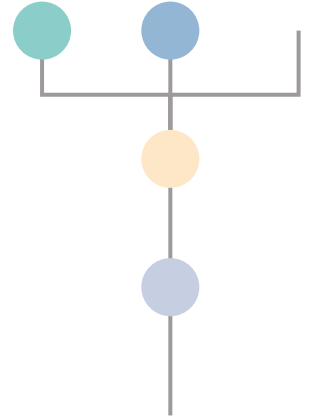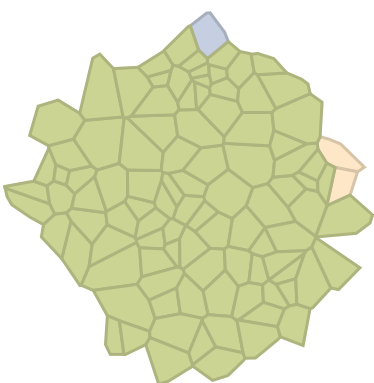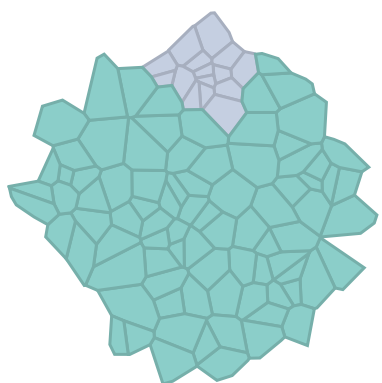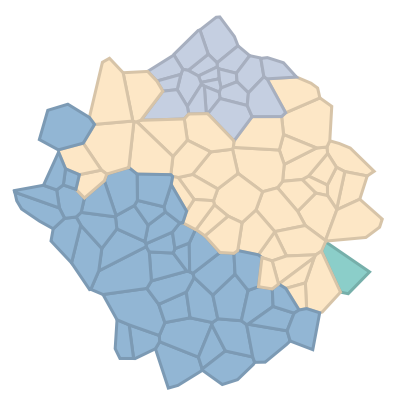

# CRC40

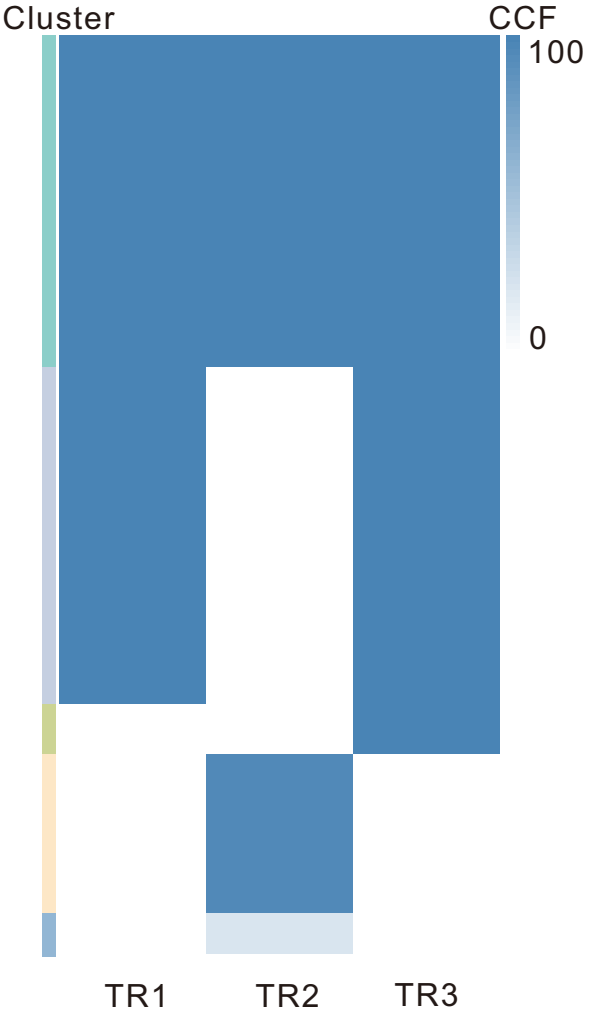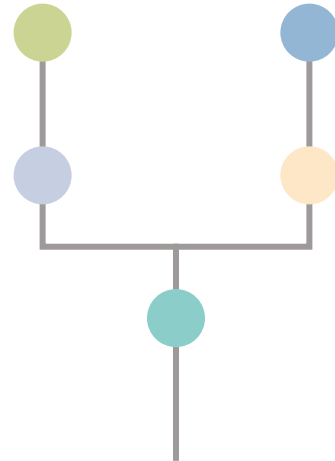

| Gene            | Cytoband | Type  | Cluster |
|-----------------|----------|-------|---------|
| <i>PIK3CA</i>   | 3q26.32  | SNV   | 1       |
| <i>TCF7L2</i>   | 10q25.3  | SNV   | 1       |
| <i>LZTR1</i>    | 22q11.21 | InDel | 1       |
| <i>*APC</i>     | 5q22.2   | SNV   | 2       |
| <i>*APC</i>     | 5q22.2   | SNV   | 2       |
| <i>KRAS</i>     | 12p12.1  | SNV   | 2       |
| <i>ARID1A</i>   | 1p36.11  | InDel | 2       |
| <i>ELF3</i>     | 1q32.1   | InDel | 2       |
| <i>KMT2C</i>    | 7q36.1   | SNV   | 3       |
| <i>NDRG1</i>    | 8q24.22  | SNV   | 3       |
| <i>GNAS</i>     | 20q13.32 | SNV   | 3       |
| <i>MED12</i>    | Xq13.1   | SNV   | NA      |
| <i>RECQL4</i>   | 8q24.3   | Amp   | NA      |
| <i>RUNX1</i>    | 21q22.12 | Del   | NA      |
| <i>SMARCB1</i>  | 22q11.23 | Del   | NA      |
| <i>CHEK2</i>    | 22q12.1  | Del   | NA      |
| <i>ZNRF3</i>    | 22q12.1  | Del   | NA      |
| <i>NF2</i>      | 22q12.2  | Del   | NA      |
| <i>MYH9</i>     | 22q12.3  | Del   | NA      |
| <i>APOBEC3B</i> | 22q13.1  | Del   | NA      |
| <i>EP300</i>    | 22q13.2  | Del   | NA      |
| <i>MKL1</i>     | 22q13.2  | Del   | NA      |

## TR1

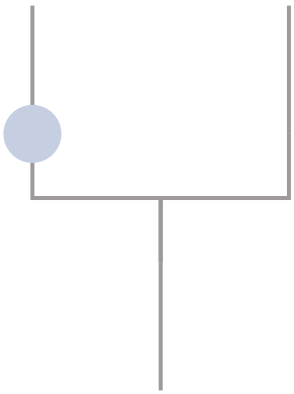

## TR2

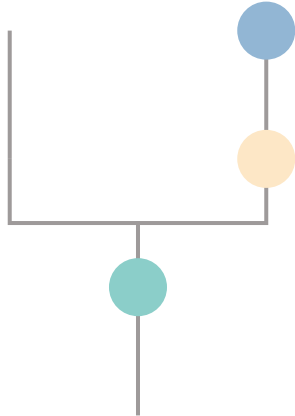

## TR3

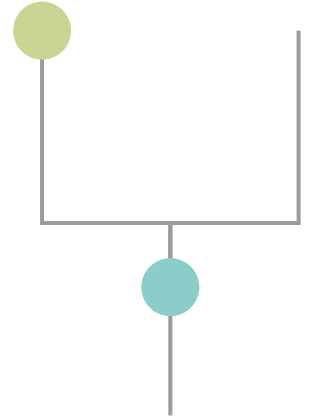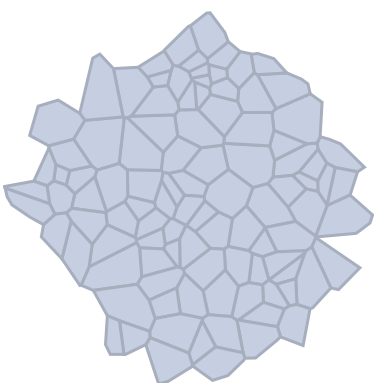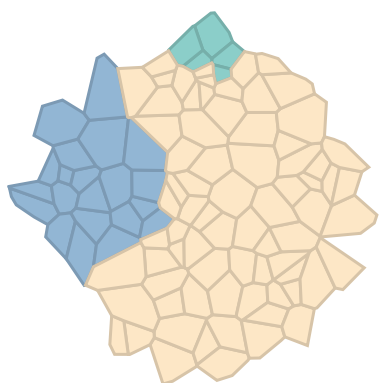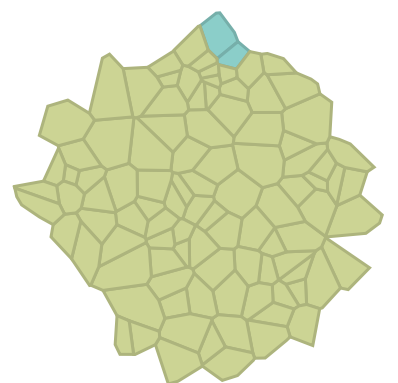

# CRC41

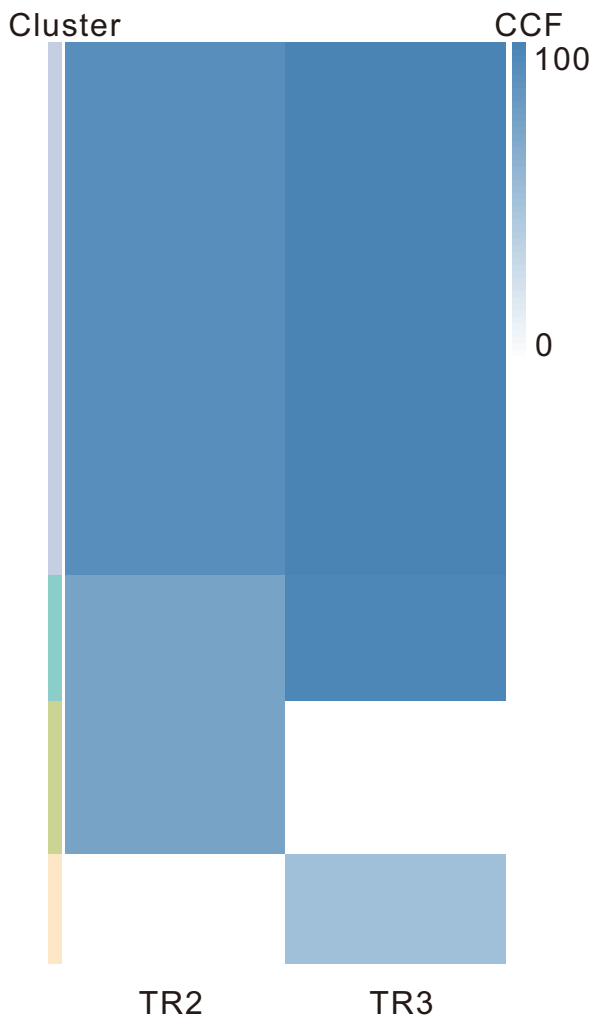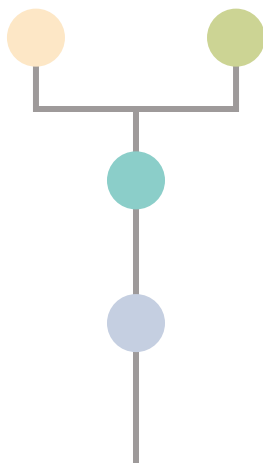

| Gene     | Cytoband | Type  | Cluster |
|----------|----------|-------|---------|
| TCF7L2   | 10q25.3  | SNV   | 1       |
| TP53     | 17p13.1  | SNV   | 1       |
| FBXW7    | 4q31.3   | InDel | 1       |
| LZTR1    | 22q11.21 | InDel | 1       |
| IKBKB    | 8p11.21  | Amp   | 1       |
| KAT6A    | 8p11.21  | Amp   | 1       |
| FGFR1    | 8p11.23  | Amp   | 1       |
| ARID1A   | 1p36.11  | SNV   | 2       |
| SRC      | 20q11.23 | Amp   | 3       |
| MAFB     | 20q12    | Amp   | 3       |
| PLCG1    | 20q12    | Amp   | 3       |
| NFATC2   | 20q13.2  | Amp   | 3       |
| SALL4    | 20q13.2  | Amp   | 3       |
| GNAS     | 20q13.32 | Amp   | 3       |
| PTK6     | 20q13.33 | Amp   | 3       |
| RUNX1    | 21q22.12 | Del   | 4       |
| SMARCB1  | 22q11.23 | Del   | 4       |
| CHEK2    | 22q12.1  | Del   | 4       |
| ZNRF3    | 22q12.1  | Del   | 4       |
| NF2      | 22q12.2  | Del   | 4       |
| MYH9     | 22q12.3  | Del   | 4       |
| APOBEC3B | 22q13.1  | Del   | 4       |
| EP300    | 22q13.2  | Del   | 4       |
| MKL1     | 22q13.2  | Del   | 4       |
| KDM5C    | Xp11.22  | Del   | 4       |
| SMC1A    | Xp11.22  | Del   | 4       |
| GATA1    | Xp11.23  | Del   | 4       |
| RBM10    | Xp11.23  | Del   | 4       |
| KDM6A    | Xp11.3   | Del   | 4       |
| BCOR     | Xp11.4   | Del   | 4       |
| DDX3X    | Xp11.4   | Del   | 4       |
| ZRSR2    | Xp22.2   | Del   | 4       |
| FOXO4    | Xq13.1   | Del   | 4       |
| MED12    | Xq13.1   | Del   | 4       |
| ZMYM3    | Xq13.1   | Del   | 4       |
| ATRX     | Xq21.1   | Del   | 4       |
| BTK      | Xq22.1   | Del   | 4       |
| IRS4     | Xq22.3   | Del   | 4       |
| STAG2    | Xq25     | Del   | 4       |
| BCORL1   | Xq26.1   | Del   | 4       |
| ELF4     | Xq26.1   | Del   | 4       |
| GPC3     | Xq26.2   | Del   | 4       |
| PHF6     | Xq26.2   | Del   | 4       |
| ATP2B3   | Xq28     | Del   | 4       |
| RPL10    | Xq28     | Del   | 4       |
| AR       | Xq12     | SNV   | NA      |
| FBXW7    | 4q31.3   | InDel | NA      |

## TR2

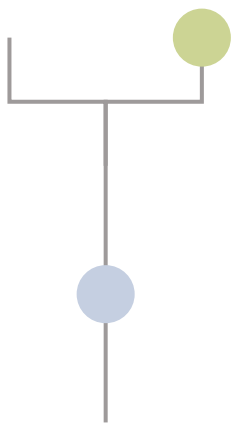

## TR3

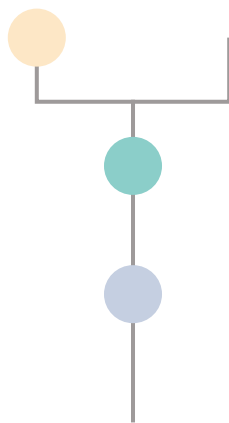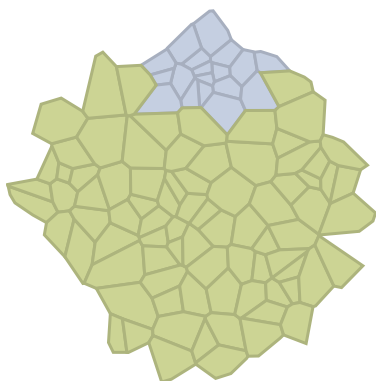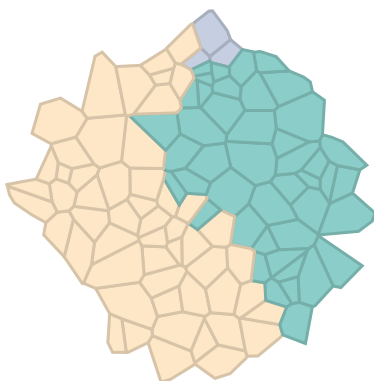

# CRC42

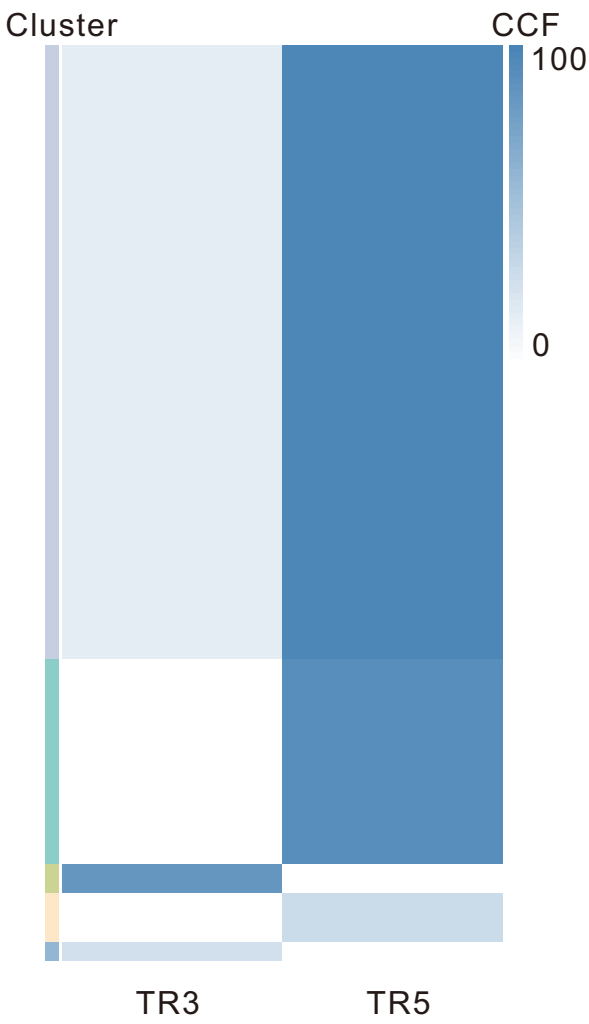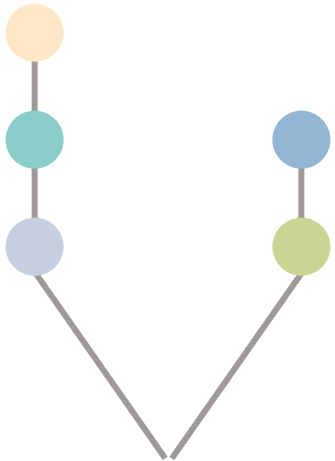

| Gene          | Cytoband | Type  | Cluster |
|---------------|----------|-------|---------|
| <i>TP53</i>   | 17p13.1  | SNV   | 1       |
| <i>DNM2</i>   | 19p13.2  | SNV   | 1       |
| <i>PTPRT</i>  | 20q12    | SNV   | 1       |
| <i>PABPC1</i> | 8q22.3   | InDel | 1       |
| <i>FAT1</i>   | 4q35.2   | Del   | 1       |
| <i>EXT2</i>   | 11p11.2  | SNV   | 3       |

## TR3

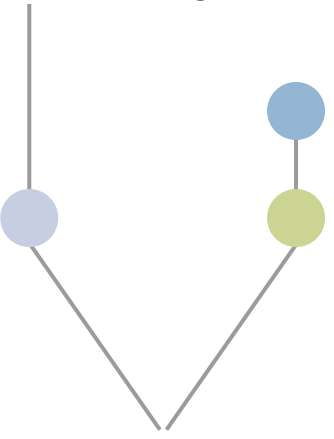

## TR5

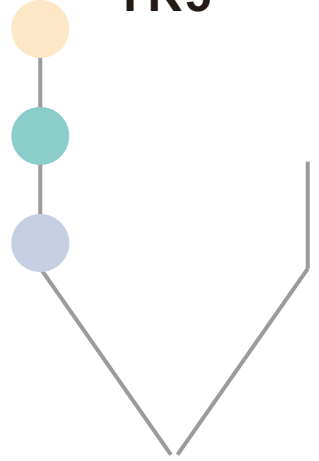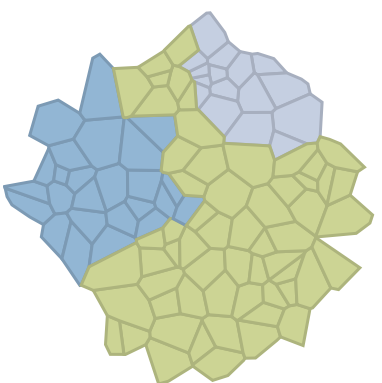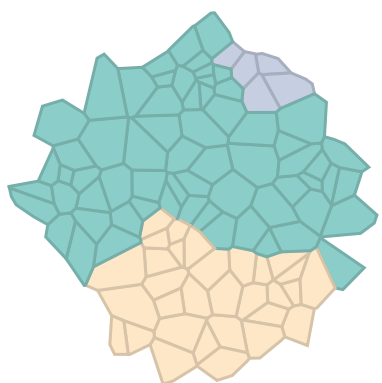

# CRC43

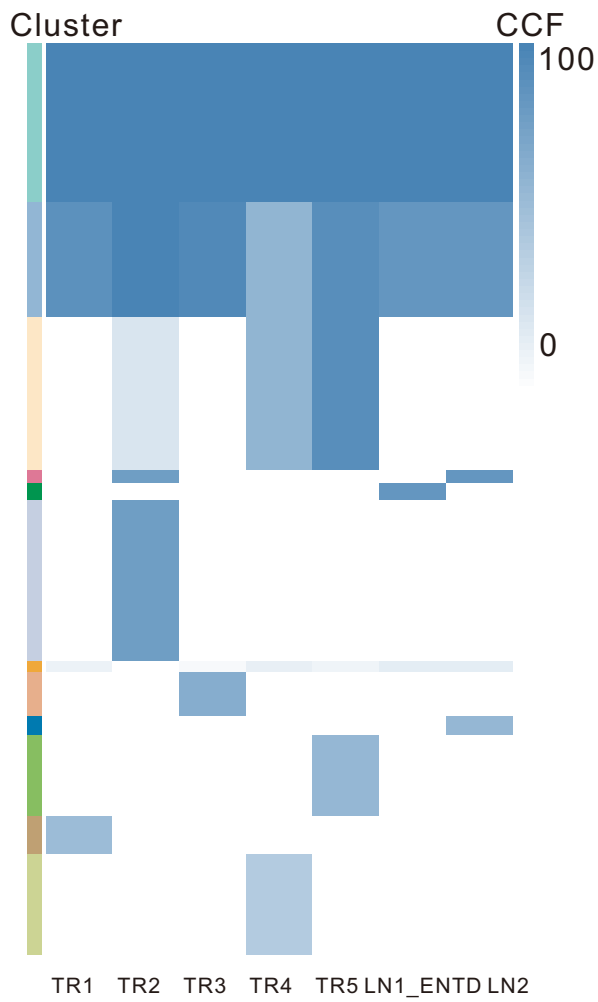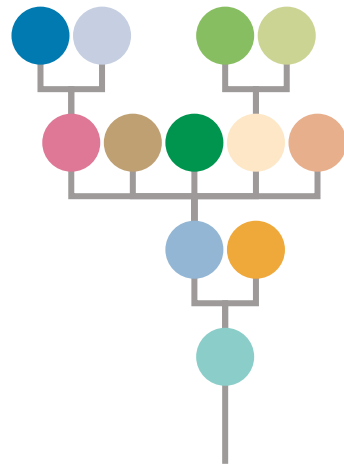

| Gene           | Cytoband | Type | Cluster |
|----------------|----------|------|---------|
| <i>LRP1B</i>   | 2q22.1   | SNV  | 1       |
| <i>IRF4</i>    | 6p25.3   | SNV  | 1       |
| <i>FBXW7</i>   | 4q31.3   | SNV  | 2       |
| <i>APC</i>     | 5q22.2   | SNV  | 2       |
| <i>BRAF</i>    | 7q34     | SNV  | 2       |
| <i>CNTNAP2</i> | 7q35     | SNV  | 2       |
| <i>BCL9L</i>   | 11q23.3  | SNV  | 2       |
| <i>KRAS</i>    | 12p12.1  | SNV  | 2       |
| <i>ZNF521</i>  | 18q11.2  | SNV  | 2       |
| <i>ELF3</i>    | 1q32.1   | SNV  | 5       |
| <i>TP53</i>    | 17p13.1  | SNV  | 5       |
| <i>SMAD4</i>   | 18q21.2  | SNV  | 5       |
| <i>WNK2</i>    | 9q22.31  | SNV  | 7       |
| <i>FOXP1</i>   | 3p13     | Amp  | 8       |
| <i>MITF</i>    | 3p13     | Amp  | 8       |

**TR1**

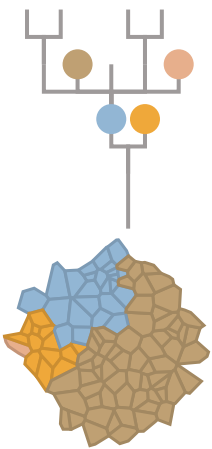

**TR2**

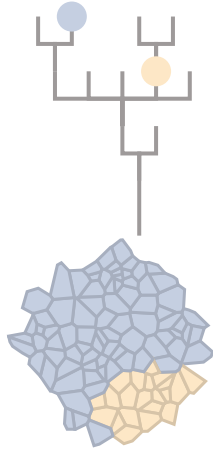

**TR3**

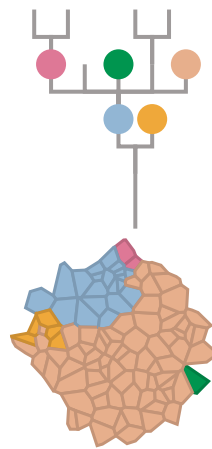

**TR4**

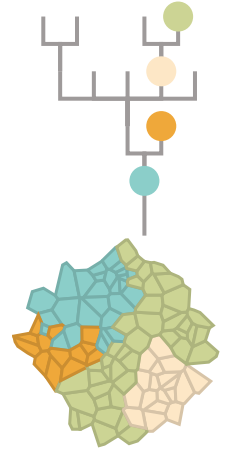

**TR5**

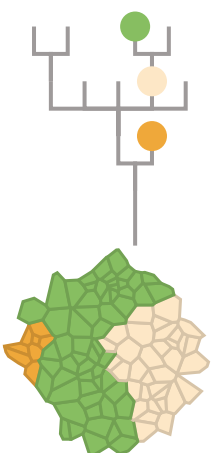

**LN1\_ENTD**

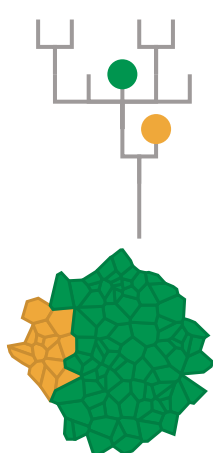

**LN2**

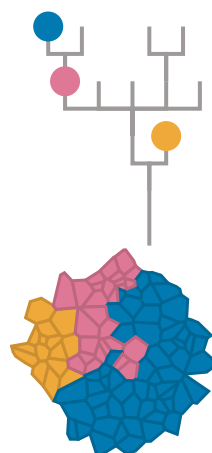

# CRC44

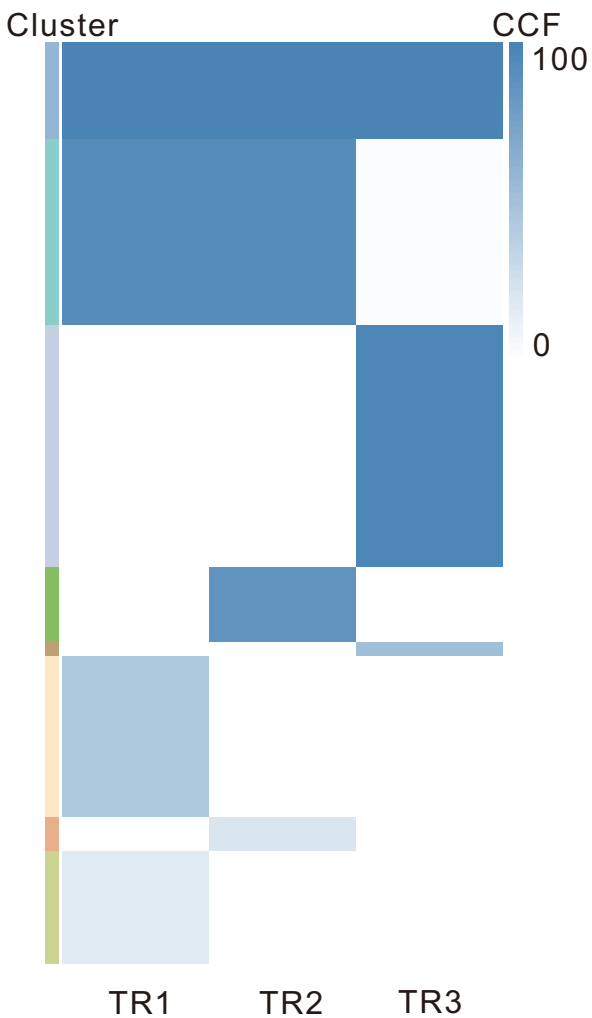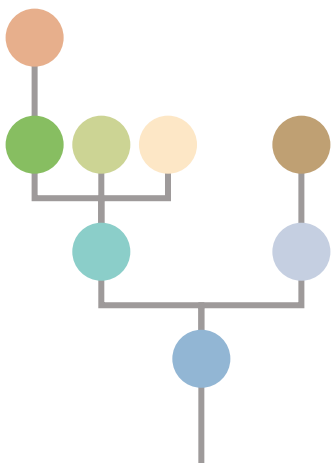

| Gene    | Cytoband | Type  | Cluster |
|---------|----------|-------|---------|
| *FBXW7  | 4q31.3   | SNV   | 1       |
| TP53    | 17p13.1  | SNV   | 1       |
| FLT3    | 13q12.2  | Amp   | 1       |
| FOXO1   | 13q14.11 | Amp   | 1       |
| CYSLTR2 | 13q14.2  | Amp   | 1       |
| ARID1A  | 1p36.11  | SNV   | 2       |
| *FBXW7  | 4q31.3   | SNV   | 2       |
| KRAS    | 12p12.1  | SNV   | 2       |
| GNAS    | 20q13.32 | SNV   | 4       |
| MUTYH   | 1p34.1   | SNV   | 5       |
| APC     | 5q22.2   | SNV   | 5       |
| ACVR2A  | 2q22.3   | SNV   | 7       |
| LZTR1   | 22q11.21 | InDel | NA      |
| AMER1   | Xq11.2   | SNV   | NA      |

## TR1

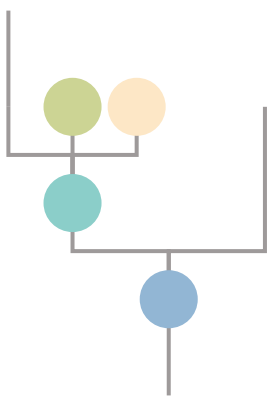

## TR2

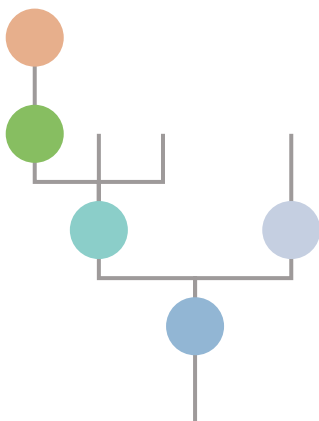

## TR3

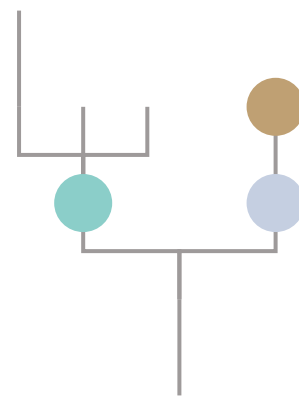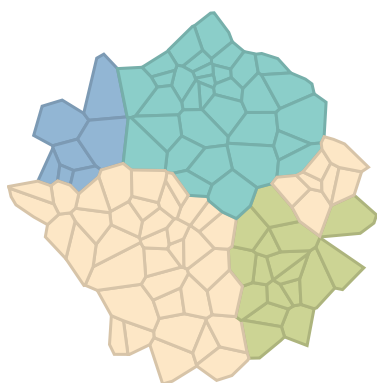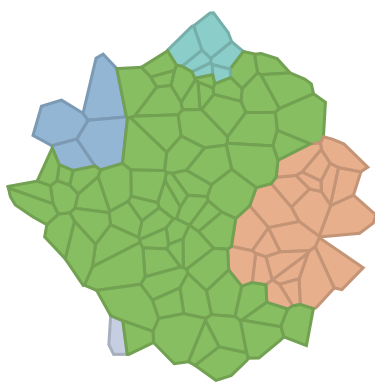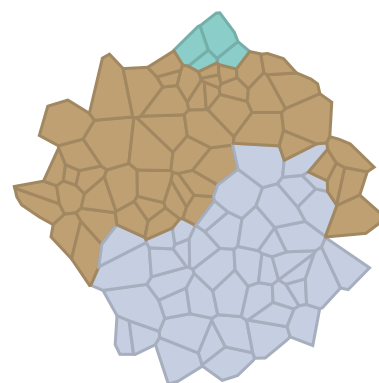

# CRC45

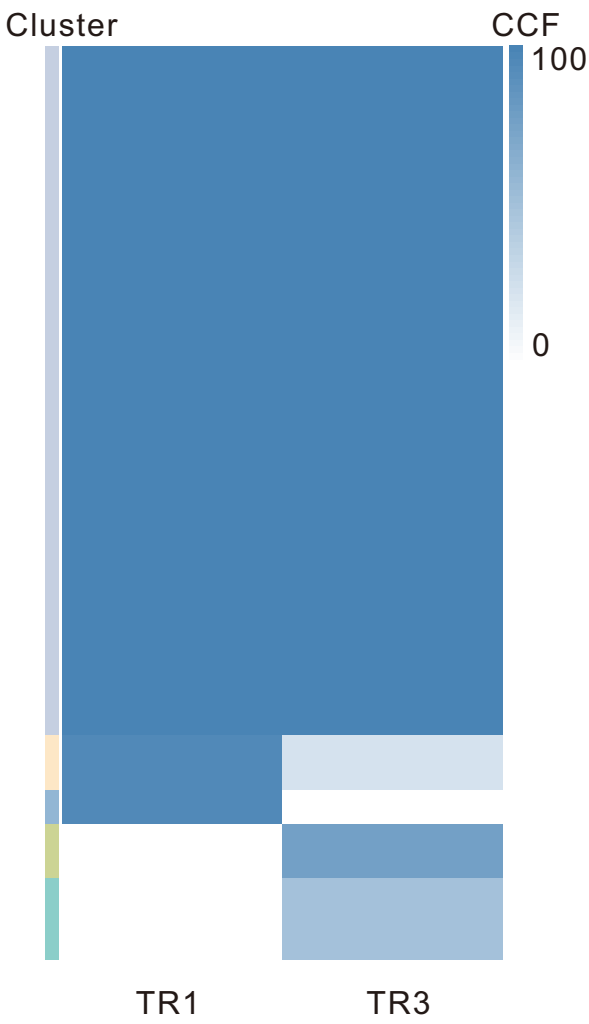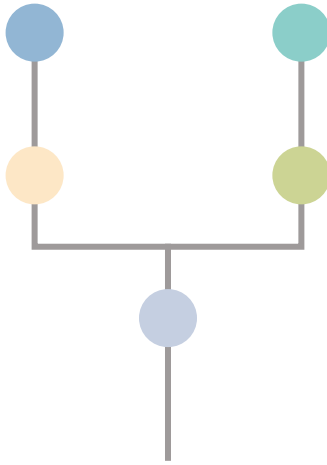

| Gene         | Cytoband | Type | Cluster |
|--------------|----------|------|---------|
| <i>APC</i>   | 5q22.2   | SNV  | 1       |
| <i>POT1</i>  | 7q31.33  | SNV  | 1       |
| <i>TP53</i>  | 17p13.1  | SNV  | 1       |
| <i>FGFR1</i> | 8p11.23  | Amp  | 4       |

## TR1

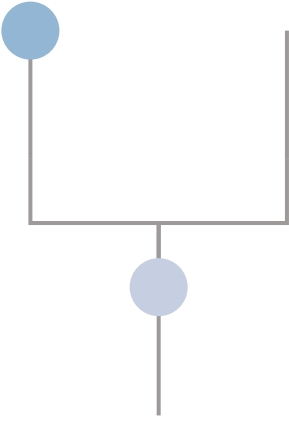

## TR3

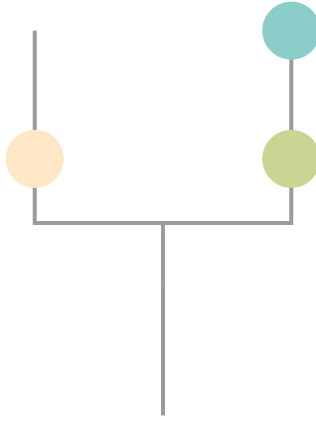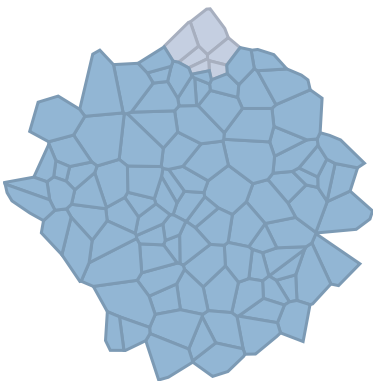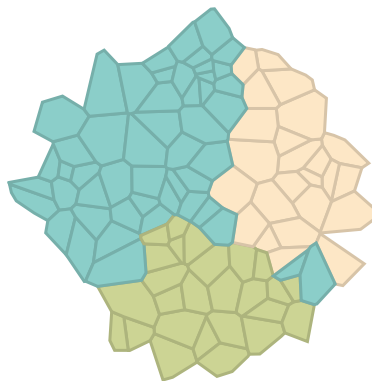



# CRC46

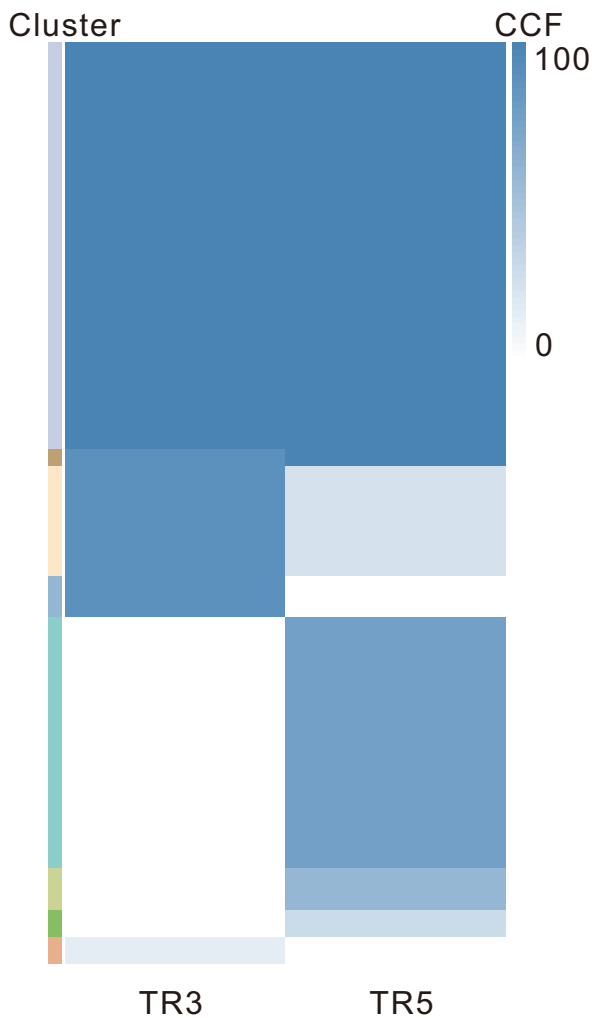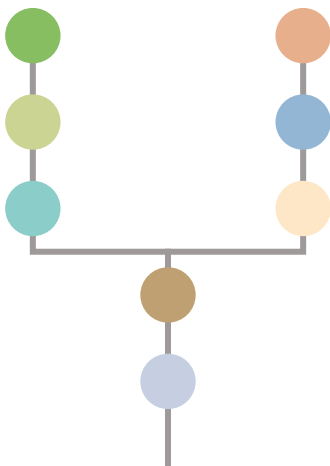

| Gene      | Cytoband | Type  | Cluster |
|-----------|----------|-------|---------|
| APC       | 5q22.2   | SNV   | 1       |
| * ATM     | 11q22.3  | SNV   | 1       |
| TBX3      | 12q24.21 | SNV   | 1       |
| ARID1A    | 1p36.11  | InDel | 1       |
| NFE2L2    | 2q31.2   | InDel | 1       |
| DDB2      | 11p11.2  | InDel | 1       |
| * ATM     | 11q22.3  | InDel | 1       |
| PLAG1     | 8q12.1   | Amp   | 1       |
| PREX2     | 8q13.2   | Amp   | 1       |
| NCOA2     | 8q13.3   | Amp   | 1       |
| HEY1      | 8q21.13  | Amp   | 1       |
| RUNX1T1   | 8q21.3   | Amp   | 1       |
| CDH17     | 8q22.1   | Amp   | 1       |
| PABPC1    | 8q22.3   | Amp   | 1       |
| UBR5      | 8q22.3   | Amp   | 1       |
| RAD21     | 8q24.11  | Amp   | 1       |
| MYC       | 8q24.21  | Amp   | 1       |
| RECQL4    | 8q24.3   | Amp   | 1       |
| FLT3      | 13q12.2  | Amp   | 1       |
| IRS4      | Xq22.3   | Amp   | 1       |
| BCORL1    | Xq26.1   | Amp   | 1       |
| ELF4      | Xq26.1   | Amp   | 1       |
| GPC3      | Xq26.2   | Amp   | 1       |
| EGFR      | 7p11.2   | Amp   | 2       |
| HNRNPA2B1 | 7p15.2   | Amp   | 2       |
| HOXA11    | 7p15.2   | Amp   | 2       |
| HOXA13    | 7p15.2   | Amp   | 2       |
| HOXA9     | 7p15.2   | Amp   | 2       |
| MACC1     | 7p21.1   | Amp   | 2       |
| ETV1      | 7p21.2   | Amp   | 2       |
| RAC1      | 7p22.1   | Amp   | 2       |
| CARD11    | 7p22.2   | Amp   | 2       |
| SSX2      | Xp11.22  | Amp   | 2       |
| ARAF      | Xp11.23  | Amp   | 2       |
| GATA1     | Xp11.23  | Amp   | 2       |
| SSX1      | Xp11.23  | Amp   | 2       |
| SSX4      | Xp11.23  | Amp   | 2       |
| TFE3      | Xp11.23  | Amp   | 2       |
| WAS       | Xp11.23  | Amp   | 2       |
| KDM6A     | Xp11.3   | Amp   | 2       |
| LRP1B     | 2q22.1   | SNV   | 3       |
| FOXO1     | 13q14.11 | Amp   | 3       |
| NTRK3     | 15q25.3  | SNV   | 8       |
| CYSLTR2   | 13q14.2  | Amp   | NA      |

## TR3

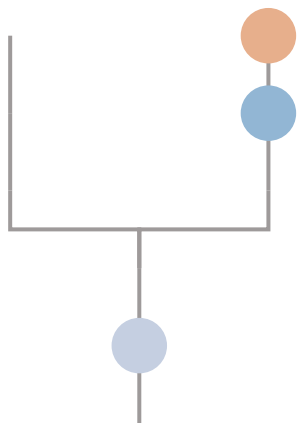

## TR5

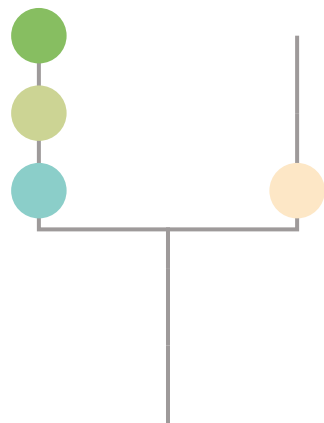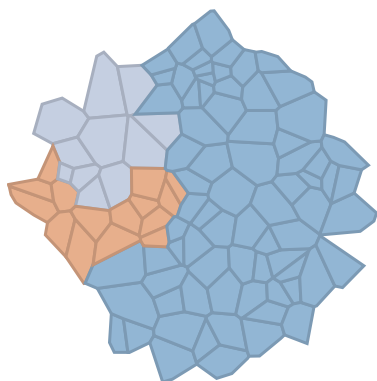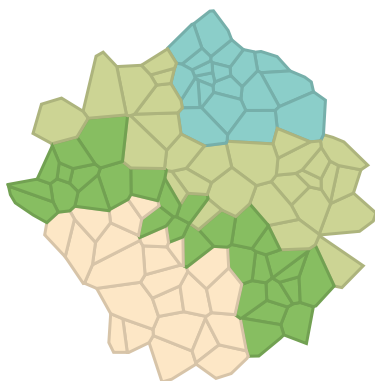

# CRC47

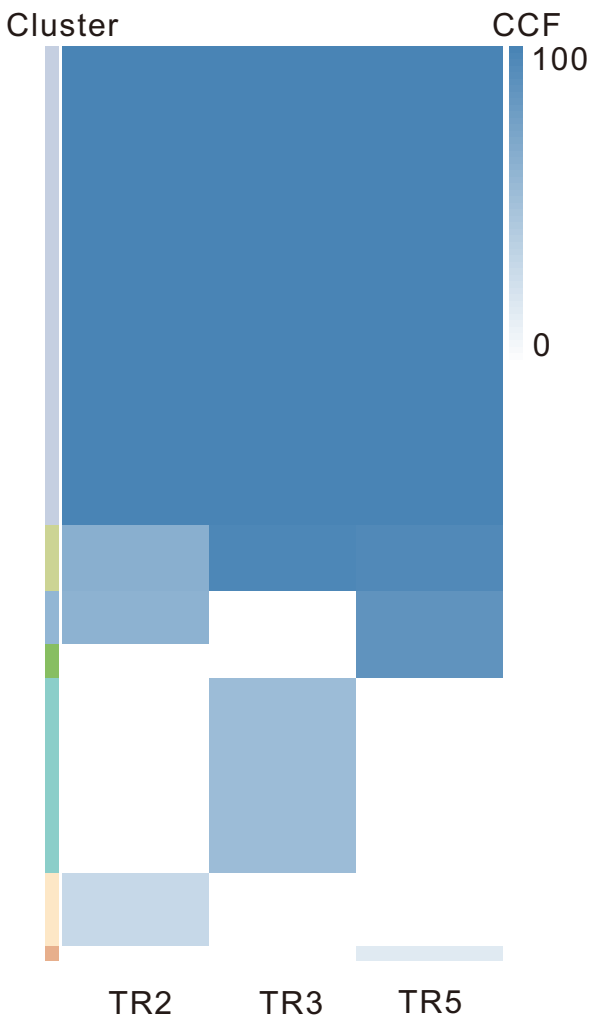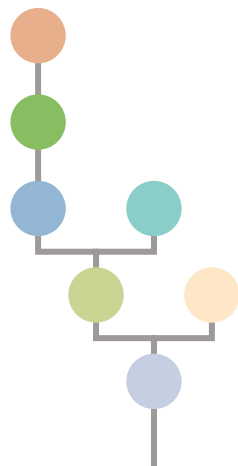

| Gene          | Cytoband | Type  | Cluster |
|---------------|----------|-------|---------|
| <i>APC</i>    | 5q22.2   | SNV   | 1       |
| <i>TP53</i>   | 17p13.1  | SNV   | 1       |
| <i>MAFB</i>   | 20q12    | Amp   | 1       |
| <i>PLCG1</i>  | 20q12    | Amp   | 1       |
| <i>NFATC2</i> | 20q13.2  | Amp   | 1       |
| <i>SALL4</i>  | 20q13.2  | Amp   | 1       |
| <i>GNAS</i>   | 20q13.32 | Amp   | 1       |
| <i>PTK6</i>   | 20q13.33 | Amp   | 1       |
| <i>SRC</i>    | 20q11.23 | Amp   | 2       |
| <i>PIK3CA</i> | 3q26.32  | SNV   | 5       |
| <i>RBM10</i>  | Xp11.23  | InDel | NA      |

## TR2

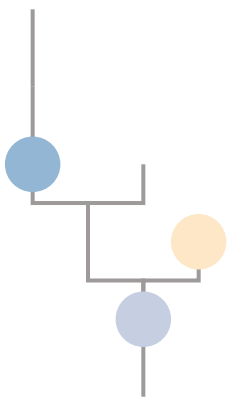

## TR3

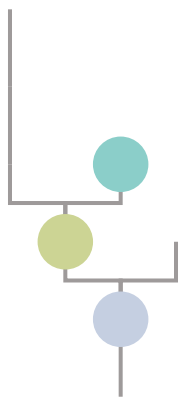

## TR5

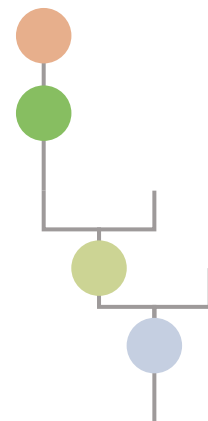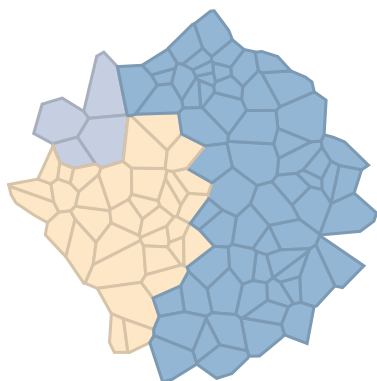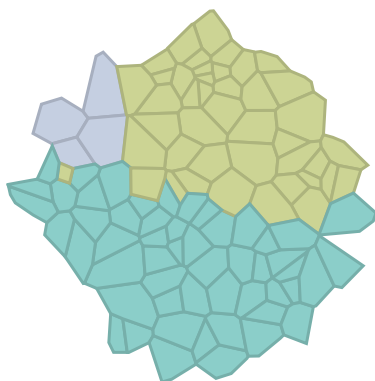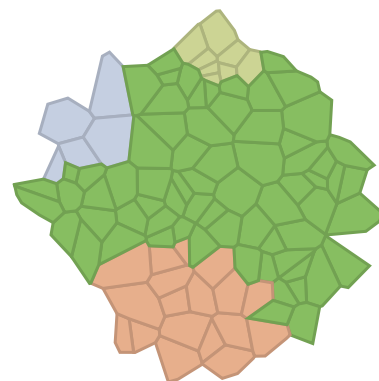

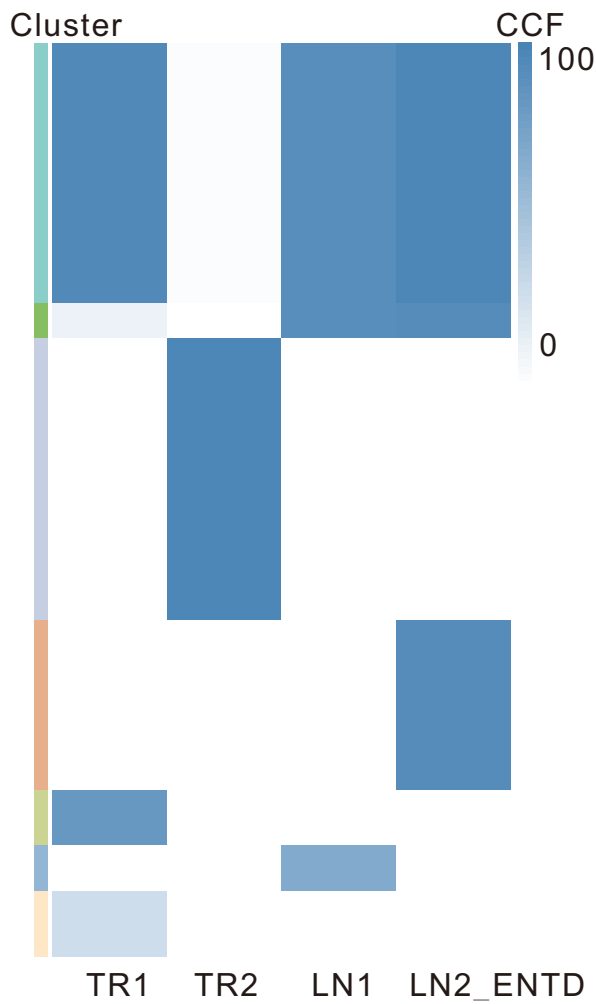

# CRC48

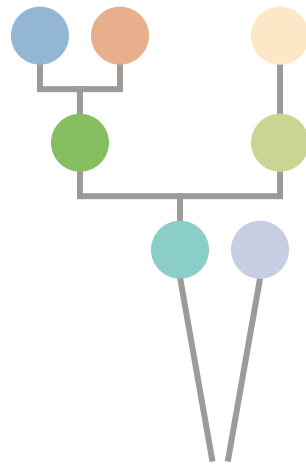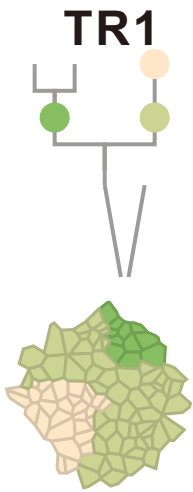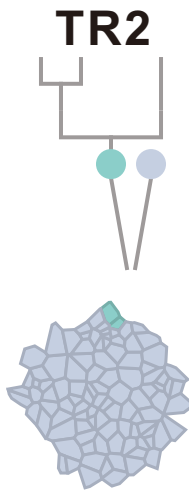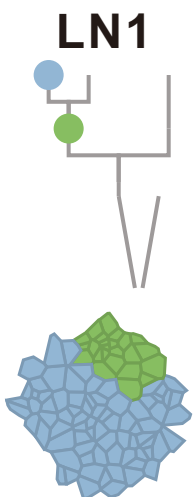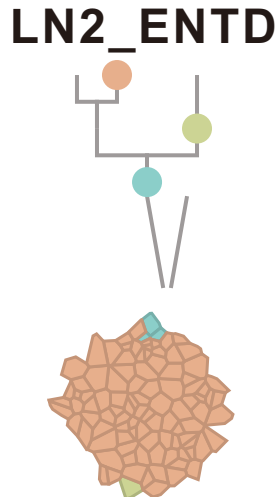

| Gene     | Cyband   | Type  | Cluster |
|----------|----------|-------|---------|
| * APC    | 5q22.2   | InDel | 2       |
| * APC    | 5q22.2   | InDel | 2       |
| FLT3     | 13q12.2  | Amp   | 2       |
| FOXO1    | 13q14.11 | Amp   | 2       |
| CYSLTR2  | 13q14.2  | Amp   | 2       |
| PTPRD    | 9p24.1   | SNV   | 6       |
| RAD21    | 8q24.11  | Amp   | 6       |
| MYC      | 8q24.21  | Amp   | 6       |
| MUC4     | 3q29     | Amp   | 7       |
| PLAG1    | 8q12.1   | Amp   | 7       |
| PREX2    | 8q13.2   | Amp   | 7       |
| NCOA2    | 8q13.3   | Amp   | 7       |
| RUNX1T1  | 8q21.3   | Amp   | 7       |
| HEY1     | 8q21.13  | Amp   | 7       |
| CDH17    | 8q22.1   | Amp   | 7       |
| PABPC1   | 8q22.3   | Amp   | 7       |
| UBR5     | 8q22.3   | Amp   | 7       |
| CASP9    | 1p36.21  | Del   | 7       |
| PRDM2    | 1p36.21  | Del   | 7       |
| SPEN     | 1p36.21  | Del   | 7       |
| CAMTA1   | 1p36.31  | Del   | 7       |
| RPL22    | 1p36.31  | Del   | 7       |
| TNFRSF14 | 1p36.32  | Del   | 7       |
| SDHA     | 5p15.33  | Del   | 7       |
| FEN1     | 11q12.2  | Del   | 7       |
| SDHAF2   | 11q12.2  | Del   | 7       |
| MEN1     | 11q13.1  | Del   | 7       |
| EED      | 11q14.2  | Del   | 7       |
| BIRC3    | 11q22.2  | Del   | 7       |
| ATM      | 11q22.3  | Del   | 7       |
| DDX10    | 11q22.3  | Del   | 7       |
| SDHD     | 11q23.1  | Del   | 7       |
| ZBTB16   | 11q23.2  | Del   | 7       |
| ARHGEF12 | 11q23.3  | Del   | 7       |
| BCL9L    | 11q23.3  | Del   | 7       |
| CBL      | 11q23.3  | Del   | 7       |
| CCNB1IP1 | 14q11.2  | Del   | 7       |
| BAZ1A    | 14q13.2  | Del   | 7       |
| NKX2-1   | 14q13.3  | Del   | 7       |
| MAX      | 14q23.3  | Del   | 7       |
| RAD51B   | 14q24.1  | Del   | 7       |
| BCL11B   | 14q32.2  | Del   | 7       |
| DICER1   | 14q32.13 | Del   | 7       |
| AXIN1    | 16p13.3  | Del   | 7       |
| NTHL1    | 16p13.3  | Del   | 7       |
| TRAF7    | 16p13.3  | Del   | 7       |
| TSC2     | 16p13.3  | Del   | 7       |
| FLCN     | 17p11.2  | Del   | 7       |
| NCOR1    | 17p11.2  | Del   | 7       |
| MAP2K4   | 17p12    | Del   | 7       |
| PER1     | 17p13.1  | Del   | 7       |
| TP53     | 17p13.1  | Del   | 7       |
| YWHAE    | 17p13.3  | Del   | 7       |
| DNM2     | 19p13.2  | Del   | 7       |
| KEAP1    | 19p13.2  | Del   | 7       |
| SMARCA4  | 19p13.2  | Del   | 7       |
| STK11    | 19p13.3  | Del   | 7       |
| TCF3     | 19p13.3  | Del   | 7       |
| ELL      | 19p13.11 | Del   | 7       |
| SIRPA    | 20p13    | Del   | 7       |
| KRAS     | 12p12.1  | SNV   | NA      |
| TP53     | 17p13.1  | SNV   | NA      |
| SMAD4    | 18q21.2  | SNV   | NA      |
| AMER1    | Xq11.2   | SNV   | NA      |
| ATP2B3   | Xq28     | SNV   | NA      |
| LZTR1    | 22q11.21 | InDel | NA      |
| BCORL1   | Xq26.1   | InDel | NA      |

# CRC49 \*

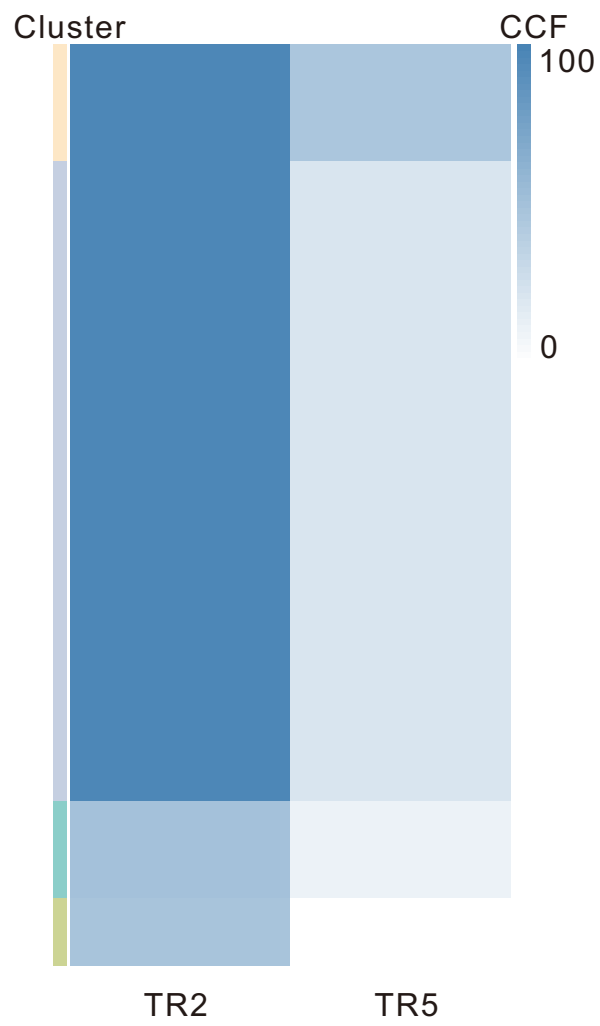

| Gene   | Cytoband | Type | Cluster |
|--------|----------|------|---------|
| * APC  | 5q22.2   | SNV  | 1       |
| * APC  | 5q22.2   | SNV  | 1       |
| TP53   | 17p13.1  | SNV  | 1       |
| MUC4   | 3q29     | Amp  | 3       |
| RECQL4 | 8q24.3   | Amp  | 3       |

## TR2

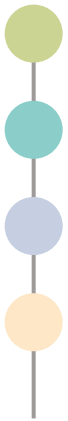

## TR5

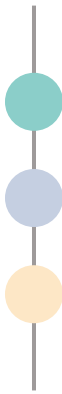

\* One cluster with CCF=0.9 in TR5 and CCF=0.02 in TR2 contains 3 genes, which is filtered out because of the more than 5 scale threshold of cluster.

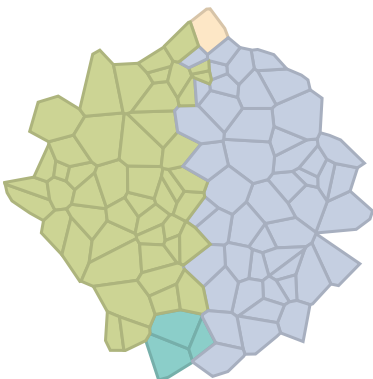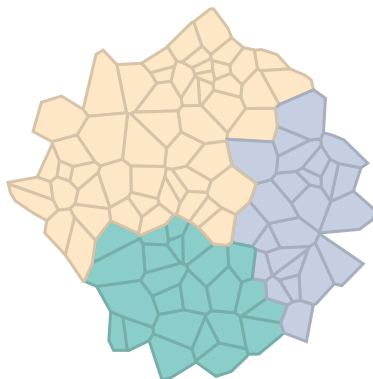

# CRC50

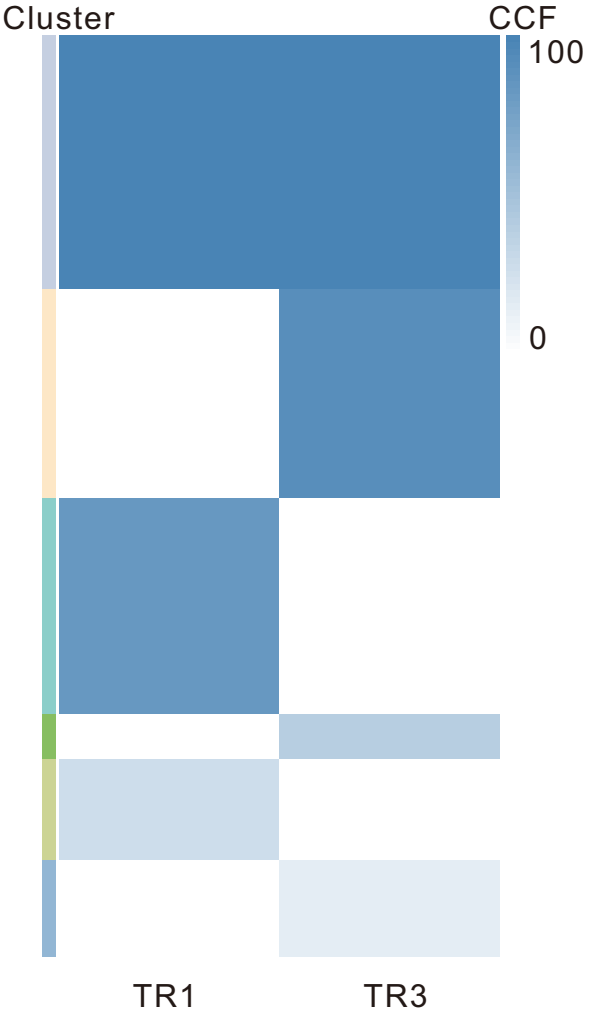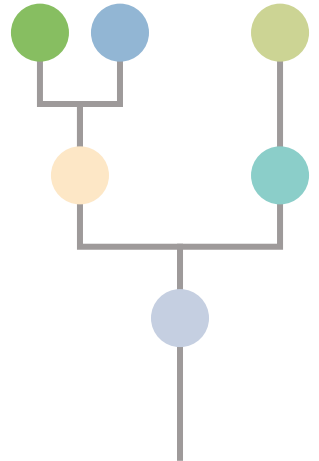

| Gene          | Cytoband | Type  | Cluster |
|---------------|----------|-------|---------|
| <i>ARID1A</i> | 1p36.11  | SNV   | 1       |
| <i>PIK3CA</i> | 3q26.32  | SNV   | 1       |
| <i>KRAS</i>   | 12p12.1  | SNV   | 1       |
| <i>BAP1</i>   | 3p21.1   | InDel | 1       |
| <i>APC</i>    | 5q22.2   | InDel | 1       |
| <i>FBXW7</i>  | 4q31.3   | SNV   | 2       |
| <i>FAT4</i>   | 4q28.1   | SNV   | 3       |
| <i>DICER1</i> | 14q32.13 | InDel | 3       |
| <i>TSC1</i>   | 9q34.13  | SNV   | 5       |

## TR1

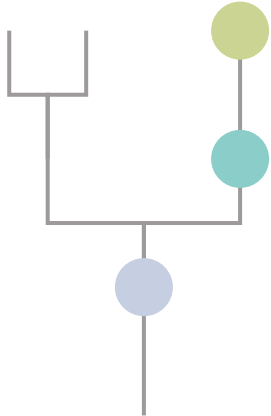

## TR3

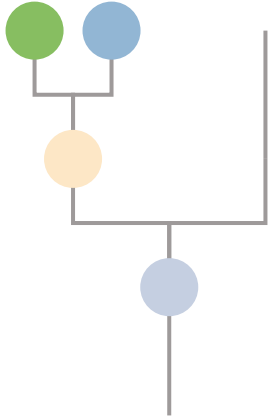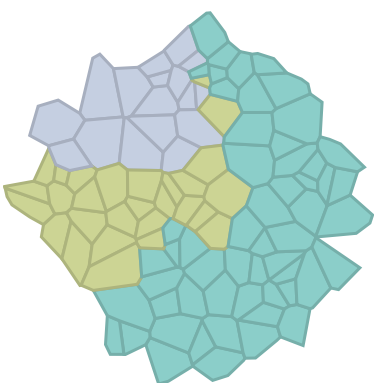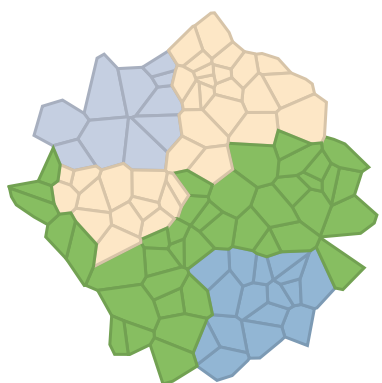

# CRC51

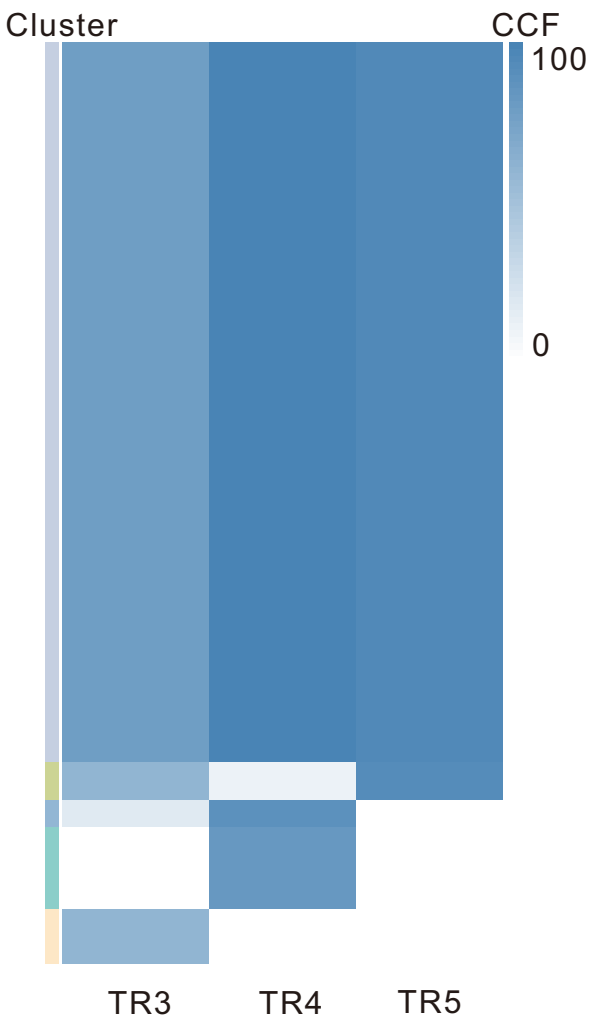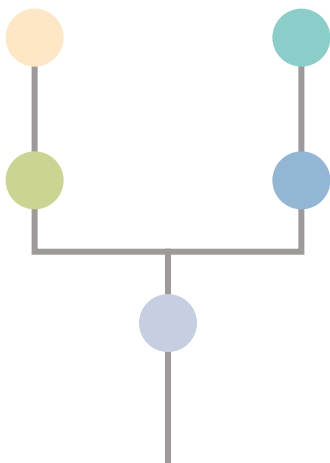

| Gene           | Cytoband | Type  | Cluster |
|----------------|----------|-------|---------|
| <i>CAMTA1</i>  | 1p36.23  | SNV   | 1       |
| <i>*FBXW7</i>  | 4q31.3   | SNV   | 1       |
| <i>*APC</i>    | 5q22.2   | SNV   | 1       |
| <i>KRAS</i>    | 12p12.1  | SNV   | 1       |
| <i>TP53</i>    | 17p13.1  | SNV   | 1       |
| <i>SMAD4</i>   | 18q21.2  | SNV   | 1       |
| <i>*APC</i>    | 5q22.2   | InDel | 1       |
| <i>AXIN2</i>   | 17q24.1  | InDel | 1       |
| <i>LZTR1</i>   | 22q11.21 | InDel | 1       |
| <i>MUC4</i>    | 3q29     | Amp   | 1       |
| <i>RUNX1T1</i> | 8q21.3   | Amp   | 1       |
| <i>CDH17</i>   | 8q22.1   | Amp   | 1       |
| <i>PABPC1</i>  | 8q22.3   | Amp   | 1       |
| <i>UBR5</i>    | 8q22.3   | Amp   | 1       |
| <i>RAD21</i>   | 8q24.11  | Amp   | 1       |
| <i>MYC</i>     | 8q24.21  | Amp   | 1       |
| <i>RECQL4</i>  | 8q24.3   | Amp   | 1       |
| <i>ARNT</i>    | 1q21.3   | Del   | 3       |
| <i>*FBXW7</i>  | 4q31.3   | InDel | 5       |
| <i>FOXP1</i>   | 3p13     | Amp   | NA      |
| <i>MITF</i>    | 3p13     | Amp   | NA      |
| <i>PLAG1</i>   | 8q12.1   | Amp   | NA      |
| <i>PREX2</i>   | 8q13.2   | Amp   | NA      |
| <i>NCOA2</i>   | 8q13.3   | Amp   | NA      |
| <i>HEY1</i>    | 8q21.13  | Amp   | NA      |

## TR3

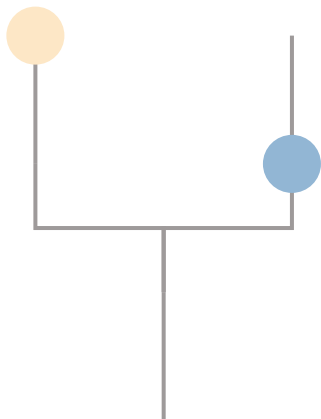

## TR4

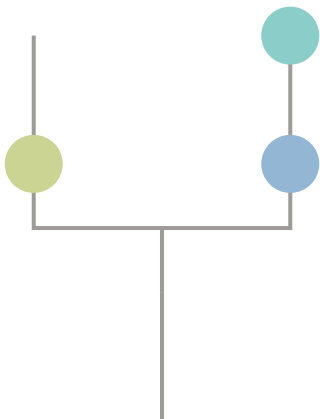

## TR5

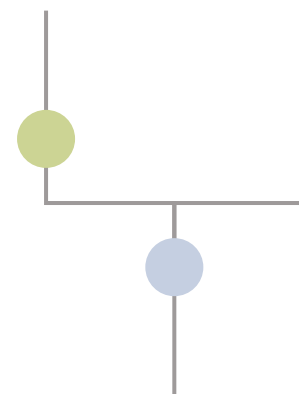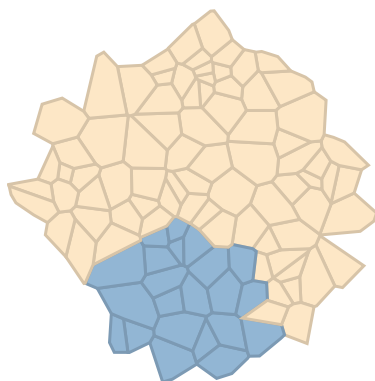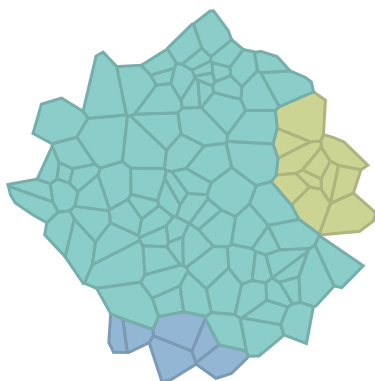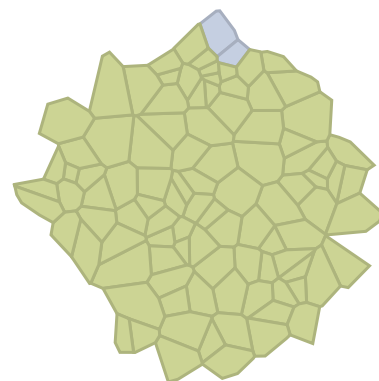

# CRC52

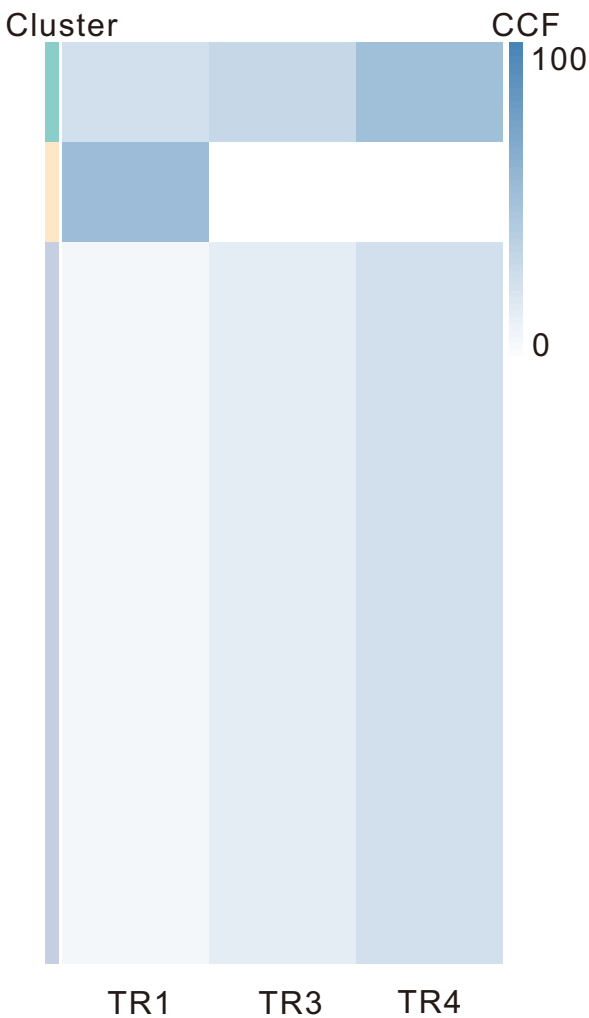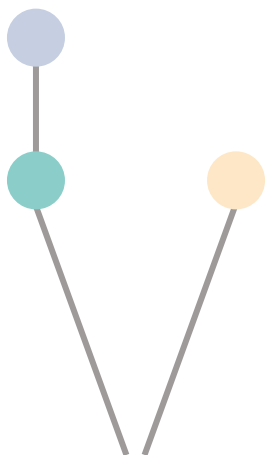

| Gene | Cytoband | Type | Cluster |
|------|----------|------|---------|
| APC  | 5q22.2   | SNV  | 1       |
| TP53 | 17p13.1  | SNV  | 1       |

## TR1

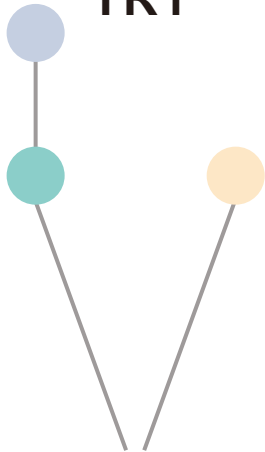

## TR3

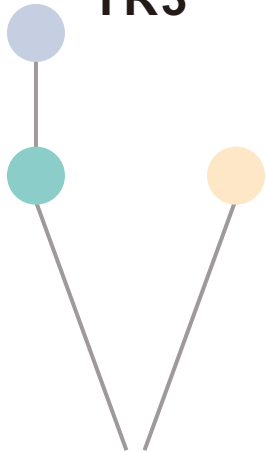

## TR4

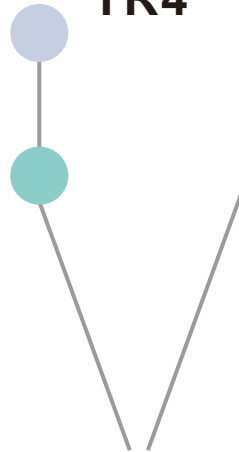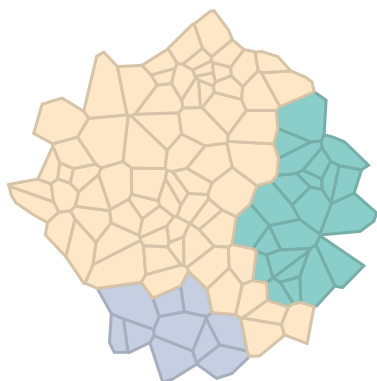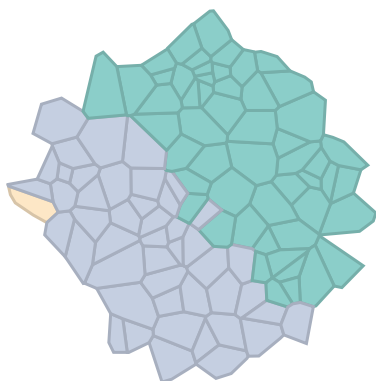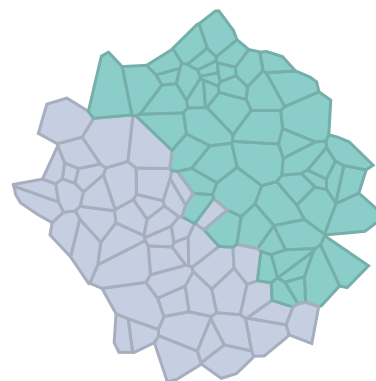

# CRC53

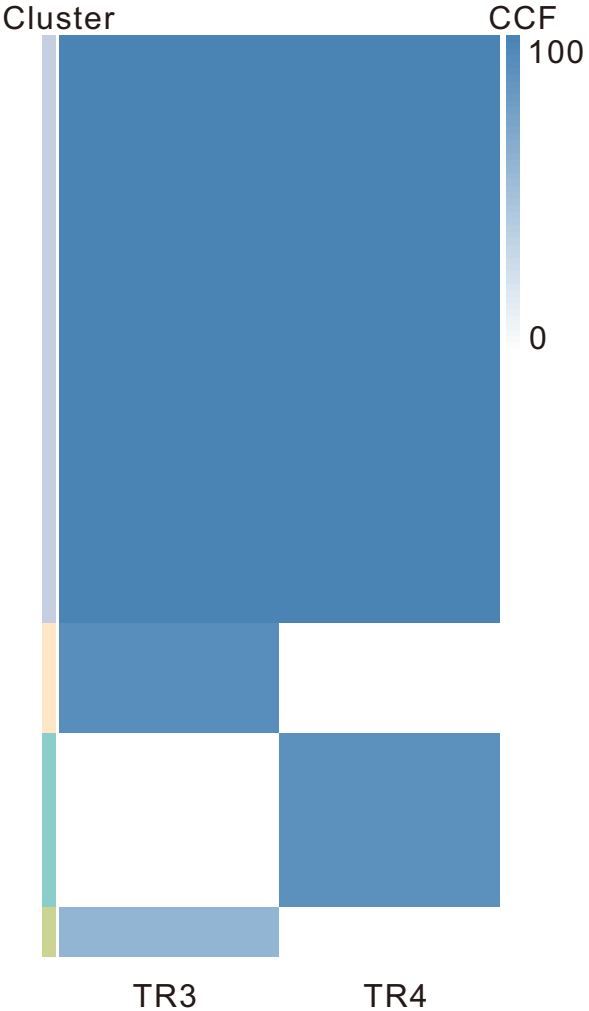

| Gene           | Cytoband | Type  | Cluster |
|----------------|----------|-------|---------|
| <i>FBXW7</i>   | 4q31.3   | SNV   | 1       |
| <i>KRAS</i>    | 12p12.1  | SNV   | 1       |
| <i>TP53</i>    | 17p13.1  | SNV   | 1       |
| <i>SMARCA4</i> | 19p13.2  | SNV   | 1       |
| <i>APC</i>     | 5q22.2   | InDel | 1       |
| <i>LZTR1</i>   | 22q11.21 | InDel | 1       |
| <i>KRAS</i>    | 12p12.1  | Amp   | 2       |
| <i>AMER1</i>   | Xq11.2   | SNV   | NA      |

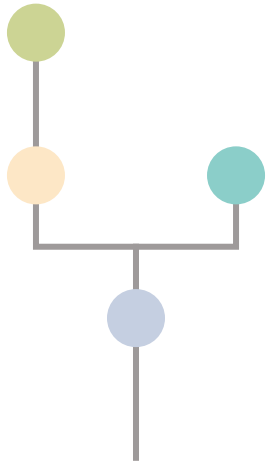

## TR3

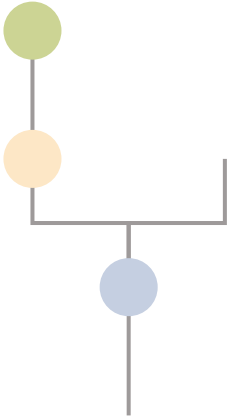

## TR4

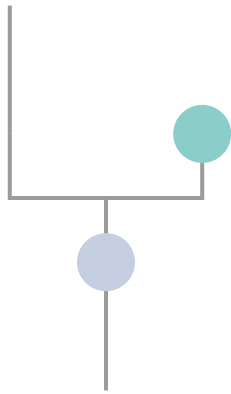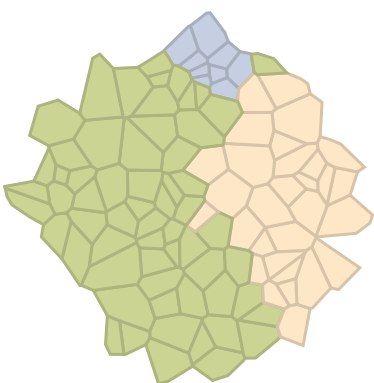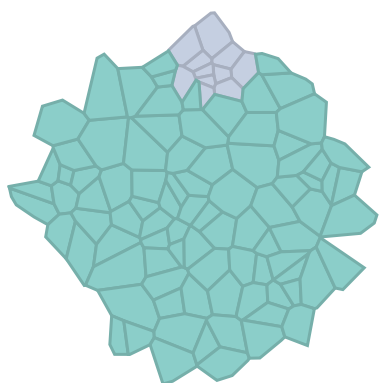



# CRC54

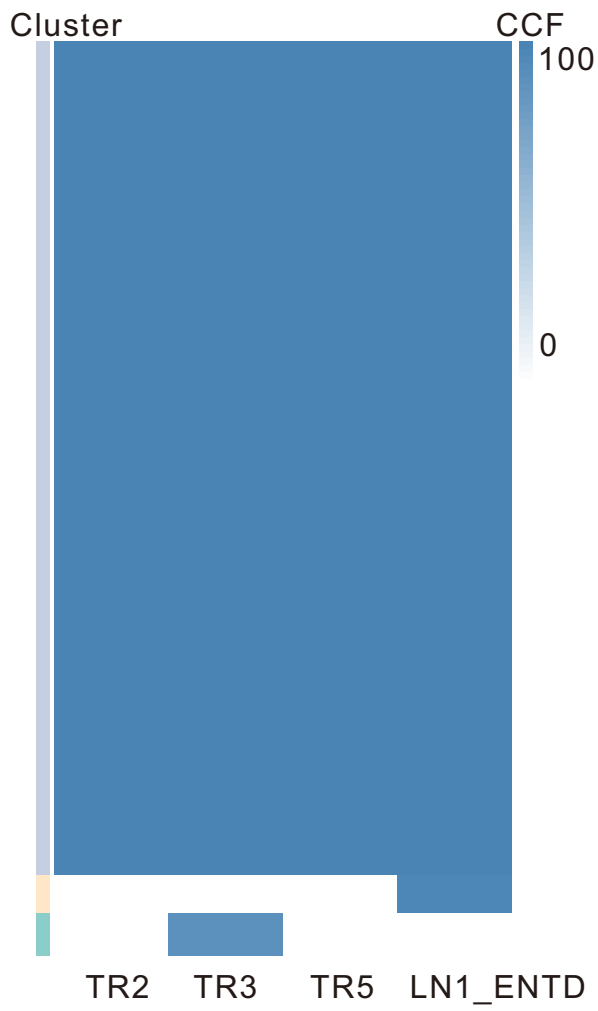

| Gene  | Cytoband | Type  | Cluster |
|-------|----------|-------|---------|
| * APC | 5q22.2   | SNV   | 1       |
| KRAS  | 12p12.1  | SNV   | 1       |
| MAX   | 14q23.3  | SNV   | 1       |
| TP53  | 17p13.1  | SNV   | 1       |
| SMAD4 | 18q21.2  | SNV   | 1       |
| LZTR1 | 22q11.21 | InDel | 1       |
| SSX2  | Xp11.22  | Amp   | 1       |
| ARAF  | Xp11.23  | Amp   | 1       |
| GATA1 | Xp11.23  | Amp   | 1       |
| SSX1  | Xp11.23  | Amp   | 1       |
| SSX4  | Xp11.23  | Amp   | 1       |
| TFE3  | Xp11.23  | Amp   | 1       |
| WAS   | Xp11.23  | Amp   | 1       |
| KDM6A | Xp11.3   | Amp   | 1       |
| * APC | 5q22.2   | SNV   | NA      |
| AMER1 | Xq11.2   | SNV   | NA      |
| HRAS  | 11p15.5  | Amp   | NA      |

TR2 TR3 TR5 LN1\_ENTD

## TR2

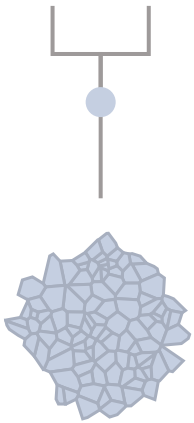

## TR3

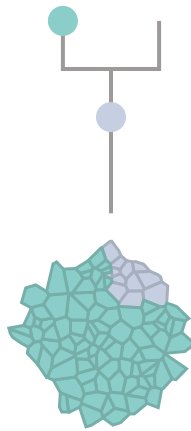

## TR5

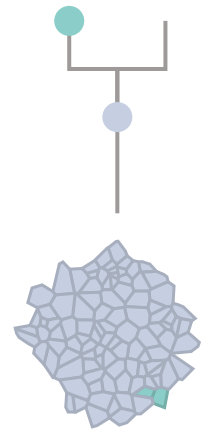

## LN1\_ENTD

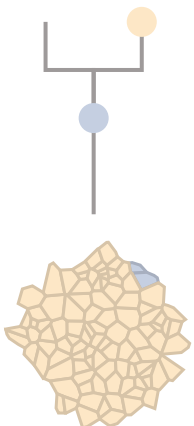

# CRC55

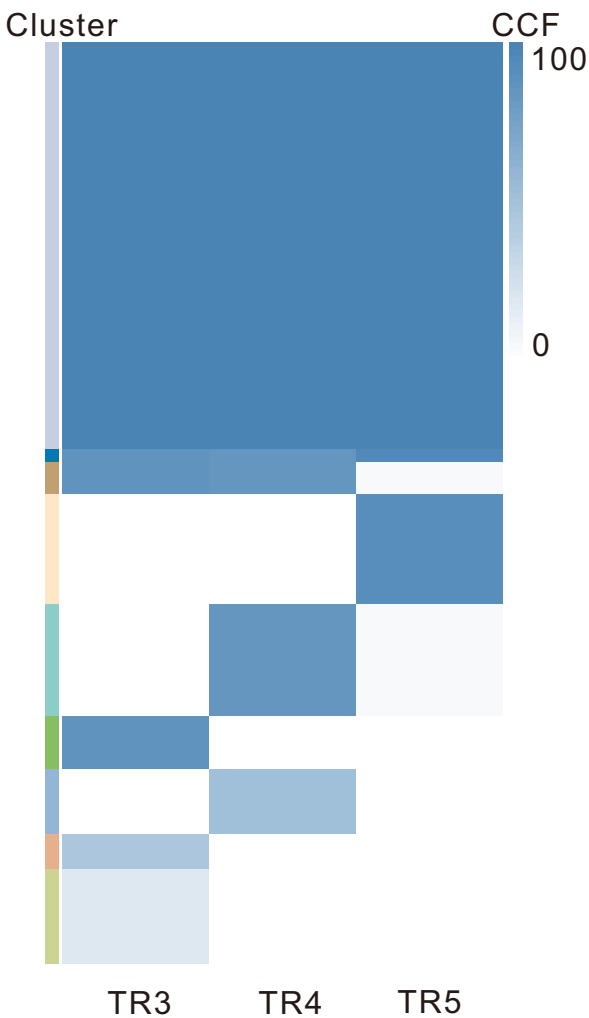

| Gene      | Cytoband | Type  | Cluster |
|-----------|----------|-------|---------|
| APC       | 5q22.2   | SNV   | 1       |
| CDH1      | 16q22.1  | SNV   | 1       |
| TP53      | 17p13.1  | SNV   | 1       |
| ARID1A    | 1p36.11  | InDel | 1       |
| EGFR      | 7p11.2   | Amp   | 1       |
| HNRNPA2B1 | 7p15.2   | Amp   | 1       |
| HOXA11    | 7p15.2   | Amp   | 1       |
| HOXA13    | 7p15.2   | Amp   | 1       |
| HOXA9     | 7p15.2   | Amp   | 1       |
| MACC1     | 7p21.1   | Amp   | 1       |
| ETV1      | 7p21.2   | Amp   | 1       |
| RAC1      | 7p22.1   | Amp   | 1       |
| CARD11    | 7p22.2   | Amp   | 1       |
| FLT3      | 13q12.2  | Amp   | 1       |
| FOXO1     | 13q14.11 | Amp   | 1       |
| CYSLTR2   | 13q14.2  | Amp   | 1       |
| SRC       | 20q11.23 | Amp   | 1       |
| MUC4      | 3q29     | Amp   | 2       |
| NCOR1     | 17p12    | SNV   | 3       |
| MAFB      | 20q12    | Amp   | 3       |
| PLCG1     | 20q12    | Amp   | 3       |
| NFATC2    | 20q13.2  | Amp   | 3       |
| SALL4     | 20q13.2  | Amp   | 3       |
| GNAS      | 20q13.32 | Amp   | 3       |
| PTK6      | 20q13.33 | Amp   | 3       |
| AR        | Xq12     | SNV   | NA      |

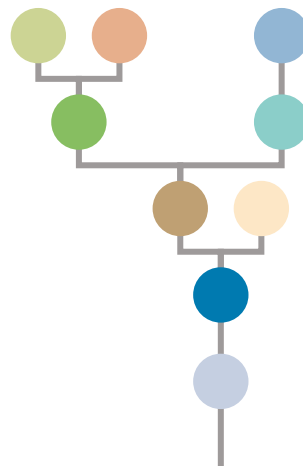

## TR3

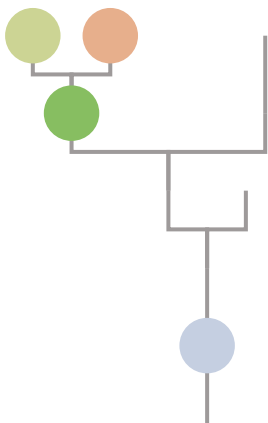

## TR4

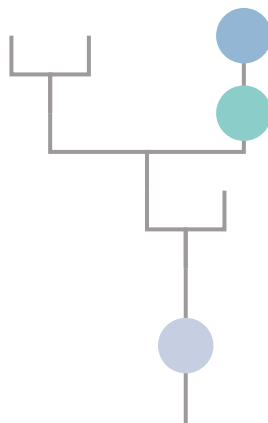

## TR5

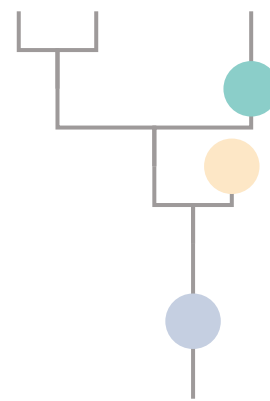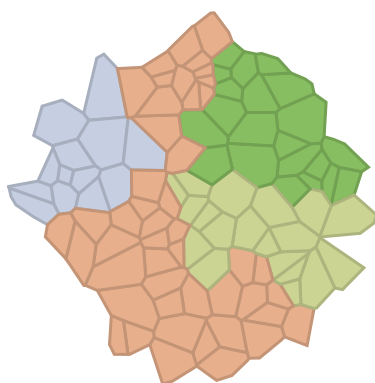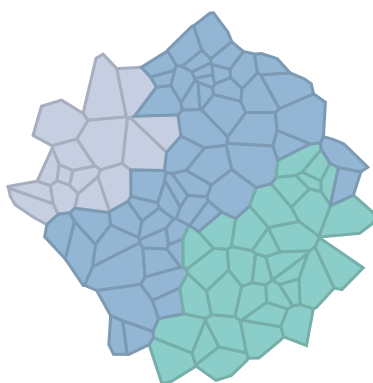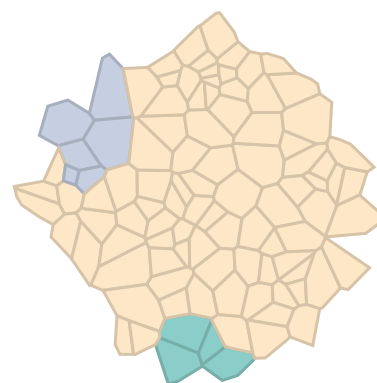

# CRC56

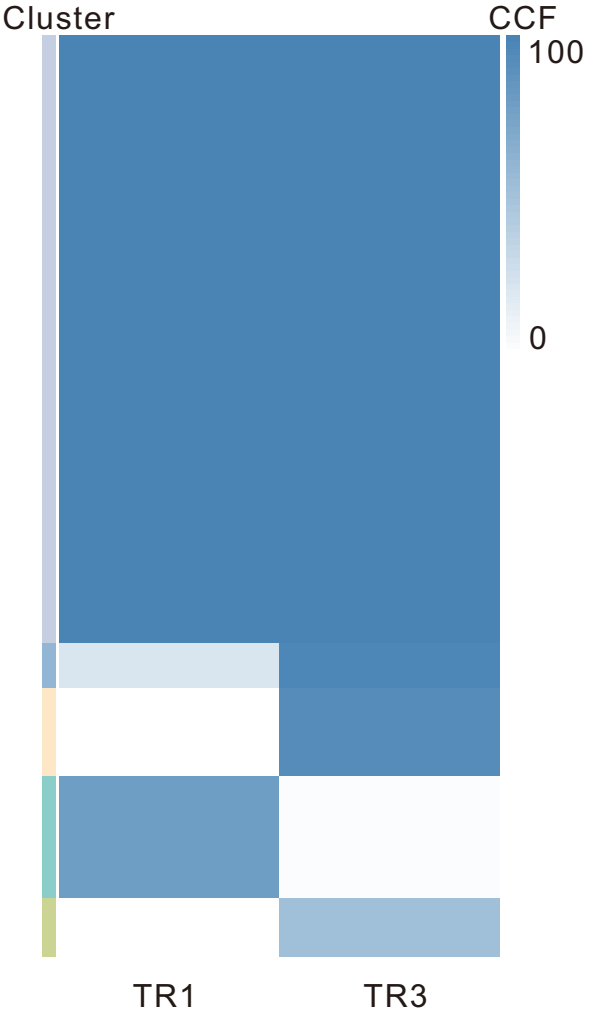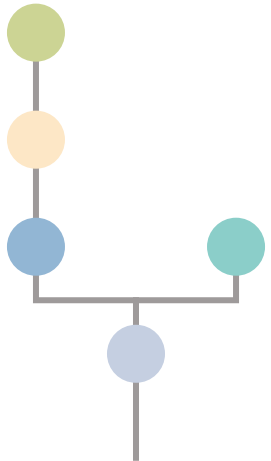

| Gene            | Cytoband | Type  | Cluster |
|-----------------|----------|-------|---------|
| <i>PIK3CA</i>   | 3q26.32  | SNV   | 1       |
| <i>KDR</i>      | 4q12     | SNV   | 1       |
| * <i>FBXW7</i>  | 4q31.3   | SNV   | 1       |
| * <i>APC</i>    | 5q22.2   | SNV   | 1       |
| <i>TP53</i>     | 17p13.1  | SNV   | 1       |
| <i>BCL9L</i>    | 11q23.3  | InDel | 1       |
| <i>SRC</i>      | 20q11.23 | Amp   | 1       |
| <i>MAFB</i>     | 20q12    | Amp   | 1       |
| <i>PLCG1</i>    | 20q12    | Amp   | 1       |
| <i>NFATC2</i>   | 20q13.2  | Amp   | 1       |
| <i>SALL4</i>    | 20q13.2  | Amp   | 1       |
| <i>GNAS</i>     | 20q13.32 | Amp   | 1       |
| <i>PTK6</i>     | 20q13.33 | Amp   | 1       |
| <i>ARHGEF10</i> | 8p23.3   | Del   | 1       |
| * <i>FBXW7</i>  | 4q31.3   | SNV   | 5       |
| * <i>APC</i>    | 5q22.2   | SNV   | 5       |
| <i>RBM10</i>    | Xp11.23  | SNV   | NA      |

## TR1

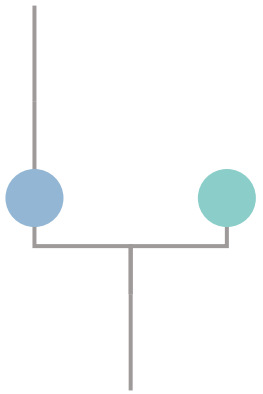

## TR3

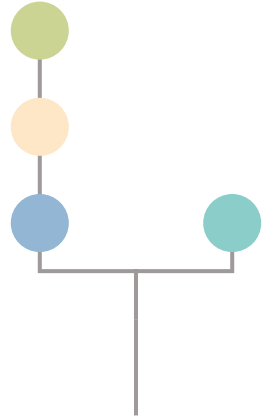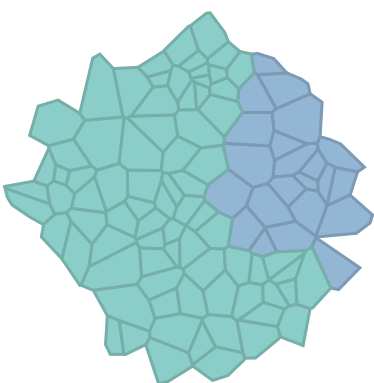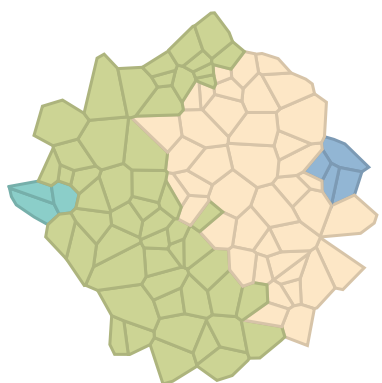

# CRC57

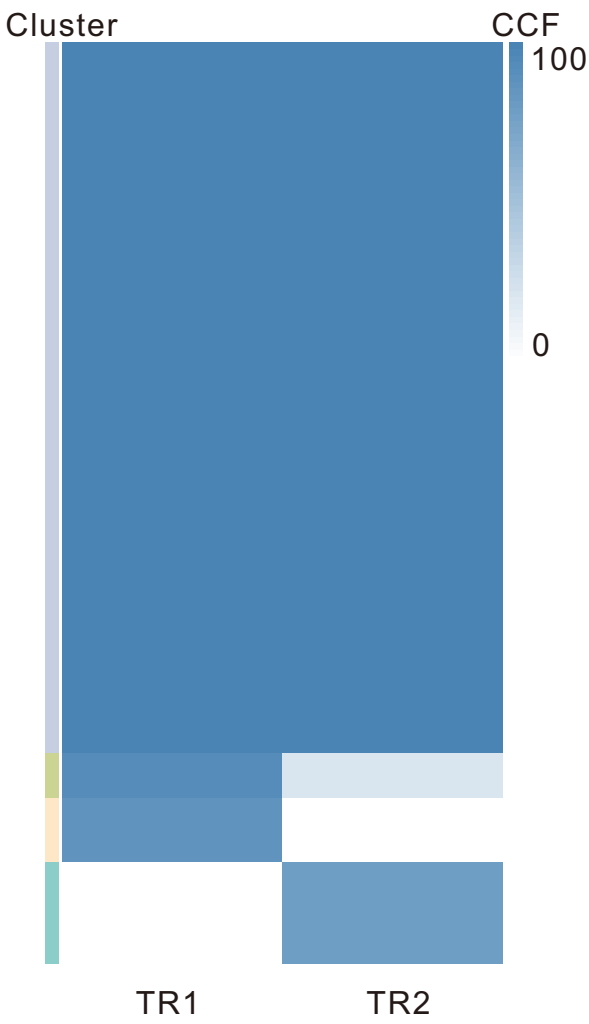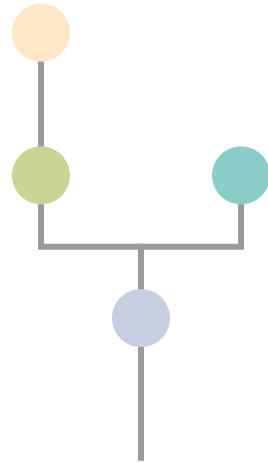

| Gene  | Cytoband | Type  | Cluster |
|-------|----------|-------|---------|
| SETD2 | 3p21.31  | SNV   | 1       |
| KRAS  | 12p12.1  | SNV   | 1       |
| AXIN2 | 17q24.1  | InDel | NA      |

## TR1

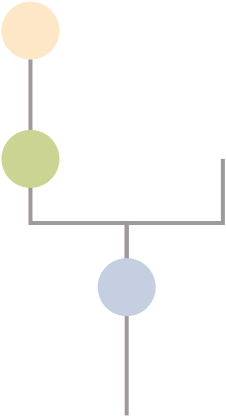

## TR2

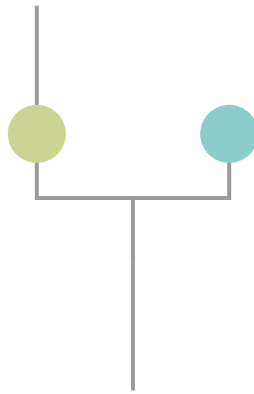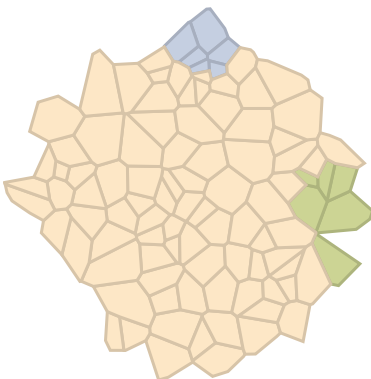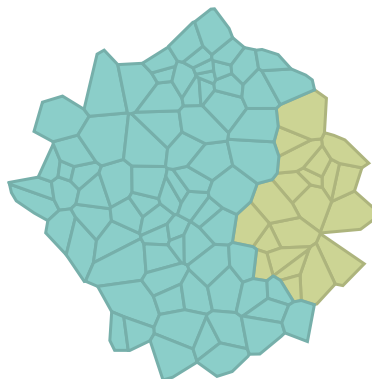

# CRC58

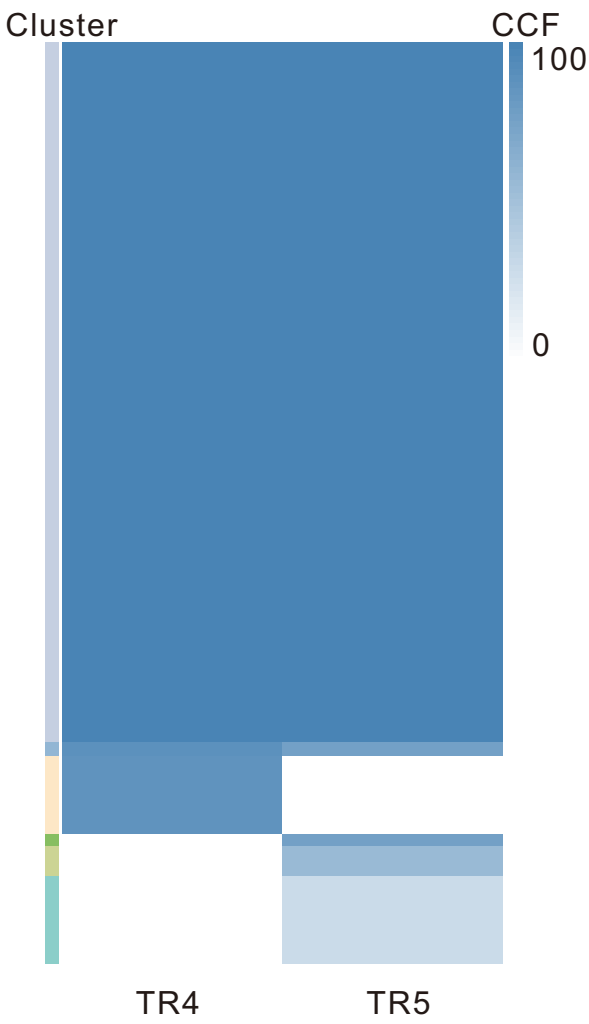

| Gene           | Cytoband | Type  | Cluster |
|----------------|----------|-------|---------|
| <i>CTNNB1</i>  | 3p22.1   | SNV   | 1       |
| <i>ATR</i>     | 3q23     | SNV   | 1       |
| <i>TP53</i>    | 17p13.1  | SNV   | 1       |
| <i>EGFR</i>    | 7p11.2   | Amp   | 1       |
| <i>PLAG1</i>   | 8q12.1   | Amp   | 1       |
| <i>PREX2</i>   | 8q13.2   | Amp   | 1       |
| <i>NCOA2</i>   | 8q13.3   | Amp   | 1       |
| <i>RUNX1T1</i> | 8q21.3   | Amp   | 1       |
| <i>HEY1</i>    | 8q21.13  | Amp   | 1       |
| <i>CDH17</i>   | 8q22.1   | Amp   | 1       |
| <i>PABPC1</i>  | 8q22.3   | Amp   | 1       |
| <i>UBR5</i>    | 8q22.3   | Amp   | 1       |
| <i>RECQL4</i>  | 8q24.3   | Amp   | 1       |
| <i>RAD21</i>   | 8q24.11  | Amp   | 1       |
| <i>MYC</i>     | 8q24.21  | Amp   | 1       |
| <i>FLT3</i>    | 13q12.2  | Amp   | 1       |
| <i>SRC</i>     | 20q11.23 | Amp   | 1       |
| <i>MAFB</i>    | 20q12    | Amp   | 1       |
| <i>PLCG1</i>   | 20q12    | Amp   | 1       |
| <i>NFATC2</i>  | 20q13.2  | Amp   | 1       |
| <i>SALL4</i>   | 20q13.2  | Amp   | 1       |
| <i>LZTR1</i>   | 22q11.21 | InDel | 3       |
| <i>GNAS</i>    | 20q13.32 | Amp   | NA      |

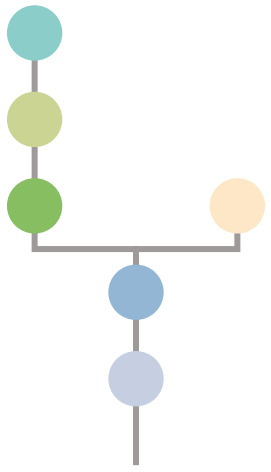

## TR4

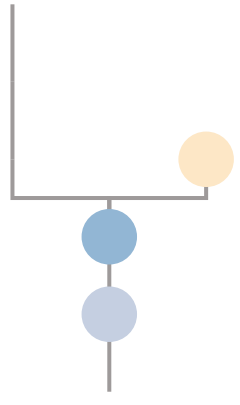

## TR5

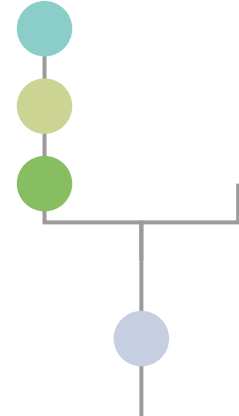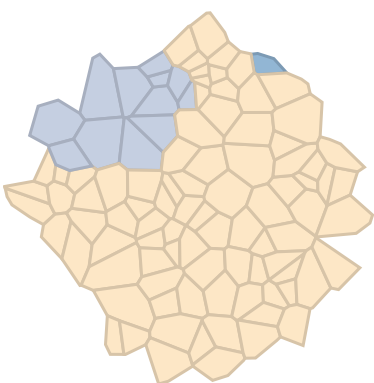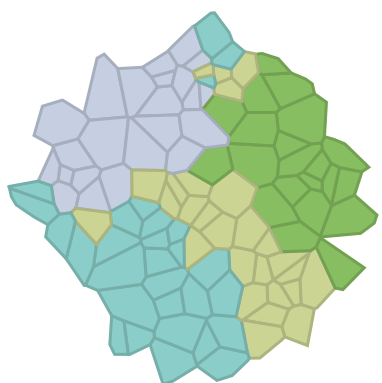

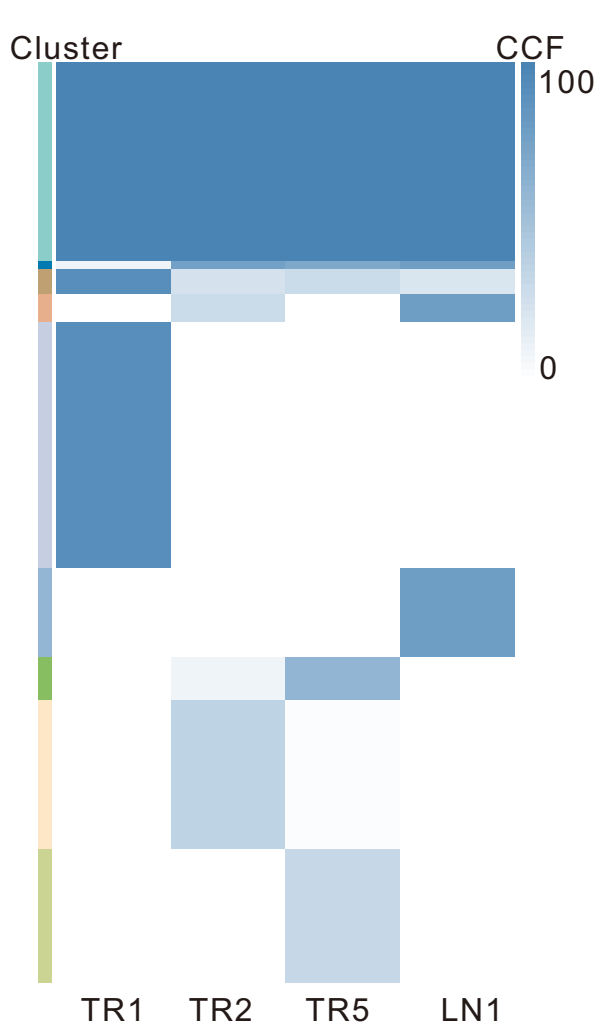

# CRC59

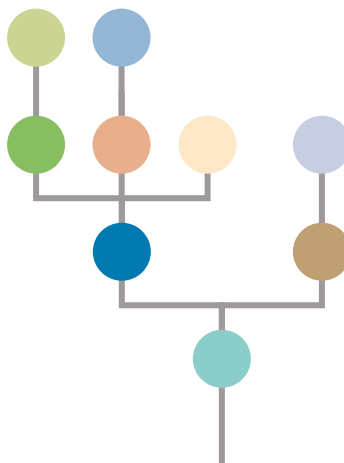

| Gene            | Cytoband | Type  | Cluster |
|-----------------|----------|-------|---------|
| <i>LRP1B</i>    | 2q22.1   | SNV   | 2       |
| <i>*APC</i>     | 5q22.2   | SNV   | 2       |
| <i>TCF7L2</i>   | 10q25.3  | SNV   | 2       |
| <i>TP53</i>     | 17p13.1  | SNV   | 2       |
| <i>*APC</i>     | 5q22.2   | InDel | 2       |
| <i>FLT3</i>     | 13q12.2  | Amp   | 2       |
| <i>SRC</i>      | 20q11.23 | Amp   | 2       |
| <i>MAFB</i>     | 20q12    | Amp   | 2       |
| <i>PLCG1</i>    | 20q12    | Amp   | 2       |
| <i>NFATC2</i>   | 20q13.2  | Amp   | 2       |
| <i>SALL4</i>    | 20q13.2  | Amp   | 2       |
| <i>GNAS</i>     | 20q13.32 | Amp   | 2       |
| <i>PTK6</i>     | 20q13.33 | Amp   | 2       |
| <i>LEPROTL1</i> | 8p12     | Del   | 2       |
| <i>WRN</i>      | 8p12     | Del   | 2       |
| <i>ARHGEF10</i> | 8p23.3   | Del   | 2       |
| <i>SMAD2</i>    | 18q21.1  | Del   | 2       |
| <i>SMAD4</i>    | 18q21.2  | Del   | 2       |
| <i>RUNX1</i>    | 21q22.12 | Del   | 2       |
| <i>PIK3CA</i>   | 3q26.32  | SNV   | 3       |
| <i>CHD2</i>     | 15q26.1  | SNV   | 3       |
| <i>CREBBP</i>   | 16p13.3  | SNV   | 4       |
| <i>PBRM1</i>    | 3p21.1   | InDel | 4       |
| <i>IKBKB</i>    | 8p11.21  | Amp   | 8       |
| <i>KAT6A</i>    | 8p11.21  | Amp   | 8       |
| <i>PLAG1</i>    | 8q12.1   | Amp   | 8       |
| <i>RUNX1T1</i>  | 8q21.3   | Amp   | 8       |
| <i>CDH17</i>    | 8q22.1   | Amp   | 8       |
| <i>PABPC1</i>   | 8q22.3   | Amp   | 8       |
| <i>UBR5</i>     | 8q22.3   | Amp   | 8       |
| <i>RAD21</i>    | 8q24.11  | Amp   | 8       |
| <i>MYC</i>      | 8q24.21  | Amp   | 8       |
| <i>NRG1</i>     | 8p12     | Del   | 8       |
| <i>HEY1</i>     | 8q21.13  | Amp   | NA      |
| <i>OLIG2</i>    | 21q22.11 | Amp   | NA      |

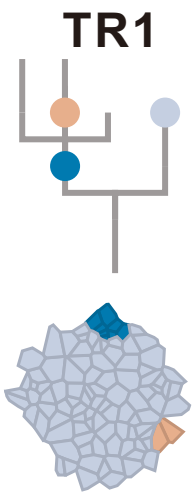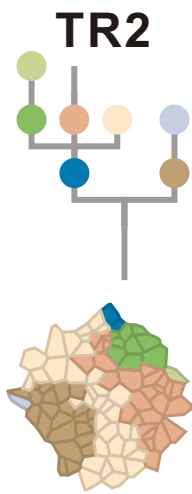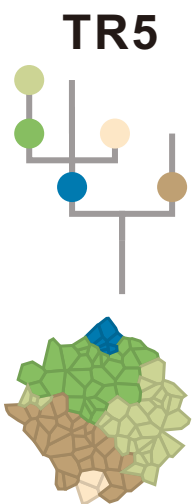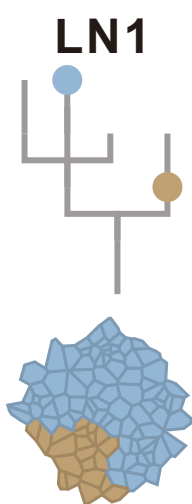

# CRC60

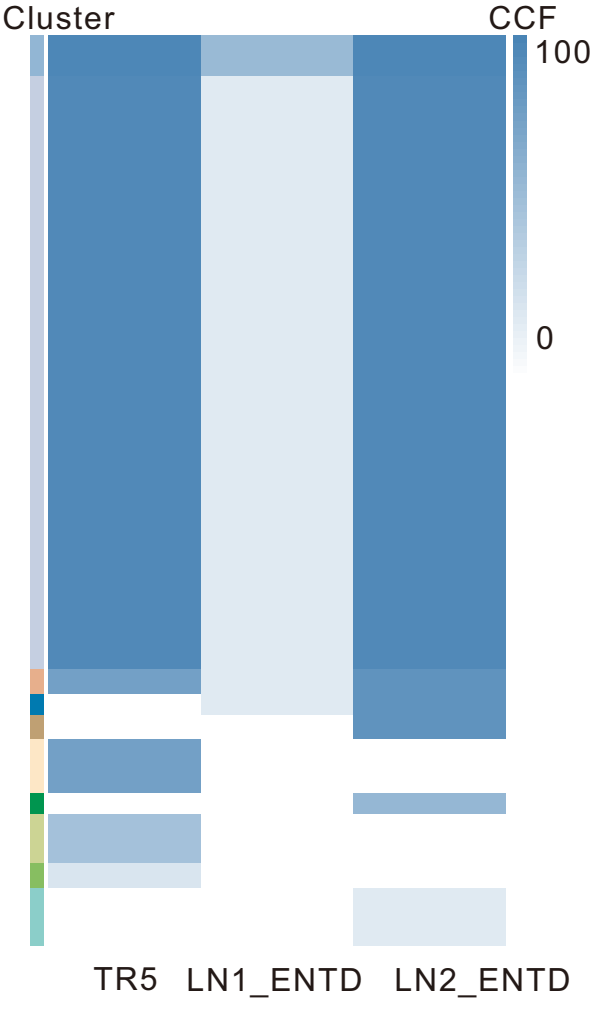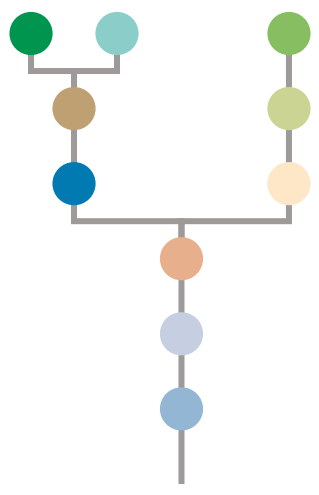

| Gene           | Cytoband | Type  | Cluster |
|----------------|----------|-------|---------|
| <i>TGFBR2</i>  | 3p24.1   | SNV   | 1       |
| <i>KRAS</i>    | 12p12.1  | SNV   | 1       |
| <i>TP53</i>    | 17p13.1  | SNV   | 1       |
| * <i>APC</i>   | 5q22.2   | InDel | 1       |
| * <i>APC</i>   | 5q22.2   | InDel | 1       |
| <i>FLT3</i>    | 13q12.2  | Amp   | 5       |
| <i>CYSLTR2</i> | 13q14.2  | Amp   | 5       |
| <i>FOXO1</i>   | 13q14.11 | Amp   | 5       |

## TR5

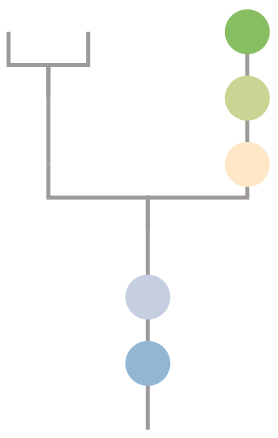

## LN1\_ENTD

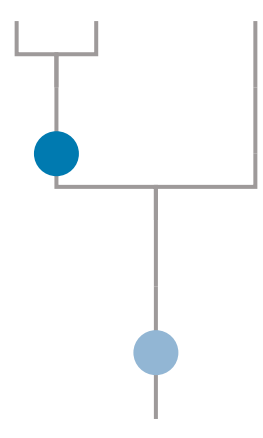

## LN2\_ENTD

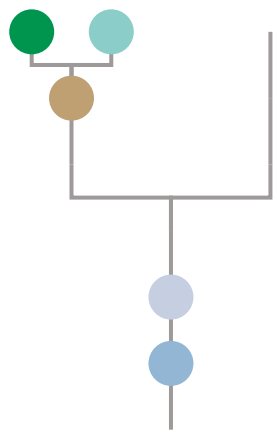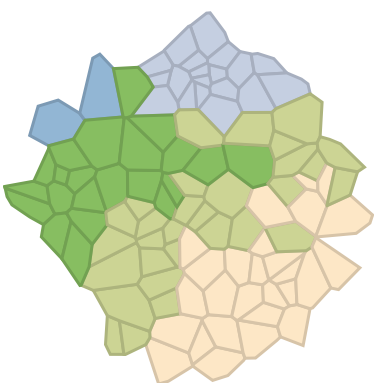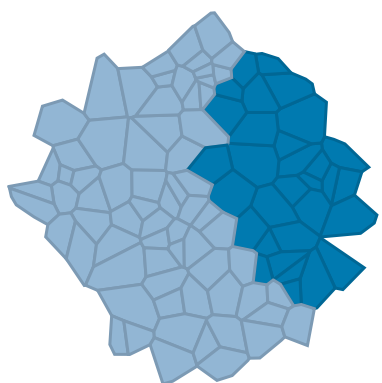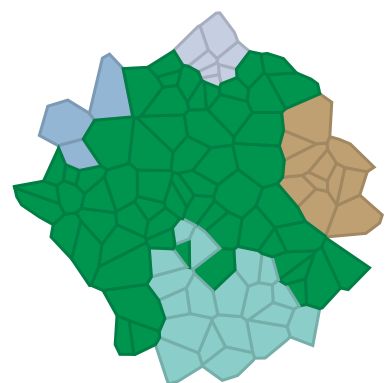

# CRC61

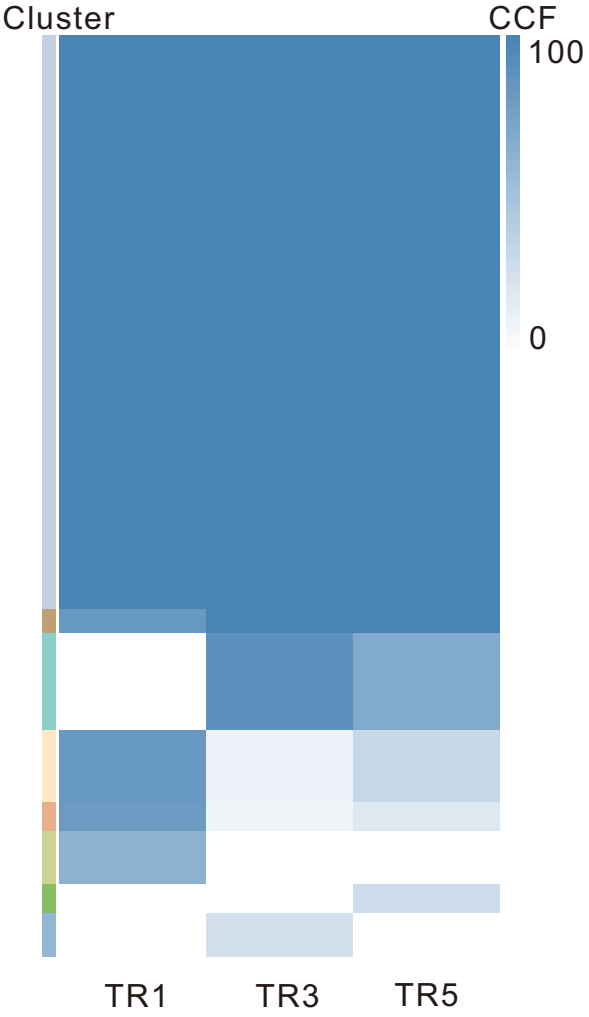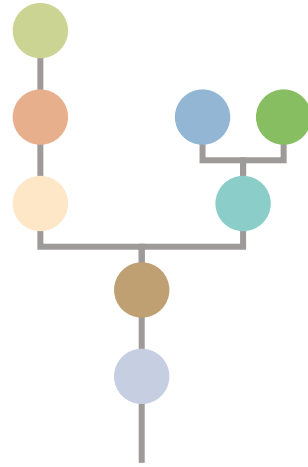

| Gene          | Cytoband | Type | Cluster |
|---------------|----------|------|---------|
| <i>ARID1A</i> | 1p36.11  | SNV  | 1       |
| <i>FBXW7</i>  | 4q31.3   | SNV  | 1       |
| <i>APC</i>    | 5q22.2   | SNV  | 1       |
| <i>TCF7L2</i> | 10q25.3  | SNV  | 1       |
| <i>KRAS</i>   | 12p12.1  | SNV  | 1       |
| <i>TP53</i>   | 17p13.1  | SNV  | 1       |
| <i>AMER1</i>  | Xq11.2   | SNV  | NA      |

## TR1

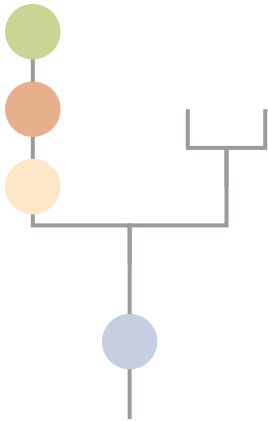

## TR3

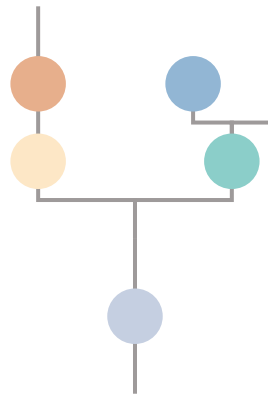

## TR5

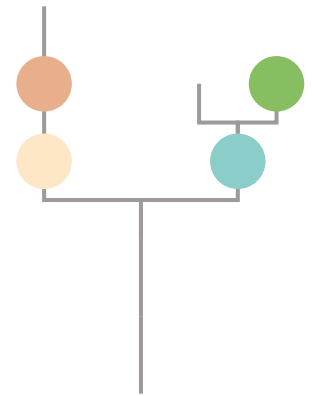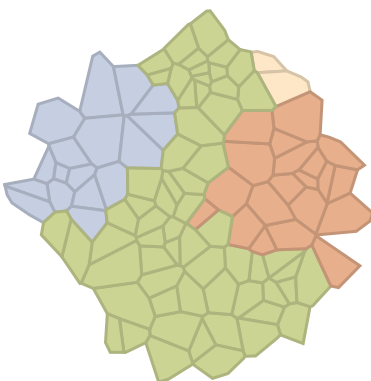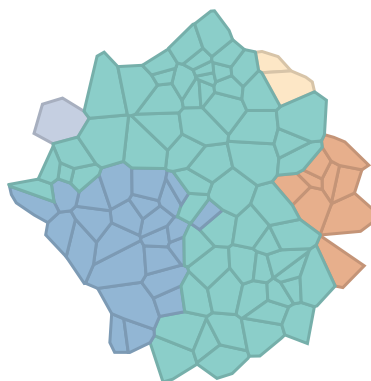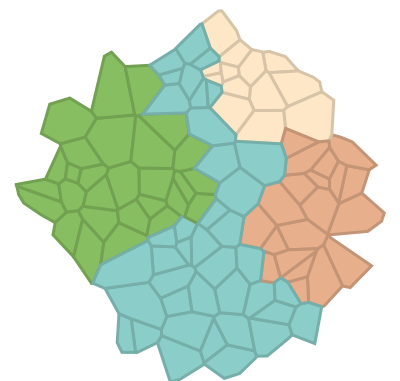



# CRC62

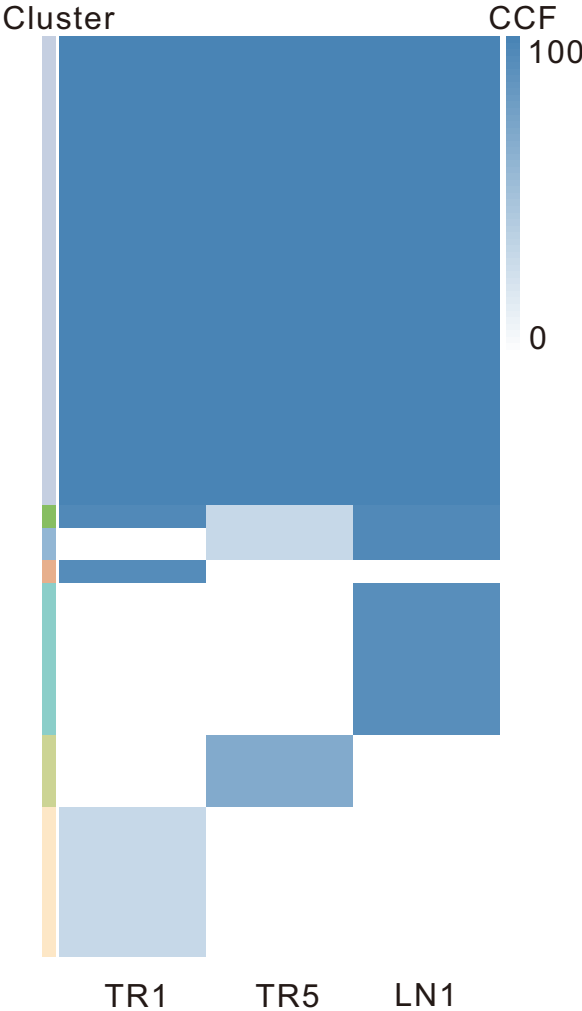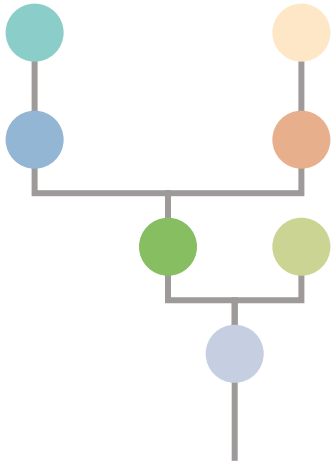

| Gene          | Cytoband | Type  | Cluster |
|---------------|----------|-------|---------|
| <i>TP53</i>   | 17p13.1  | SNV   | 1       |
| <i>ARID1A</i> | 1p36.11  | InDel | 1       |
| <i>IL7R</i>   | 5p13.2   | Amp   | 1       |
| <i>CTNND2</i> | 5p15.2   | Amp   | 1       |
| <i>TERT</i>   | 5p15.33  | Amp   | 1       |
| <i>SRC</i>    | 20q11.23 | Amp   | 1       |
| <i>MAFB</i>   | 20q12    | Amp   | 1       |
| <i>PLCG1</i>  | 20q12    | Amp   | 1       |
| <i>NFATC2</i> | 20q13.2  | Amp   | 1       |
| <i>SALL4</i>  | 20q13.2  | Amp   | 1       |
| <i>GNAS</i>   | 20q13.32 | Amp   | 1       |
| <i>PTK6</i>   | 20q13.33 | Amp   | 1       |
| <i>GPC5</i>   | 13q31.3  | SNV   | NA      |

## TR1

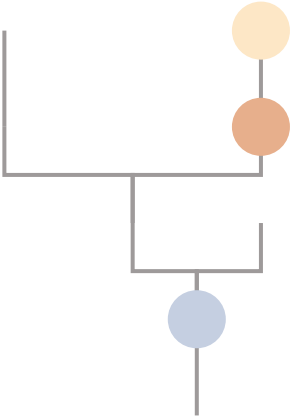

## TR5

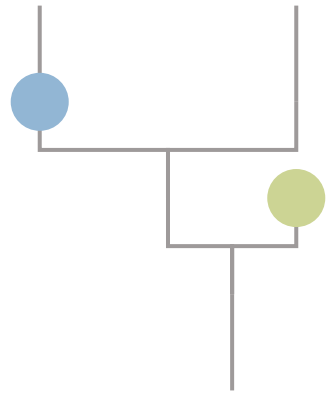

## LN1

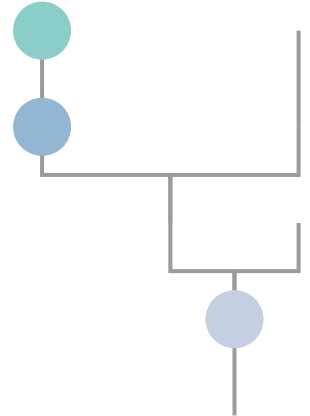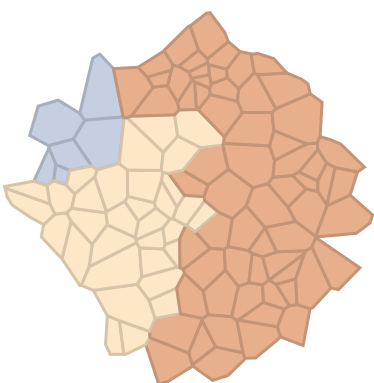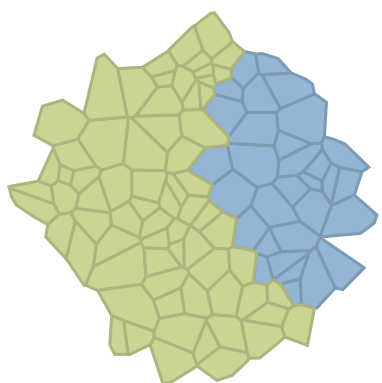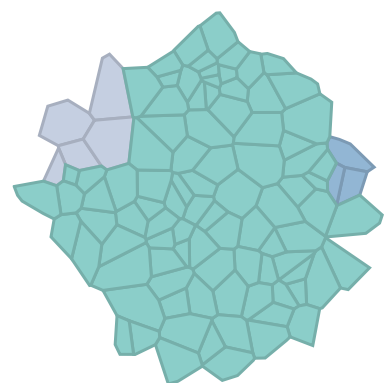

# CRC63

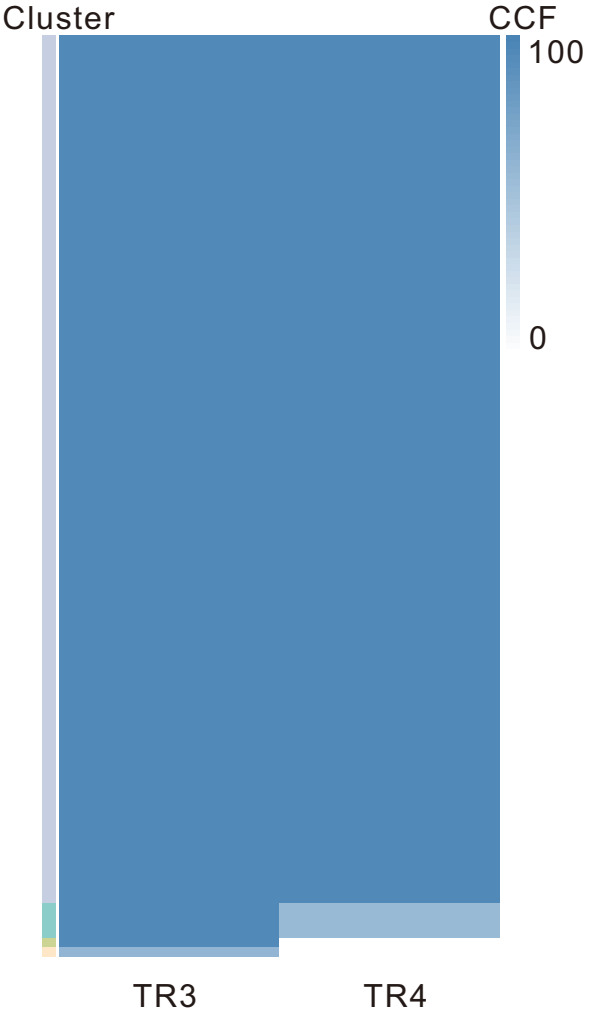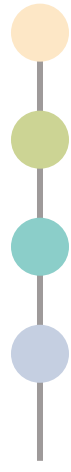

| Gene            | Cytoband | Type  | Cluster |
|-----------------|----------|-------|---------|
| <i>ARNT</i>     | 1q21.3   | SNV   | 1       |
| <i>ASXL2</i>    | 2p23.3   | SNV   | 1       |
| <i>FBXW7</i>    | 4q31.3   | SNV   | 1       |
| * <i>APC</i>    | 5q22.2   | SNV   | 1       |
| <i>TSC1</i>     | 9q34.13  | SNV   | 1       |
| * <i>TSC2</i>   | 16p13.3  | SNV   | 1       |
| * <i>TSC2</i>   | 16p13.3  | SNV   | 1       |
| <i>ERBB2</i>    | 17q12    | SNV   | 1       |
| <i>ARHGAP26</i> | 5q31.3   | SNV   | 2       |
| * <i>APC</i>    | 5q22.2   | InDel | 2       |
| <i>TP53</i>     | 17p13.1  | SNV   | NA      |

## TR3

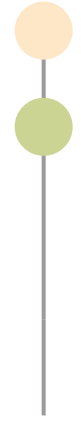

## TR4

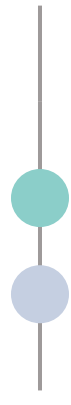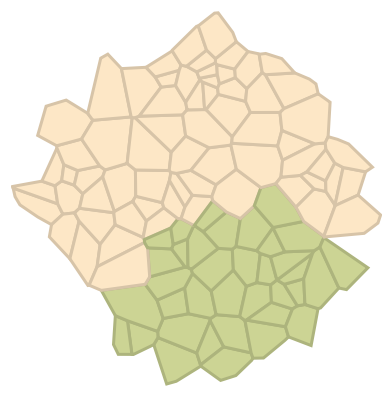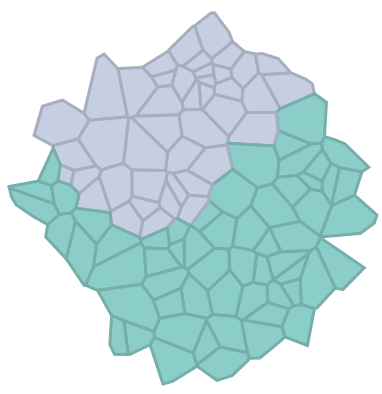

# CRC64

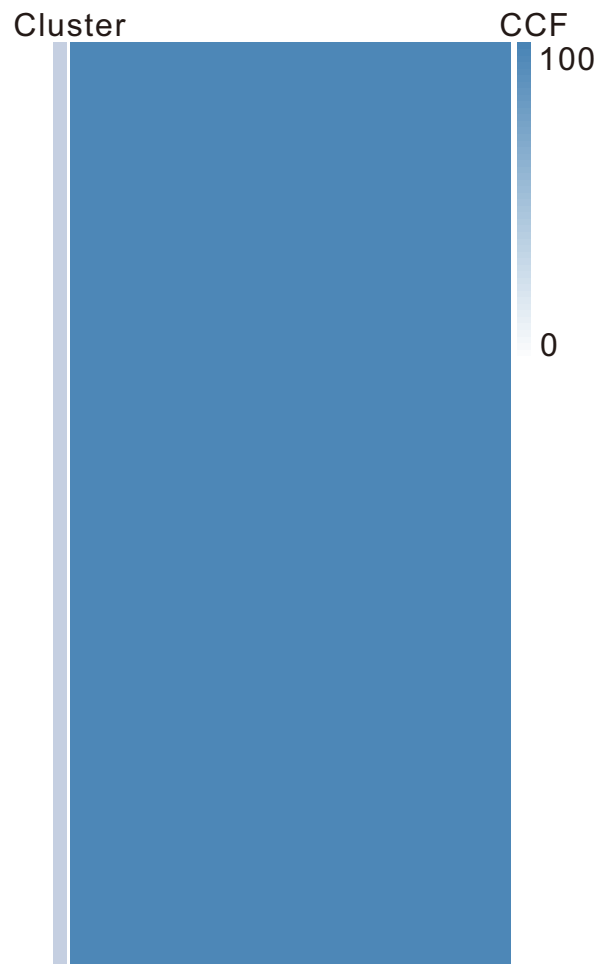

TR1

TR3

TR1

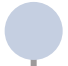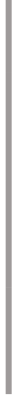

TR3

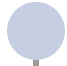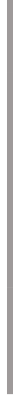

| Gene           | Cytoband | Type  | Cluster |
|----------------|----------|-------|---------|
| <i>PIK3CA</i>  | 3q26.32  | SNV   | NA      |
| <i>FBXW7</i>   | 4q31.3   | SNV   | NA      |
| <i>KRAS</i>    | 12p12.1  | SNV   | NA      |
| <i>SMAD2</i>   | 18q21.1  | SNV   | NA      |
| <i>APC</i>     | 5q22.2   | InDel | NA      |
| <i>CBFA2T3</i> | 16q24.3  | Del   | NA      |

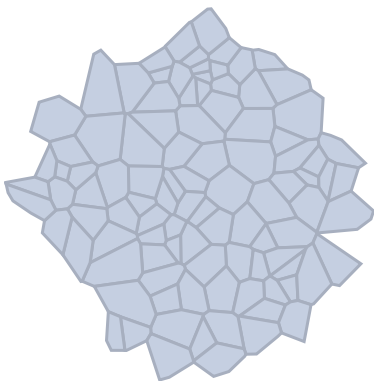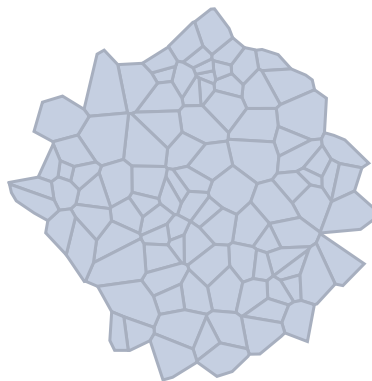

# CRC65

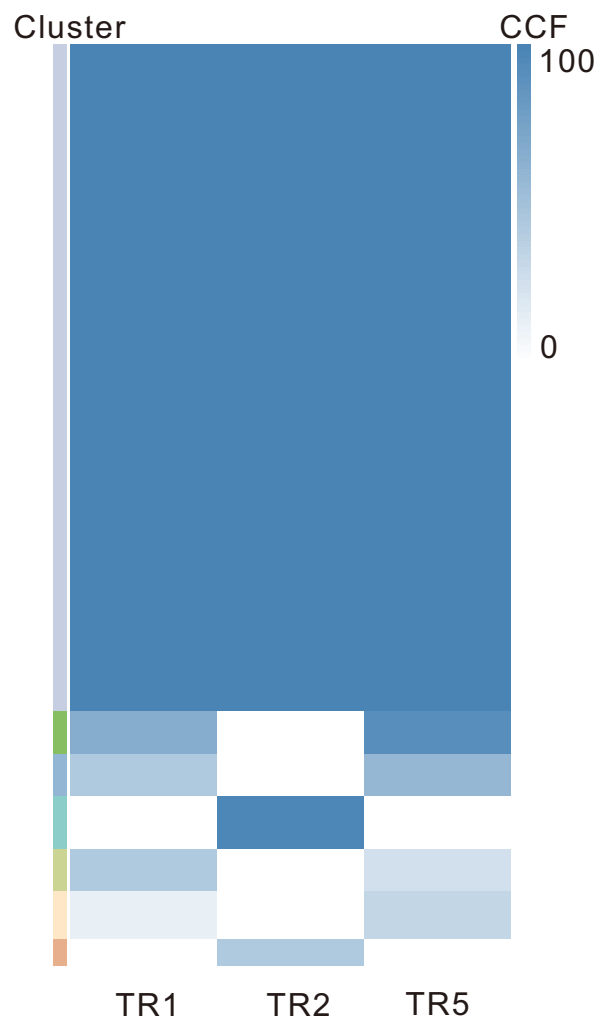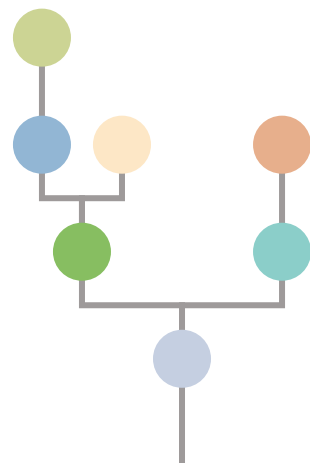

| Gene     | Cytoband | Type  | Cluster |
|----------|----------|-------|---------|
| FAT4     | 4q28.1   | SNV   | 1       |
| CSMD3    | 8q23.3   | SNV   | 1       |
| KRAS     | 12p12.1  | SNV   | 1       |
| TP53     | 17p13.1  | SNV   | 1       |
| APC      | 5q22.2   | InDel | 1       |
| SRC      | 20q11.23 | Amp   | 1       |
| MAFB     | 20q12    | Amp   | 1       |
| PLCG1    | 20q12    | Amp   | 1       |
| NFATC2   | 20q13.2  | Amp   | 1       |
| SALL4    | 20q13.2  | Amp   | 1       |
| PTK6     | 20q13.33 | Amp   | 1       |
| SIRPA    | 20p13    | Del   | 1       |
| CLTCL1   | 22q11.21 | Del   | 1       |
| LZTR1    | 22q11.21 | Del   | 1       |
| SMARCB1  | 22q11.23 | Del   | 1       |
| CHEK2    | 22q12.1  | Del   | 1       |
| ZNRF3    | 22q12.1  | Del   | 1       |
| NF2      | 22q12.2  | Del   | 1       |
| MYH9     | 22q12.3  | Del   | 1       |
| APOBEC3B | 22q13.1  | Del   | 1       |
| EP300    | 22q13.2  | Del   | 1       |
| MKL1     | 22q13.2  | Del   | 1       |
| TBX3     | 12q24.21 | InDel | NA      |
| LZTR1    | 22q11.21 | InDel | NA      |
| GNAS     | 20q13.32 | Amp   | NA      |

## TR1

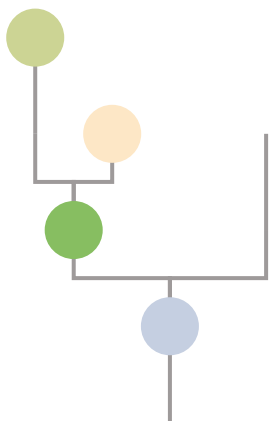

## TR2

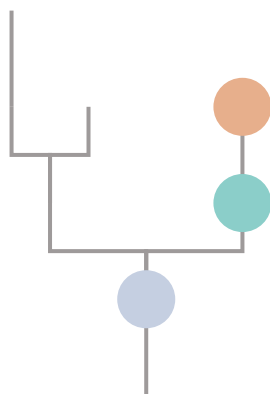

## TR5

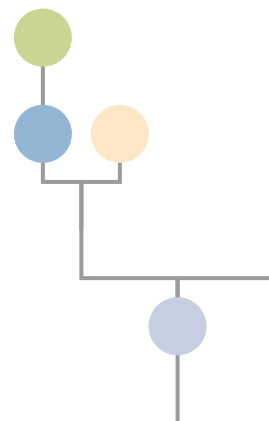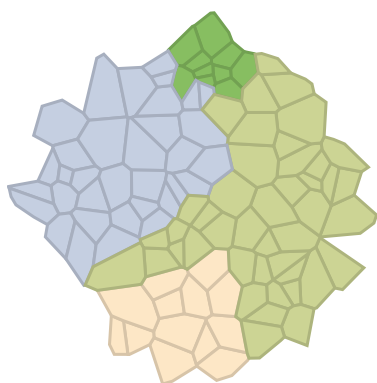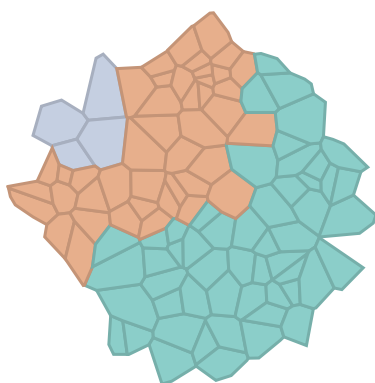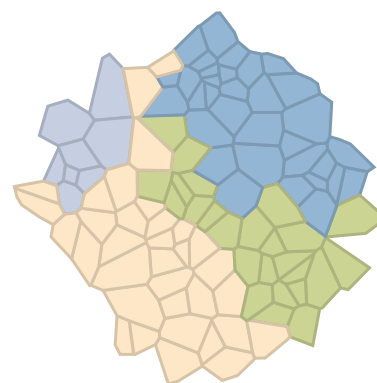

# CRC66

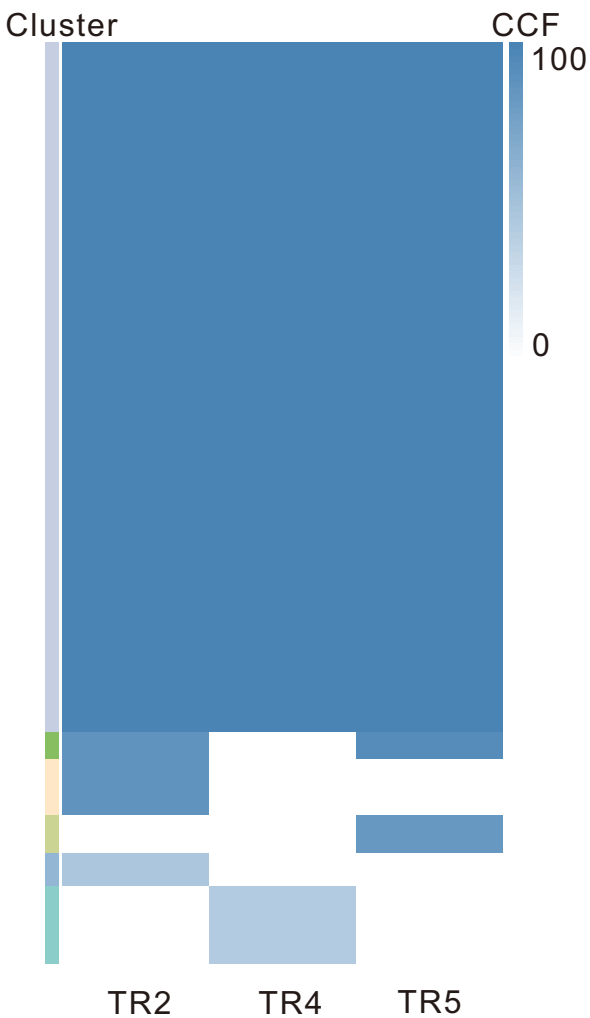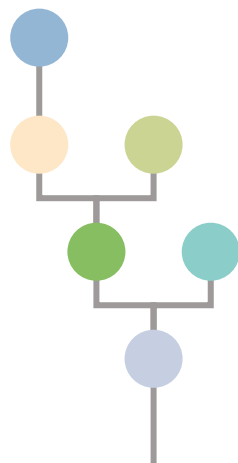

| Gene   | Cytoband | Type | Cluster |
|--------|----------|------|---------|
| *FBXW7 | 4q31.3   | SNV  | 1       |
| *FBXW7 | 4q31.3   | SNV  | 1       |
| *FBXW7 | 4q31.3   | SNV  | 1       |
| APC    | 5q22.2   | SNV  | 1       |
| CDH11  | 16q21    | SNV  | 1       |
| TP53   | 17p13.1  | SNV  | 1       |
| SRC    | 20q11.23 | Amp  | 1       |
| MAFB   | 20q12    | Amp  | 1       |
| PLCG1  | 20q12    | Amp  | 1       |
| NFATC2 | 20q13.2  | Amp  | 1       |
| SALL4  | 20q13.2  | Amp  | 1       |
| GNAS   | 20q13.32 | Amp  | 1       |
| PTK6   | 20q13.33 | Amp  | 1       |

## TR2

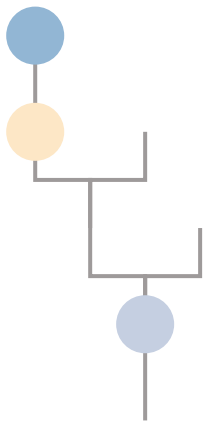

## TR4

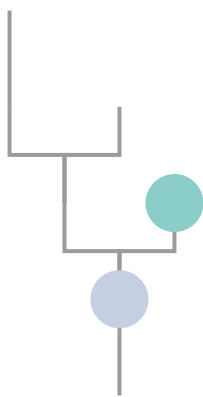

## TR5

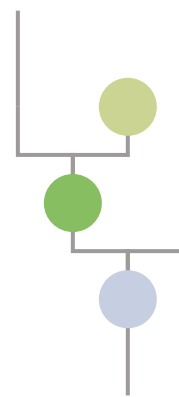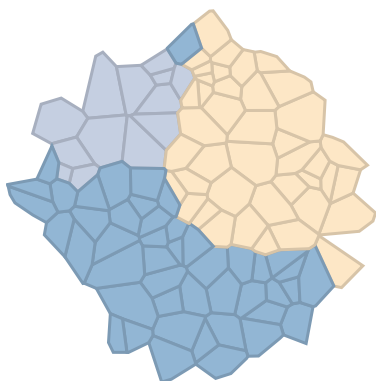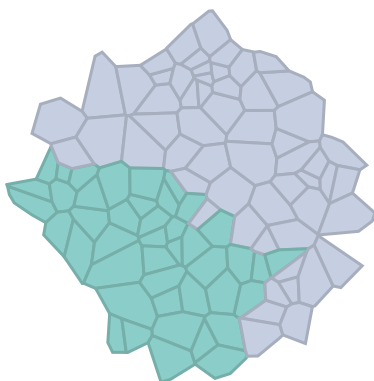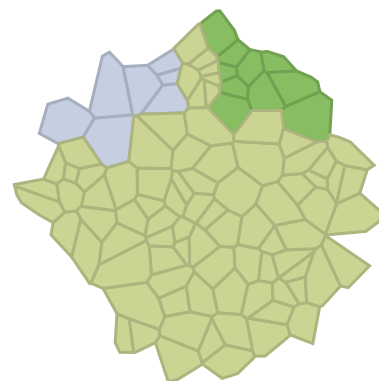

# CRC67

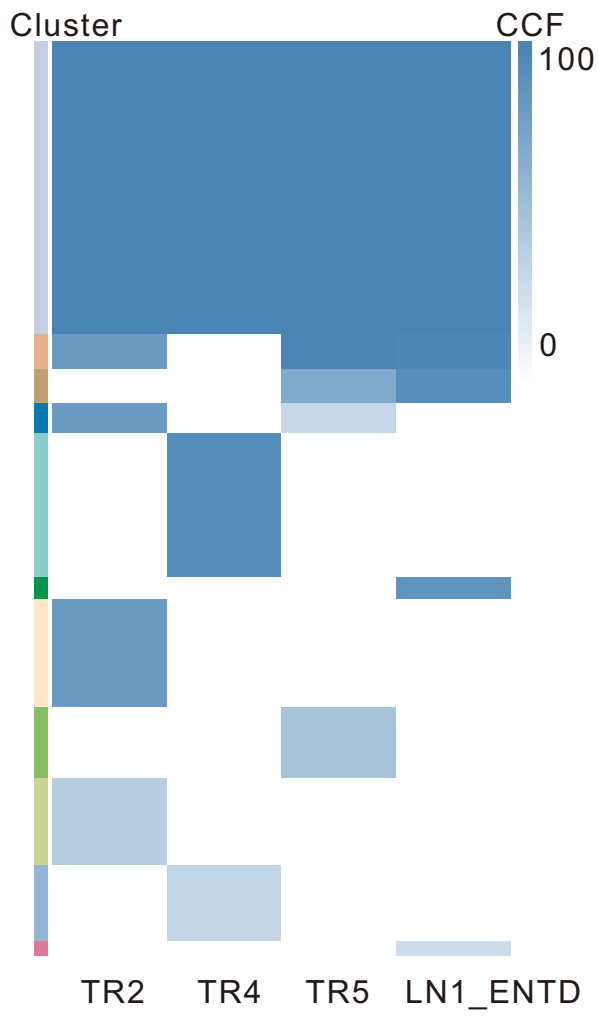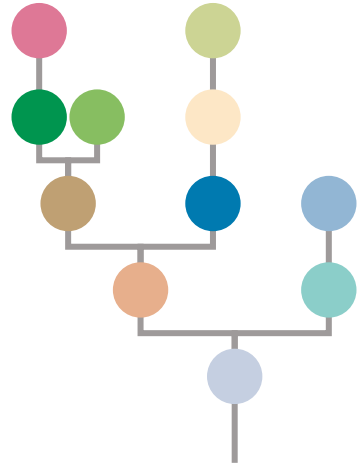

| Gene     | Cytoband | Type | Cluster |
|----------|----------|------|---------|
| *LRP1B   | 2q22.1   | SNV  | 1       |
| PIK3CA   | 3q26.32  | SNV  | 1       |
| APC      | 5q22.2   | SNV  | 1       |
| EZH2     | 7q36.1   | SNV  | 1       |
| TP53     | 17p13.1  | SNV  | 1       |
| SMAD4    | 18q21.2  | SNV  | 1       |
| ARHGAP26 | 5q31.3   | SNV  | 3       |
| *LRP1B   | 2q22.1   | SNV  | 6       |
| *LRP1B   | 2q22.1   | SNV  | 9       |

## TR2

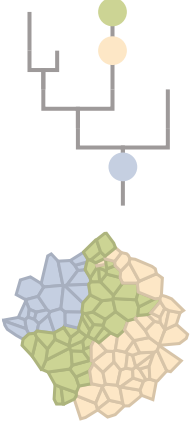

## TR3

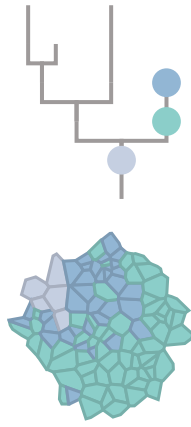

## TR5

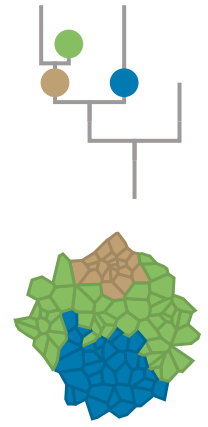

## LN1\_ENTD

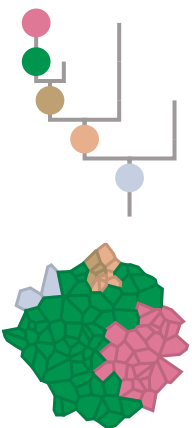

# CRC68

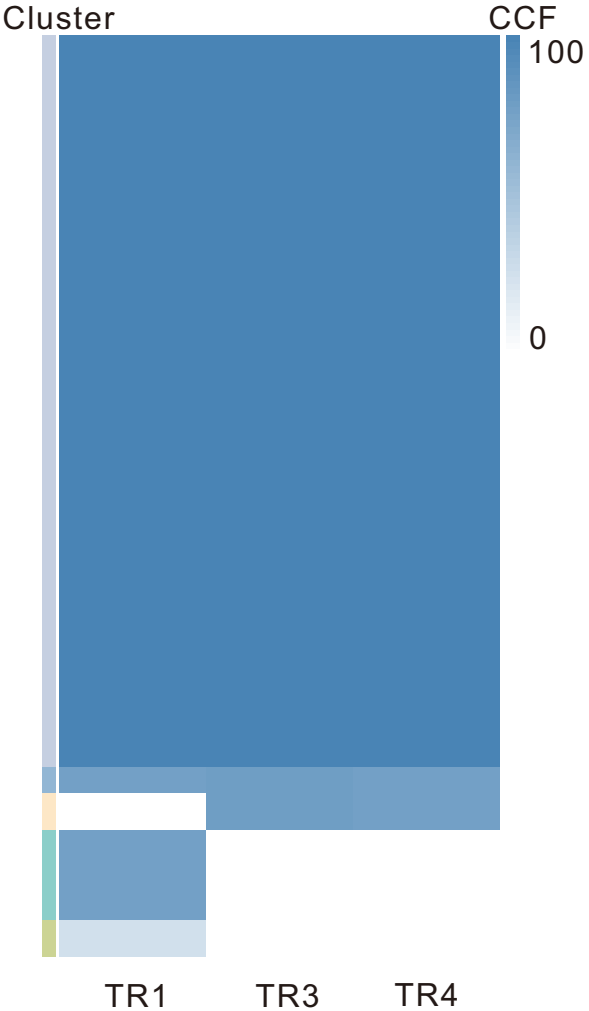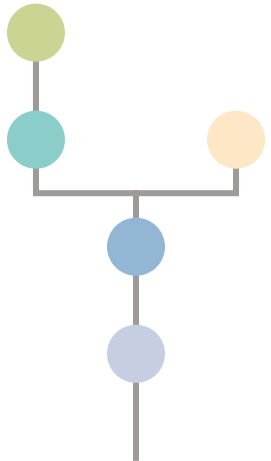

| Gene           | Cytoband | Type  | Cluster |
|----------------|----------|-------|---------|
| <i>NRAS</i>    | 1p13.2   | SNV   | 1       |
| <i>PIK3CA</i>  | 3q26.32  | SNV   | 1       |
| * <i>APC</i>   | 5q22.2   | SNV   | 1       |
| <i>KRAS</i>    | 12p12.1  | SNV   | 1       |
| <i>CDH11</i>   | 16q21    | SNV   | 1       |
| <i>TP53</i>    | 17p13.1  | SNV   | 1       |
| * <i>APC</i>   | 5q22.2   | InDel | 1       |
| <i>SRC</i>     | 20q11.23 | Amp   | 1       |
| <i>MAFB</i>    | 20q12    | Amp   | 1       |
| <i>PLCG1</i>   | 20q12    | Amp   | 1       |
| <i>NFATC2</i>  | 20q13.2  | Amp   | 1       |
| <i>SALL4</i>   | 20q13.2  | Amp   | 1       |
| <i>GNAS</i>    | 20q13.32 | Amp   | 1       |
| <i>PTK6</i>    | 20q13.33 | Amp   | 1       |
| <i>PRKAR1A</i> | 17q24.2  | SNV   | NA      |

## TR1

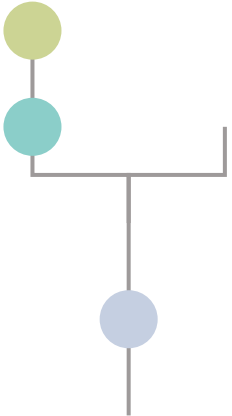

## TR3

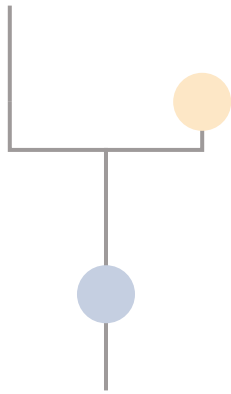

## TR4

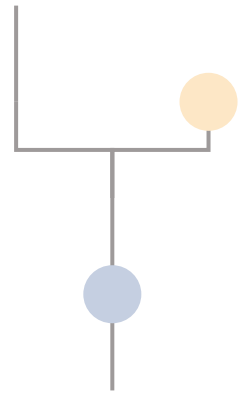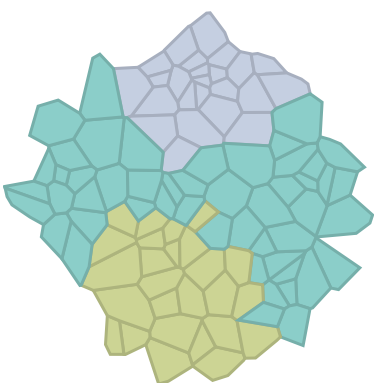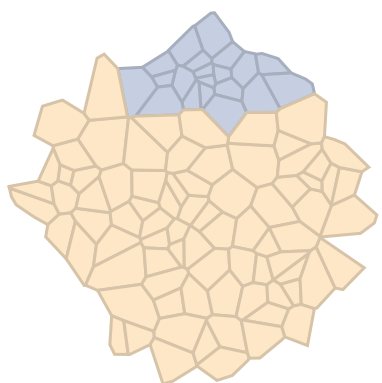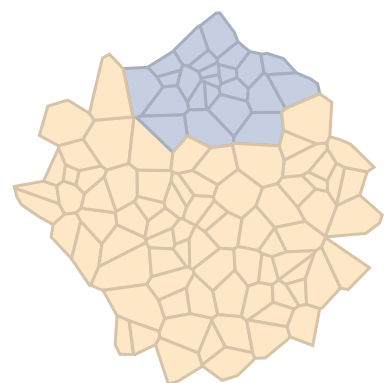

Supplement: mmc9.pdf [file mmc9.pdf]
