# Supplementary material for: Comparative analysis of clonal evolution among patients with right- and left-sided colon and rectal cancer
Source: PubMed Central journal article supplement — iScience. 2021 Jun 11;24(7):102718. doi: 10.1016/j.isci.2021.102718 (PMC8254024; doi:10.1016/j.isci.2021.102718), 2021-06-11

## Supplemental Data 2

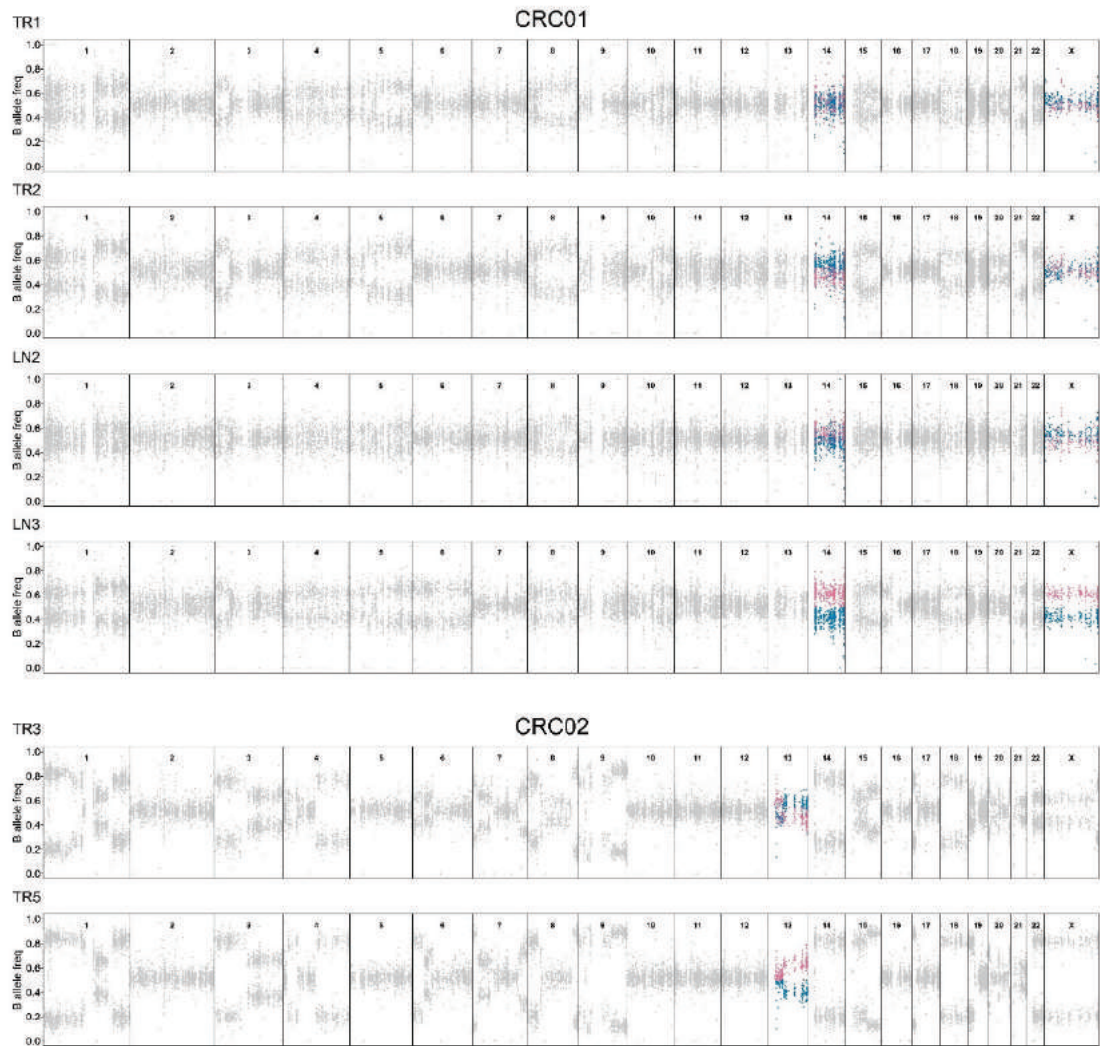

### Supplemental Data 2. Mirrored subclonal allelic imbalance (MSAI) events in CRC tumors, Related to Figure 6.

B-allele frequency (BAF) profile of heterozygous SNPs across the genome (chromosomes 1-22, X) from all regions of different tumors. Sections of BAF in regions that have MSAI were highlighted in blue or red.

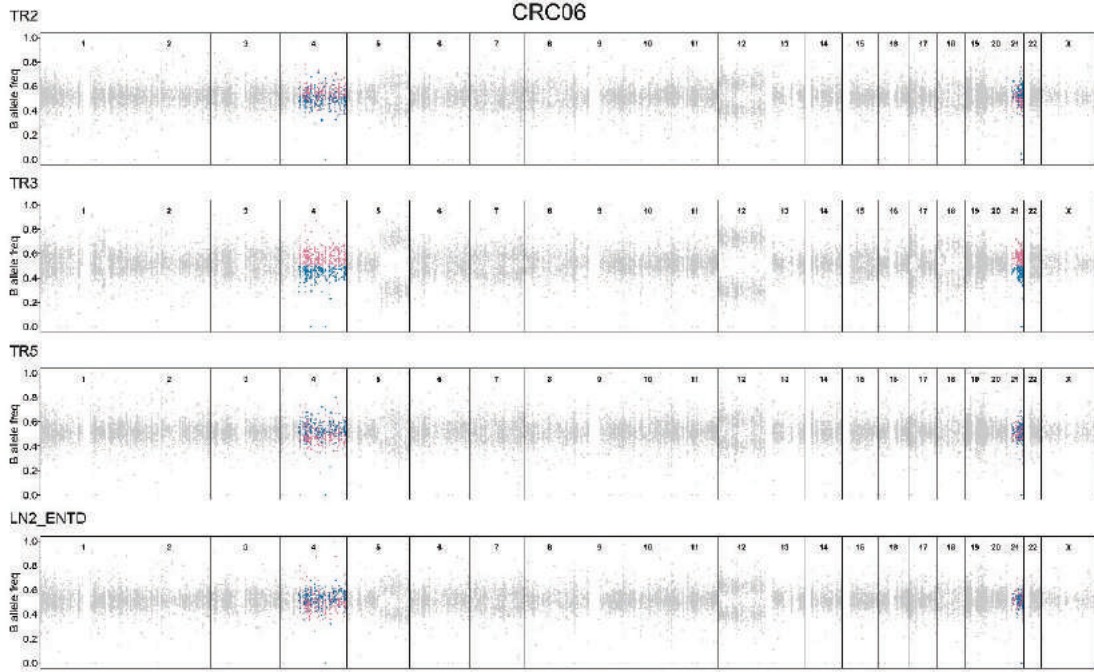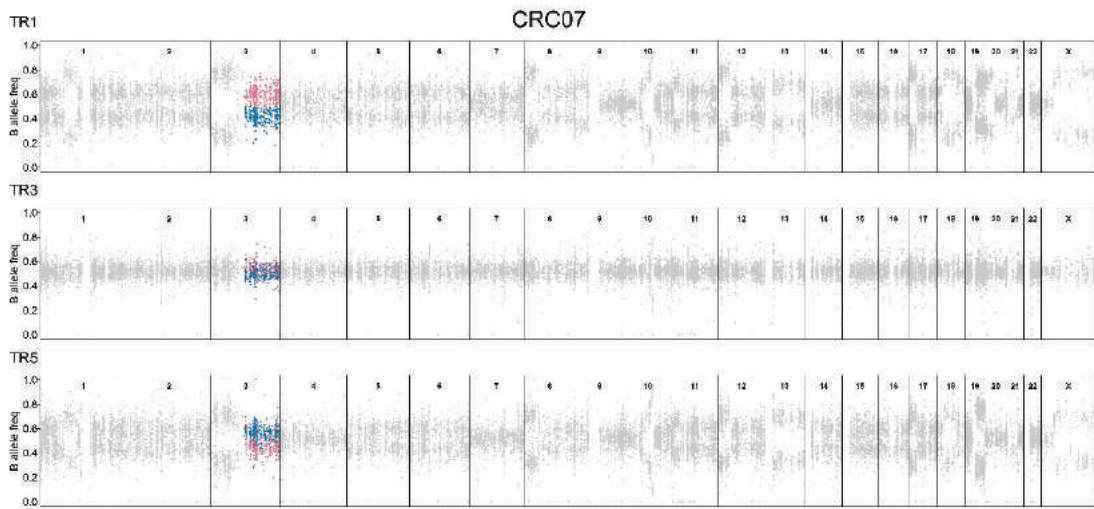

### CRC12

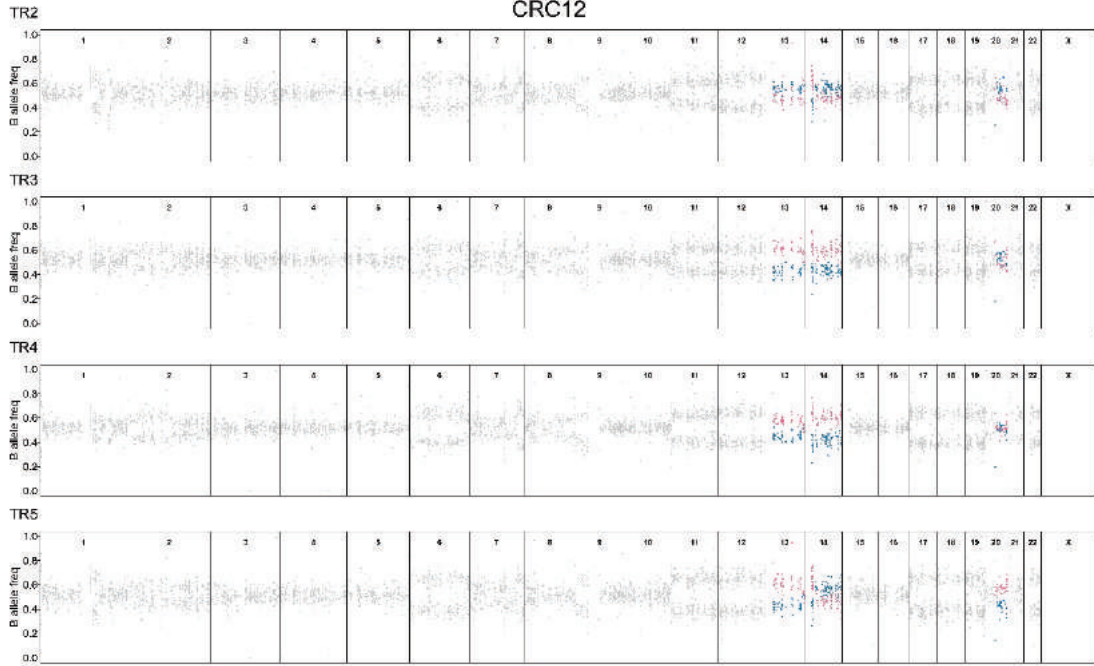

### CRC20

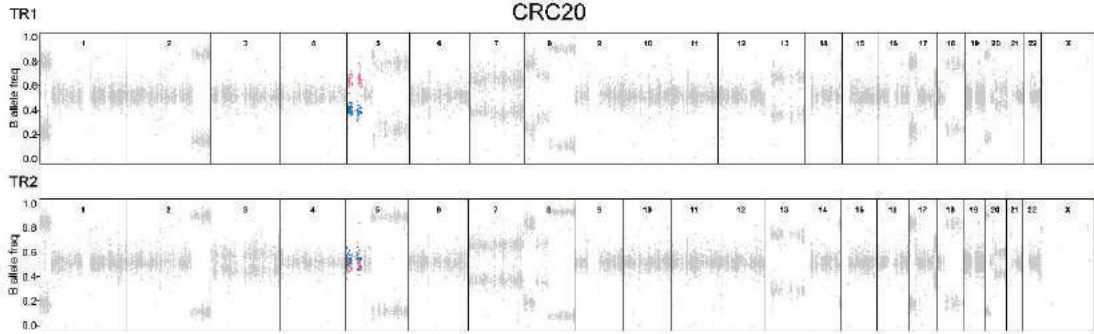

### CRC22

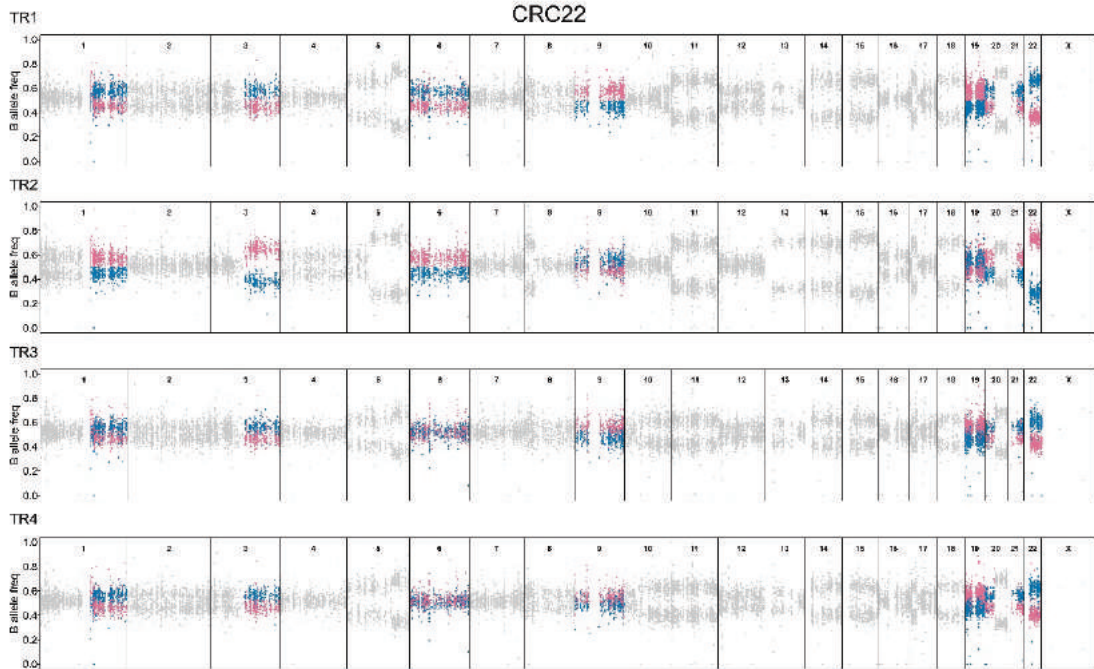

CRC28

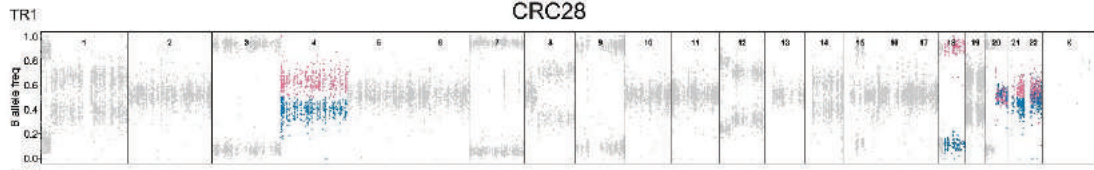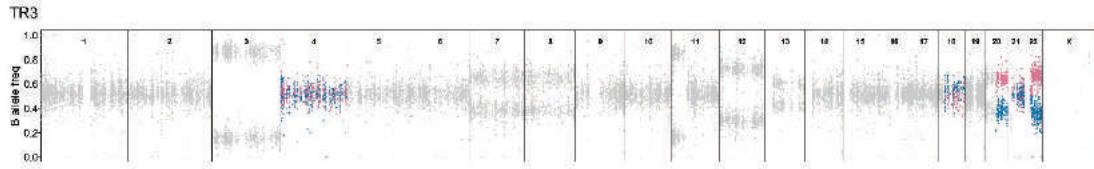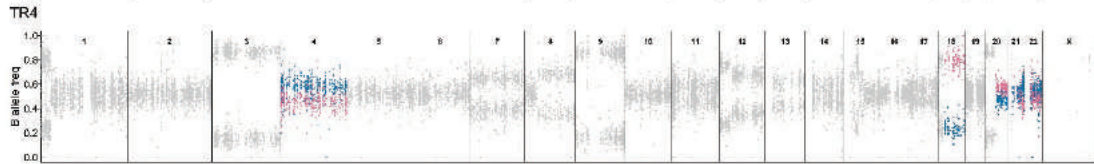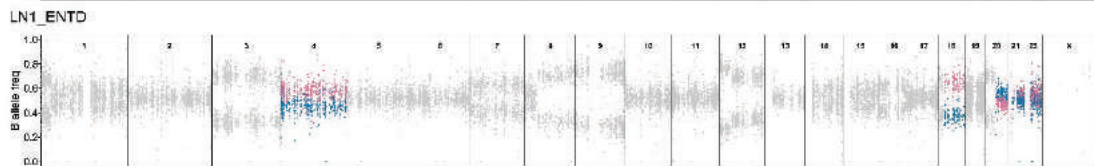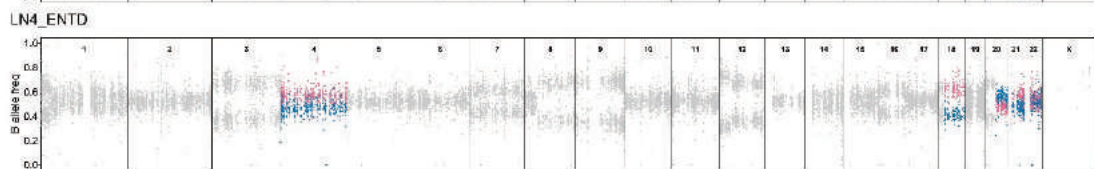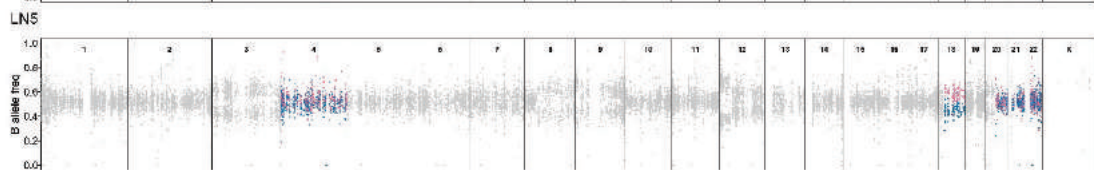

CRC32

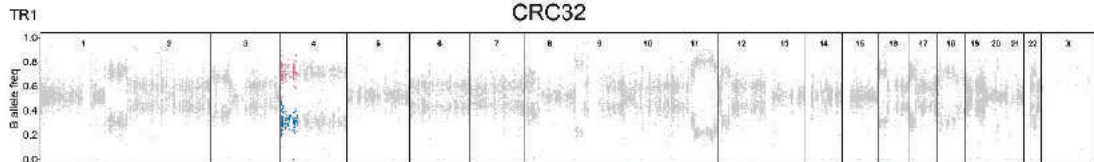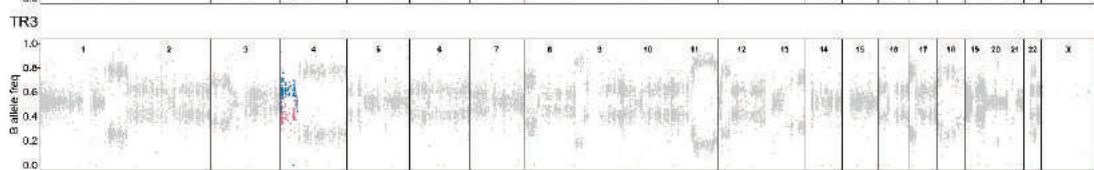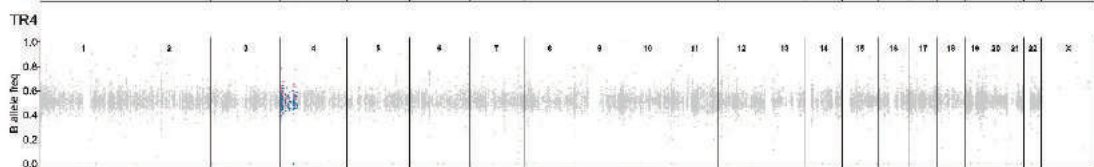

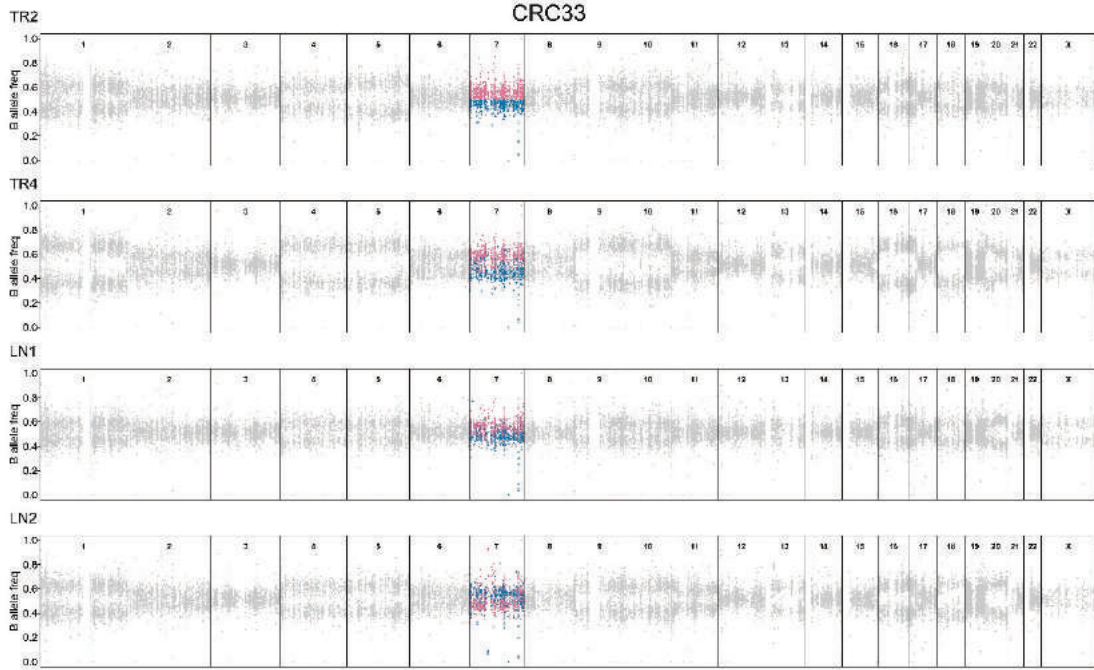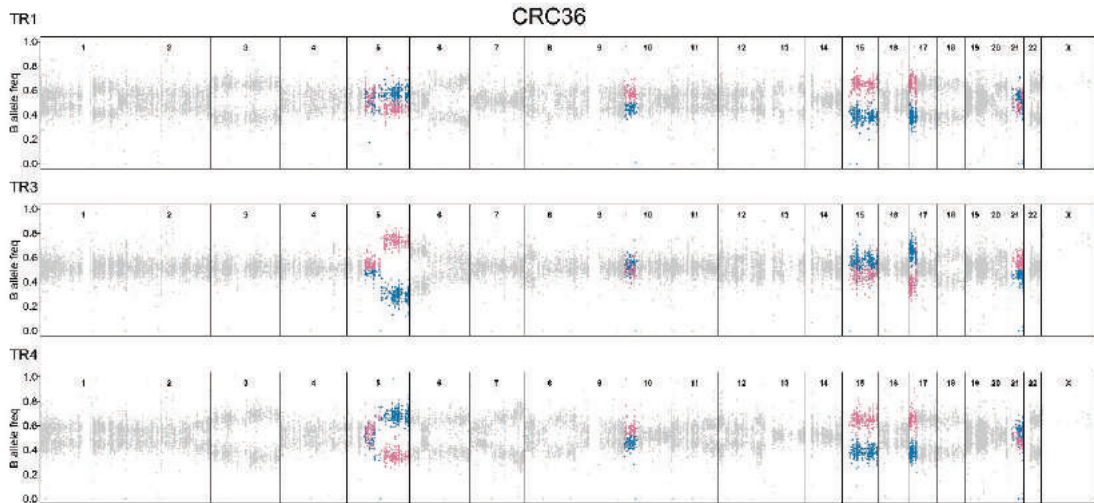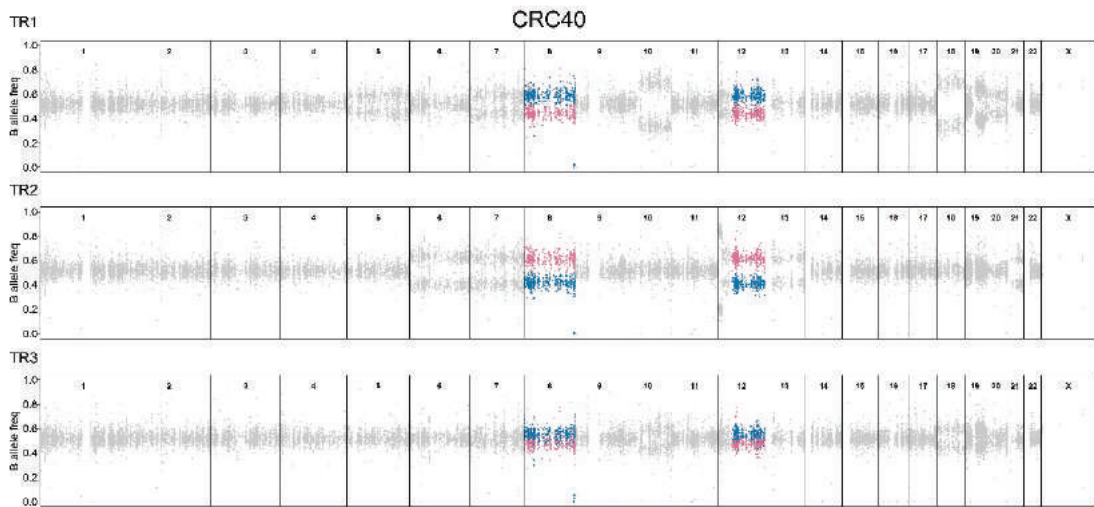

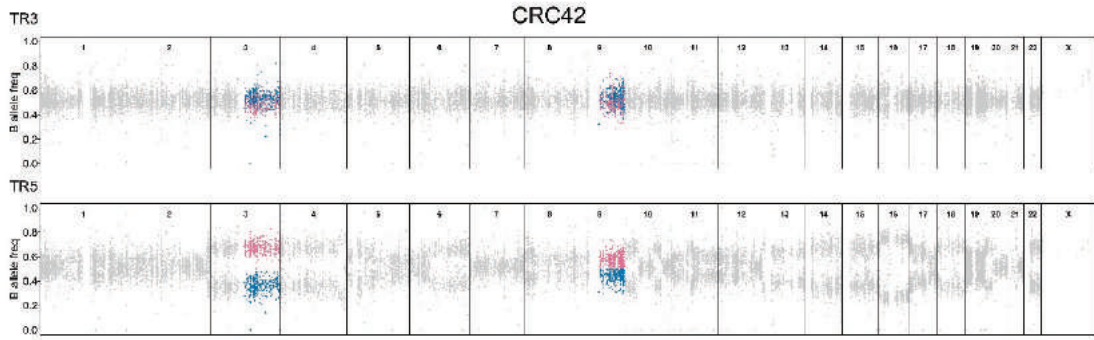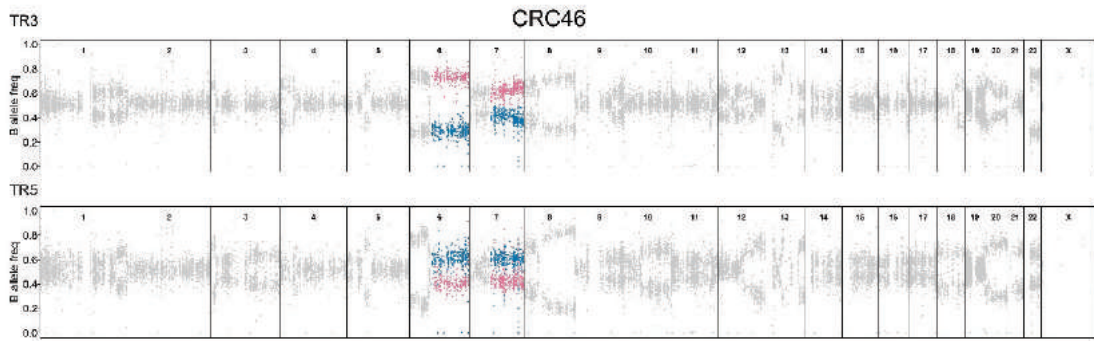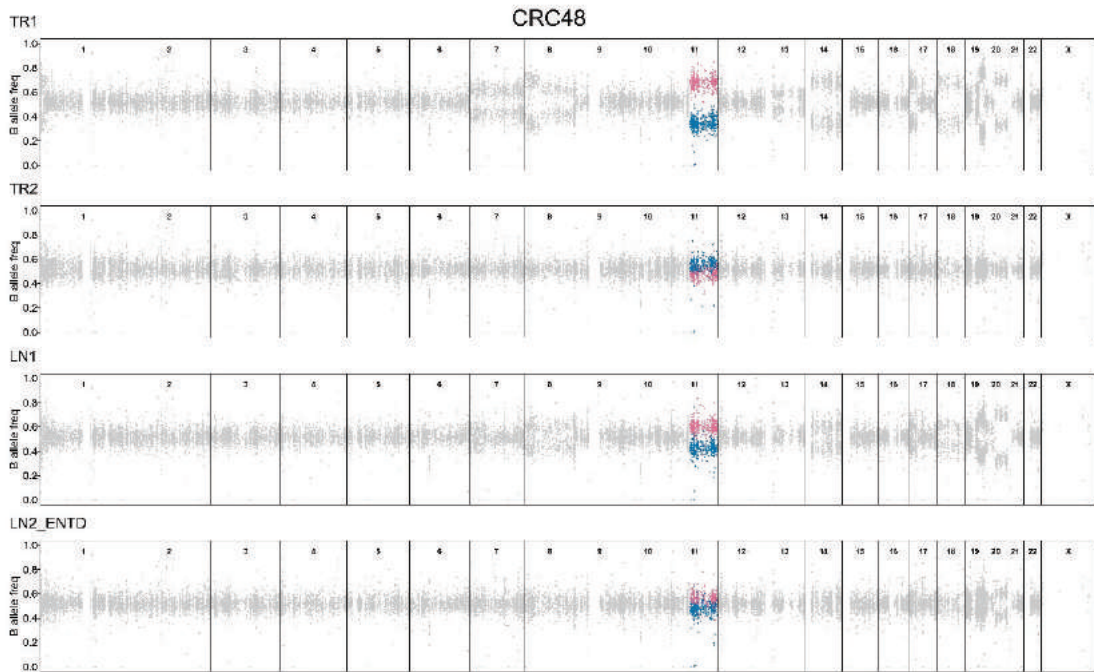

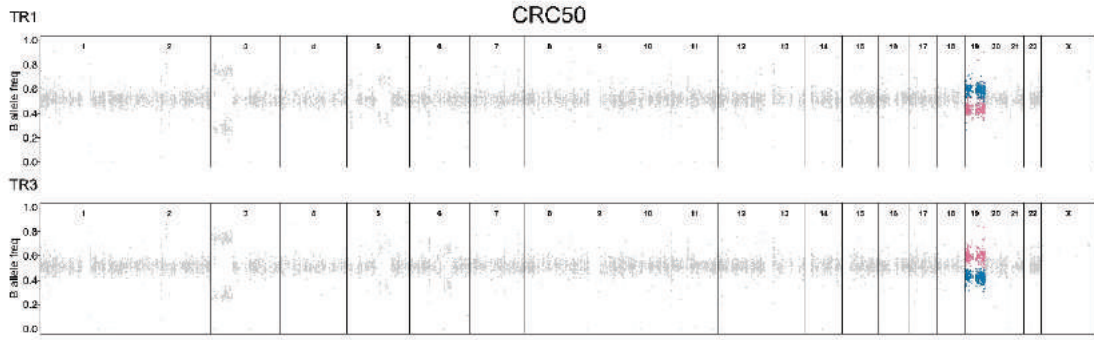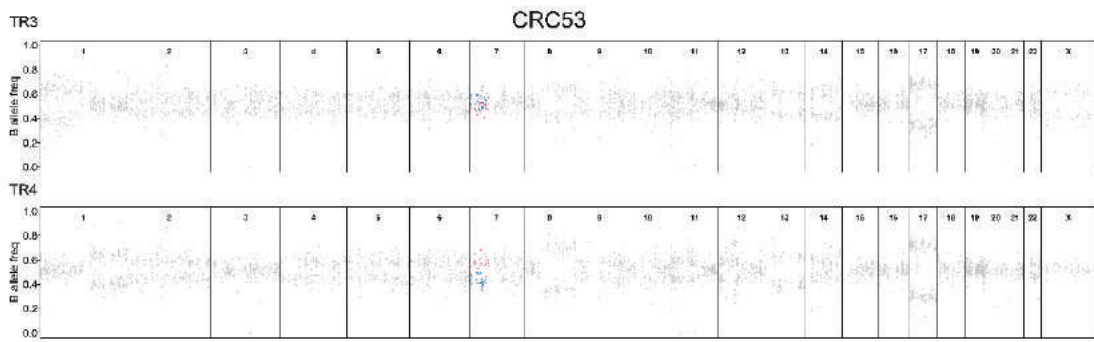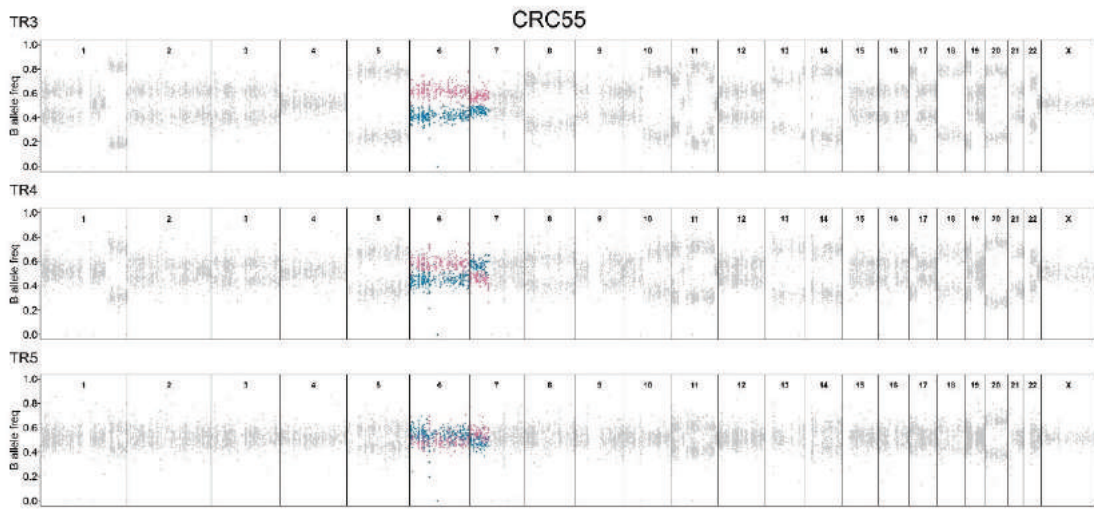

### CRC59

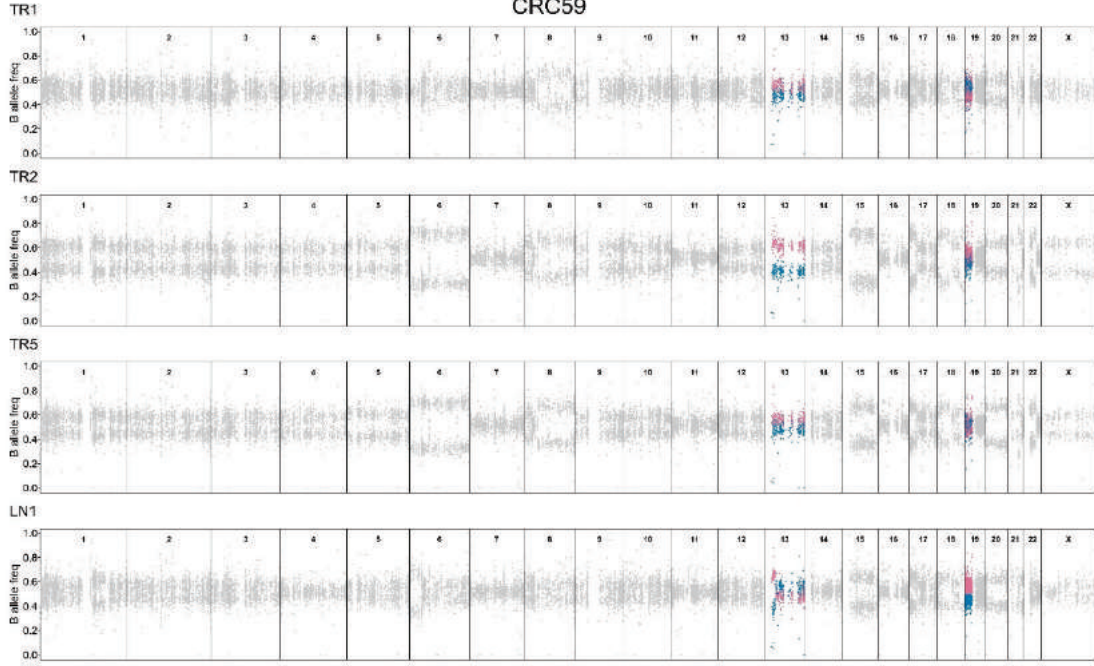

### CRC61

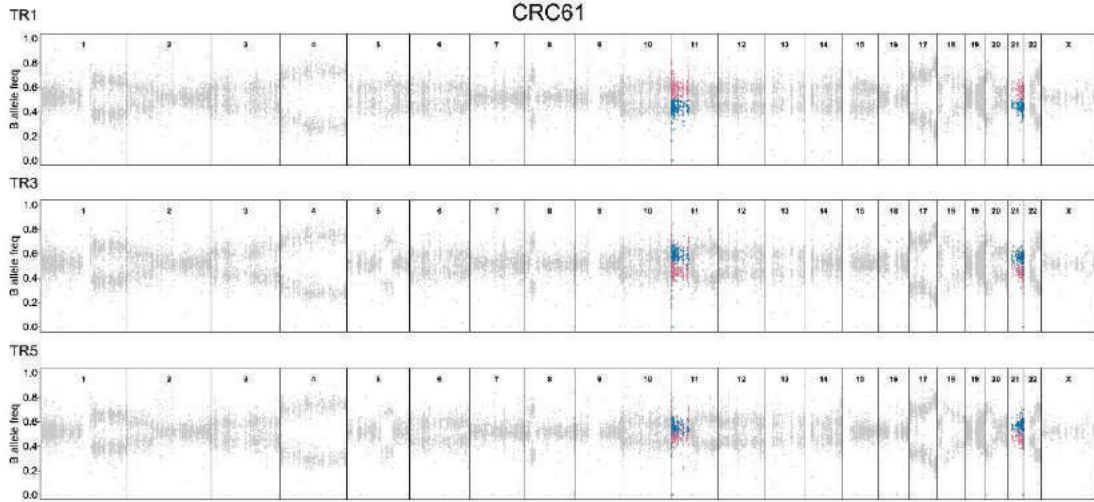

### CRC66

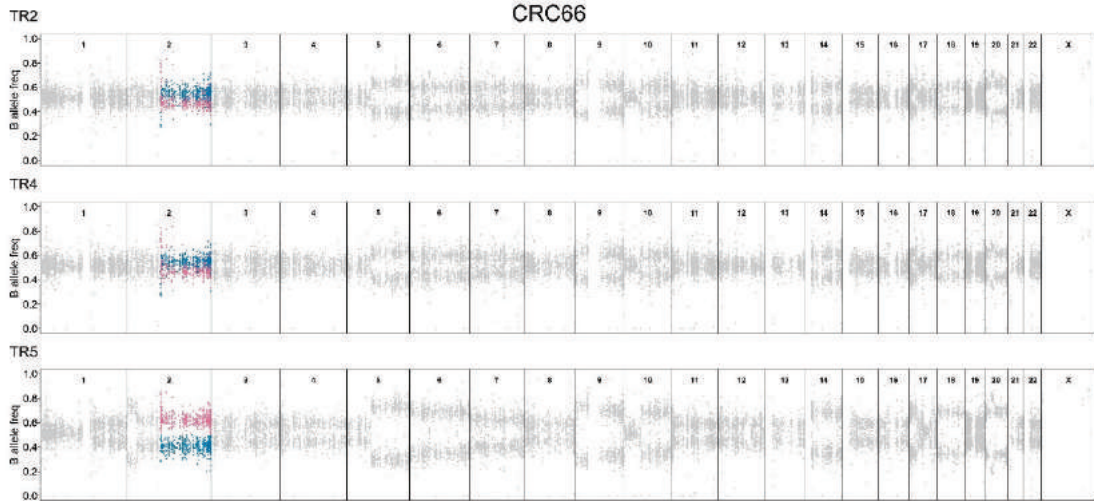



CRC67

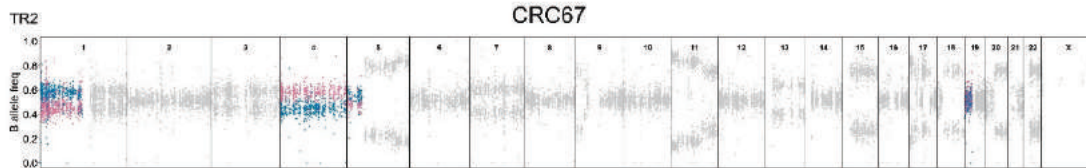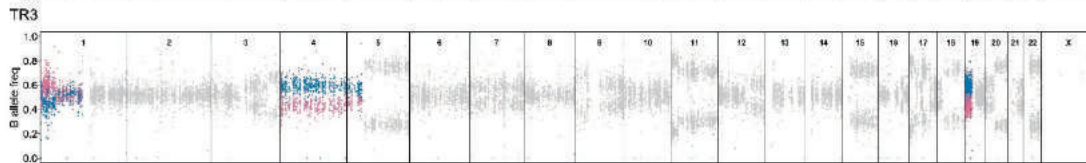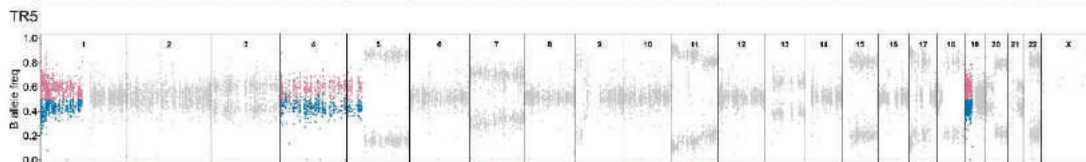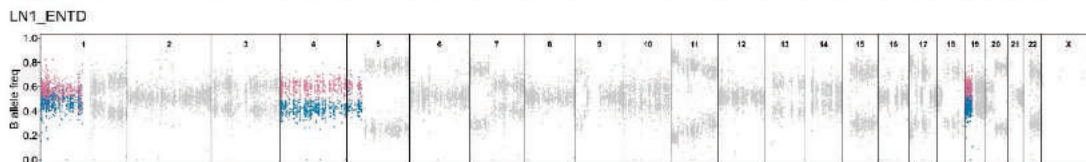

CRC68

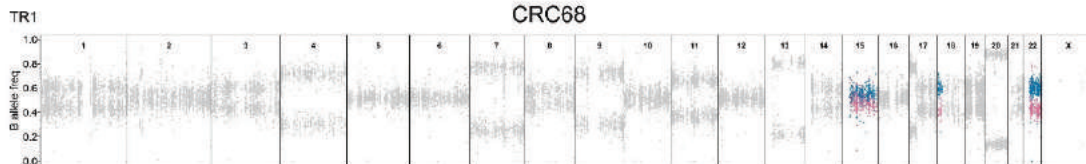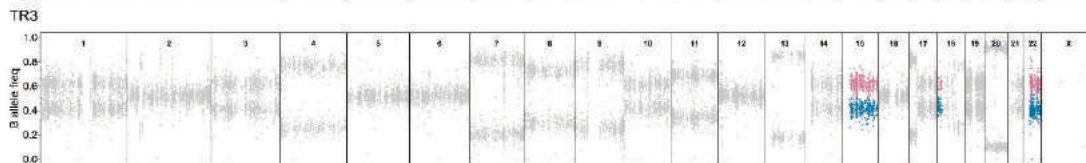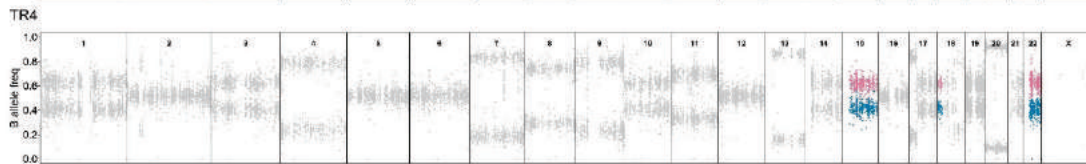

Supplement: mmc10.pdf [file mmc10.pdf]
